# Supplementary material for: Inflammatory and infectious upper respiratory diseases associate with 59 genomic loci that link to type 2 inflammation genes
Source: Research Square preprint supplement (doi:10.21203/rs.3.rs-654053/v1), 2021-07-12
Supplement: Supplementary file 4 [file 1289865d7695d725a6824164.xlsx]

## Sheet: TableS1-Sinonasal_diseases_loci
Sinonasal diseases lead SNPs					J30,J32,J33,J34.2: Sinonasal diseases (n = 25,235)
		Nearest gene						CISD		J34.2: NSD
BAND	Alleles		rsid	EAF	OR (95 % CI)		p	OR (95 % CI)		OR (95 % CI)
2q12.1	T/A	IL18R1,IL1RL1	rs10208293	0.264	0.91	(0.89–0.94)	3.58e-15	0.91	(0.88–0.93)	0.95	(0.91–0.99)
*2q22.3	A/G	ZEB2	rs16825450	0.103	0.9	(0.87–0.94)	1.69e-09	0.9	(0.87–0.94)	0.88	(0.83–0.94)
*5q21.3	G/A	MAN2A1	rs7737074	0.628	0.94	(0.92–0.97)	3.7e-08	0.94	(0.92–0.97)	0.94	(0.91–0.98)
*5q21.3	A/T	TMEM232	rs187769944	0.023	1.21	(1.13–1.30)	1.47e-08	1.25	(1.15–1.35)	1.2	(1.06–1.35)
5q22.1	C/G	WDR36	rs6884870	0.304	1.1	(1.07–1.13)	4.45e-18	1.13	(1.10–1.16)	1.05	(1.01–1.09)
6p21.32	-	HLA	-	0.194	1.11	(1.08–1.14)	9.5e-16	1.14	(1.10–1.18)	0.92	(0.88–0.96)
9p24.1	T/C	IL33	rs2095044	0.76	0.88	(0.85–0.91)	7.22e-27	0.86	(0.83–0.89)	0.92	(0.88–0.97)
9q33.3	A/G	NEK6	rs1107342	0.407	1.06	(1.03–1.09)	3.2e-08	1.06	(1.04–1.09)	1.03	(0.99–1.07)
*10p14	G/A	GATA3	rs1663680	0.302	0.93	(0.90–0.95)	3.34e-12	0.91	(0.88–0.94)	0.95	(0.91–0.99)
*11q13.5	A/G	EMSY	rs10160518	0.438	1.06	(1.04–1.09)	2.79e-09	1.07	(1.04–1.10)	1.04	(1.00–1.08)
*14q31.1	C/A	NRXN3	rs1022434	0.929	1.13	(1.08–1.18)	3.47e-09	1.12	(1.07–1.18)	1.14	(1.07–1.23)
15q22.33	C/T	SMAD3	rs17293632	0.262	1.07	(1.04–1.10)	2.66e-08	1.08	(1.05–1.11)	1.05	(1.01–1.10)
*16p13.13	C/T	CLEC16A	rs8064154	0.311	0.94	(0.92–0.97)	4e-08	0.94	(0.92–0.97)	0.95	(0.92–1.00)
Supplementary Table 1: Lead SNPs of genome-wide associated loci in GWAS of sinonasal diseases (n = 25,235). Phenotypes included in this group (allergic sinonasal diseases and DNS) have effect sizes annotated with 95 % CI. ‘Alleles’ denotes the reference / effect alleles. EAF: Effect allele frequency. The HLA locus is annotated for the lead SNP according to each phenotype, not the corresponding SN…

## Sheet: TableS2-CISD_loci
CISD lead SNPs					J30,J32,J33: Chronic inflammatory sinonasal diseases (n = 19,901)
								J30: VAR		J32: CRS		J33: NP
Band	Allele	rsid	Nearest gene	EAF	OR (95 % CI)		p	OR (95 % CI)		OR (95 % CI)		OR (95 % CI)
2q12.1	A/G	rs11690644	IL18R1,IL1RL1	0.159	0.88	(0.85–0.91)	1.08e-16	0.88	(0.83–0.92)	0.9	(0.86–0.94)	0.88	(0.82–0.94)
2q22.3	T/C	rs1370525	ZEB2	0.089	0.9	(0.86–0.94)	4.64e-08	0.95	(0.89–1.01)	0.89	(0.84–0.94)	0.79	(0.72–0.86)
5p13.2	G/T	rs4594881	IL7R	0.396	0.94	(0.91–0.97)	7.87e-09	0.94	(0.90–0.97)	0.95	(0.91–0.98)	0.89	(0.84–0.94)
5q22.1	A/G	rs6884870	TSLP	0.304	1.13	(1.09–1.16)	1.02e-22	1.1	(1.06–1.15)	1.13	(1.09–1.18)	1.26	(1.19–1.34)
6p21.32	-	-	HLA	0.194	1.14	(1.10–1.18)	1.94e-19	1.1	(1.06–1.14)	1.17	(1.13–1.21)	1.45	(1.36–1.54)
9p24.1	T/C	rs2095044	IL33	0.76	0.86	(0.83–0.89)	2.27e-30	0.9	(0.86–0.94)	0.87	(0.83–0.90)	0.7	(0.65–0.74)
9q33.3	C/T	rs3758213	NEK6	0.382	0.94	(0.91–0.96)	2.32e-08	0.91	(0.88–0.95)	0.94	(0.90–0.97)	0.96	(0.91–1.01)
10p14	T/C	rs1663680	GATA3	0.302	0.91	(0.88–0.94)	7.34e-15	0.92	(0.89–0.96)	0.92	(0.88–0.95)	0.82	(0.78–0.87)
11q13.5	G/A	rs7936323	EMSY	0.415	1.06	(1.03–1.09)	3.76e-09	1.12	(1.07–1.16)	1.01	(0.97–1.05)	1.05	(0.99–1.11)
*13q14.11	T/C	rs2701859	FOXO1	0.287	1.08	(1.04–1.11)	6.62e-09	1.07	(1.03–1.12)	1.07	(1.03–1.11)	1.09	(1.03–1.15)
15q22.33	C/T	rs56062135	SMAD3	0.262	1.08	(1.05–1.11)	6.81e-10	1.1	(1.06–1.15)	1.06	(1.02–1.10)	1.12	(1.05–1.18)
16p13.13	C/T	rs11644510	CLEC16A	0.336	0.93	(0.90–0.96)	1.13e-08	0.95	(0.91–0.99)	0.92	(0.88–0.96)	0.84	(0.79–0.90)
*16p12.1	G/A	rs74630264	IL4R	0.081	0.89	(0.85–0.93)	2.02e-08	0.88	(0.82–0.93)	0.91	(0.86–0.97)	0.86	(0.78–0.94)
*17q21.1	A/G	rs3816470	IKZF3	0.568	0.94	(0.91–0.96)	1.57e-08	0.94	(0.91–0.98)	0.93	(0.90–0.97)	0.9	(0.85–0.95)
*17q21.32	C/T	rs28397663	PHOSPHO1	0.426	1.06	(1.04–1.09)	4.74e-08	1.06	(1.02–1.10)	1.06	(1.02–1.09)	1.09	(1.03–1.14)
Supplementary Table 2: Lead SNPs of genome-wide associated loci in GWAS of sinus diseases (n = 19,901). Phenotypes included in this group (VAR, CRS and NP) have effect sizes annotated with 95 % CI. ‘Alleles’ denotes the reference / effect alleles. EAF: Effect allele frequency. The HLA locus is annotated for the lead SNP according to each phenotype, not the corresponding SNP of the parent GWAS (CI…

## Sheet: TableS3-Pharyngeal_dis_loci
Pharyngeal diseases lead SNPs					J35,J36: Pharyngeal diseases (n = 33,157)
								J35: CDTA		J36: PA
Locus	Allele	rsid	Nearest gene	EAF	OR (95 % CI)		p	OR (95 % CI)		OR (95 % CI)
*1p36.23	G/T	rs12082271	SLC45A1	0.302	0.94	(0.91–0.96)	1.92e-10	0.94	(0.92–0.97)	0.9	(0.86–0.95)
*1p31.3	G/A	rs192569879	IL23R	0.005	0.69	(0.59–0.79)	4.66e-08	0.71	(0.61–0.82)	0.65	(0.48–0.87)
*1q41	A/G	rs12128267	DUSP10	0.122	1.1	(1.06–1.13)	1.75e-10	1.11	(1.07–1.14)	1.07	(1.00–1.15)
2q13	A/G	rs1045267	MIR4435-2HG	0.222	0.91	(0.88–0.93)	1.42e-20	0.91	(0.89–0.94)	0.88	(0.84–0.93)
2q33.3	A/G	rs189411872	ADAM23	0.66	1.4	(1.28–1.53)	3.07e-15	1.53	(1.39–1.67)	0.8	(0.66–0.97)
3q21.2	C/T	rs1980080	SLC12A8	0.013	0.93	(0.91–0.96)	2.97e-12	0.94	(0.92–0.97)	0.88	(0.84–0.93)
4q24a	A/G	rs4648051	NFKB1	0.653	0.94	(0.92–0.96)	4.1e-11	0.94	(0.91–0.96)	0.95	(0.90–1.00)
4q24b	G/GC	rs5860793	TET2	0.399	1.08	(1.05–1.11)	3.6e-13	1.08	(1.05–1.11)	1.08	(1.03–1.14)
*4q25	T/C	rs6824923	AP1AR	0.716	0.93	(0.90–0.96)	1.97e-08	0.93	(0.90–0.96)	0.93	(0.88–0.99)
6p21.32		-	HLA		1.16	(1.10–1.21)	1.76e-11	1.18	(1.12–1.24)	0.88	(0.82–0.94)
*7p12.2	C/A	rs55935382	IKZF1	0.314	0.94	(0.92–0.97)	7.75e-09	0.94	(0.92–0.97)	0.94	(0.89–0.98)
*8p11.21	G/C	rs73631760	SLC20A2	0.118	1.09	(1.05–1.12)	2.91e-08	1.11	(1.07–1.15)	1.02	(0.94–1.10)
*9q34.2	G/A	rs950529388	ABO	0.564	0.94	(0.92–0.96)	2.56e-10	0.94	(0.91–0.96)	0.96	(0.91–1.00)
12p13.31a	A/G	rs10849448	LTBR	0.755	0.9	(0.87–0.92)	1.79e-22	0.9	(0.87–0.93)	0.86	(0.82–0.91)
13q21.33	T/C	rs9542155	KLHL1	0.643	0.94	(0.92–0.96)	2.02e-10	0.95	(0.93–0.98)	0.85	(0.81–0.89)
*16p11.2	T/G	rs6565189	ITGAL	0.709	0.94	(0.92–0.96)	1.97e-09	0.94	(0.92–0.97)	0.94	(0.89–0.99)
*16q22.1	G/A	rs117556162	CARMIL2	0.466	0.88	(0.84–0.93)	2.91e-08	0.88	(0.83–0.92)	0.91	(0.82–1.01)
17p11.2	C/G	rs573841223	TNFRSB13B	0.025	1.42	(1.33–1.52)	4.54e-29	1.43	(0.74–2.75)	1.45	(1.26 –1.68)
*17q11.2	C/T	rs2286521	FOXN1	0.085	1.1	(1.06–1.15)	5.7e-09	1.1	(1.06–1.14)	1.12	(1.04–1.22)
19p13.3	G/A	rs74178437	ZBTB7A	0.738	1.07	(1.04–1.10)	1.81e-09	1.07	(1.04–1.10)	1.06	(1.01–1.12)
*19q13.43	ACT/A	rs774674736	ZNF417	0.002	1.94	(1.54–2.43)	7.3e-09	2.01	(1.58–2.55)	1.39	(0.83–2.33)
*22q11.21	G/A	rs73150891	CCDC188	0.137	0.92	(0.89–0.95)	1.04e-08	0.92	(0.88–0.95)	0.96	(0.89–1.02)
*22q12.2	C/G	rs713875	HORMAD2	0.479	1.08	(1.06–1.11)	7.37e-18	1.1	(1.07–1.12)	1.04	(0.99–1.08)
*22q13.33	C/G	rs1019689682	PIM3	0.236	1.08	(1.05–1.11)	4.12e-11	1.08	(1.05–1.11)	1.08	(1.02–1.14)
*Xq26.3	G/A	rs2491199	VGLL1	0.488	0.96	(0.94–0.98)	2.08e-08	0.96	(0.94–0.98)	0.96	(0.92–1.00)
Lead SNPs of Genome-wide associated loci in GWAS of pharyngeal diseases (n = 33,157). Phenotypes included in this group (CDTA and PA) have effect sizes annotated with 95 % CI. ‘Alleles’ denotes the reference / effect alleles. EAF: Effect allele frequency. The HLA locus is annotated for each SNP according to the lowest p-value in the phenotype locus, not the corresponding SNP of the parent GWAS (p…

## Sheet: TableS4-Loci_overview
Overview of genome-wide significant loci lead SNPs									J30-J39: Inflammatory and infectious upper respiratory diseases (n = 61,197)
															J30,J32,J33,J34.2: Sinonasal diseases (n = 25,235)																		J35-J36: Pharyngeal diseases (n = 33,157)
															Sinonasal diseases			J30,J32,J33: Chronic inflammatory sinonasal diseases (n = 19,901)
							Most Severe Consequence		Inflammatory and infectious upper respiratory diseases			J31: Chronic rhinitis, nasopharyngitis and pharyngitis						Chronic inflammatory sinonasal diseases			J30: Vasomotor and allergic rhinitis			J32: Chronic rhinosinusitis			J33: Nasal polyposis			J34.2: Nasal septal deviation			Pharyngeal diseases			J35: Chronic diseases of tonsils and adenoids			J36: Peritonsillar abscess			J37: Chronic laryngitis and laryngotracheitis			K04: Diseases of pulp and periapical tissues			Previous reports	Nearby GWAS Catalog loci
LOCUS	CHR	POS	Ref	Alt	Nearest gene	rsid		MAF	OR (95 % CI)		p	OR (95 % CI)		p	OR (95 % CI)		p	OR (95 % CI)		p	OR (95 % CI)		p	OR (95 % CI)		p	OR (95 % CI)		p	OR (95 % CI)		p	OR (95 % CI)		p	OR (95 % CI)		p	OR (95 % CI)		p	OR (95 % CI)		p	OR (95 % CI)		p
1p36.23	1	8189495	G	T	SLC45A1	rs12082271	upstream	0.302	0.966697	(0.95 - 0.99)	1.77e-05	0.97378	(0.93 - 1.02)	0.181	0.987973	(0.96 - 1.01)	0.2765	0.986098	(0.96 - 1.02)	0.2562	0.96839	(0.93 - 1.01)	0.0671	1.00133	(0.96 - 1.04)	0.935	0.98999	(0.94 - 1.05)	0.701	0.990921	(0.95 - 1.03)	0.626	0.936224	(0.91 - 0.96)	1.916e-10	0.940503	(0.92 - 0.97)	2.16e-08	0.900676	(0.86 - 0.95)	6.77e-06	1.01866	(0.95 - 1.09)	0.547	0.990822	(0.97 - 1.01)	0.263	-	Strep throat; HDL; hair shape; IBD; Psoriasis
1p31.3	1	67266351	G	A	IL23R	rs192569879	downstream	0.00499	0.821527	(0.74 - 0.91)	0.000135	0.67132	(0.52 - 0.87)	0.00167	0.973167	(0.84 - 1.12)	0.7016	0.973459	(0.83 - 1.14)	0.7317	0.991774	(0.79 - 1.24)	0.941	0.918127	(0.74 - 1.13)	0.411	0.911093	(0.65 - 1.27)	0.578	0.94949	(0.74 - 1.21)	0.667	0.685573	(0.59 - 0.79)	4.662e-08	0.707321	(0.61 - 0.82)	1.9e-06	0.649144	(0.48 - 0.87)	0.00354	1.39431	(0.94 - 2.06)	0.0935	0.971348	(0.87 - 1.08)	0.586	-	Inflammatory Bowel Disease; Ulcerative Colitis; Crohn's disease; Primary biliary cholangitis; Vogt-Kayonagi-Harada syndrome; Leprosy
1q21.3	1	150827641	T	C	ARNT	rs2089081	intronic	0.554	0.96358	(0.94 - 0.98)	3.11e-07	1.01233	(0.97 - 1.05)	0.502	0.971902	(0.95 - 1.00)	0.00523	0.961174	(0.93 - 0.99)	0.000489	0.995072	(0.96 - 1.03)	0.76	0.963185	(0.93 - 1.00)	0.0126	0.858533	(0.81 - 0.90)	2.17e-10	0.990486	(0.95 - 1.03)	0.579	0.95361	(0.93 - 0.98)	6.069e-07	0.951306	(0.93 - 0.98)	7.18e-07	0.963676	(0.92 - 1.01)	0.0834	1.04173	(0.98 - 1.11)	0.149	1.00791	(0.99 - 1.03)	0.298	rs11204735: immune-mediated diseases (Schurman et al 2020), prediabetes and type 2 diabetes (Das et al 2008)	Melanoma; Chronotype; Schizophrenia; Inflammatory skin disease; Allergic disease; Atopic dermatitis; Coronary Artery Disease
1q41	1	221915660	A	G	DUSP10	rs12128267	intronic	0.121	1.03509	(1.01 - 1.06)	0.00184	0.988289	(0.93 - 1.05)	0.673	0.996008	(0.96 - 1.03)	0.7995	0.996805	(0.96 - 1.04)	0.856	1.01847	(0.97 - 1.07)	0.458	0.996078	(0.95 - 1.05)	0.865	0.943244	(0.87 - 1.02)	0.112	0.988665	(0.93 - 1.05)	0.667	1.0968	(1.06 - 1.13)	1.746e-10	1.10519	(1.07 - 1.14)	7.38e-11	1.07497	(1.00 - 1.15)	0.0262	1.00237	(0.91 - 1.10)	0.957	0.988615	(0.96 - 1.02)	0.322	-	Tonsillectomy; Colorectal cancer
2p16.1	2	55220588	C	T	CLHC1	rs548656377	intronic	0.000619	1.56271	(1.16 - 2.10)	0.00262	1.44123	(0.67 - 3.06)	0.341	2.46601	(1.62 - 3.75)	2.295e-05	1.92341	(1.21 - 3.06)	0.005467	2.27775	(1.16 - 4.45)	0.0157	1.82898	(0.98 - 3.41)	0.0571	1.4134	(0.53 - 3.74)	0.485	9.69286	(4.36 - 21.51)	2.33e-08	1.35717	(0.91 - 2.02)	0.1306	1.38863	(0.91 - 2.12)	0.125	1.1404	(0.46 - 2.82)	0.776	0.818911	(0.24 - 2.78)	0.748	1.3542	(0.99 - 1.84)	0.0501	-	Alcohol dependence; Height; Vitiligo; Chronotype; Menarche; Sudden cardiac arrest; BMI
2p13.2	2	71827707	C	T	DYSF	rs35668054	regulatory	0.093	1.01613	(0.99 - 1.05)	0.2	0.952048	(0.89 - 1.02)	0.119	0.973556	(0.94 - 1.01)	0.1286	0.956763	(0.92 - 1.00)	0.02405	0.949889	(0.89 - 1.01)	0.0647	0.994127	(0.94 - 1.05)	0.82	0.857864	(0.79 - 0.94)	0.000229	1.04572	(0.98 - 1.11)	0.133	1.08817	(1.05 - 1.13)	2.184e-07	1.1021	(1.06 - 1.15)	1.78e-08	1.0141	(0.94 - 1.09)	0.703	0.922046	(0.83 - 1.02)	0.1	1.00059	(0.97 - 1.03)	0.964	-	Schizophrenia
2q12.1	2	102316052	G	T	IL18R1,IL1RL1	rs950881	intronic	0.162	0.946873	(0.92 - 0.97)	2.69e-08	0.963744	(0.91 - 1.02)	0.132	0.899515	(0.87 - 0.93)	1.947e-14	0.881968	(0.85 - 0.91)	3.672e-16	0.875579	(0.83 - 0.92)	1.08e-09	0.896148	(0.86 - 0.94)	6.7e-08	0.878157	(0.82 - 0.94)	6.13e-05	0.954927	(0.91 - 1.00)	0.0476	0.9687	(0.94 - 1.00)	0.01343	0.968071	(0.94 - 1.00)	0.0172	0.981621	(0.92 - 1.04)	0.518	1.01734	(0.94 - 1.10)	0.654	0.996317	(0.97 - 1.02)	0.718	-	Inflammatory Bowel Disease; Allergic disease; Asthma; Atopic dermatitis; Celiac disease; Crohn's disease; Leprosy; Ulcerative colitis; Parkinson's disease
2q13	2	111429464	A	G	MIR4435-2HG	rs1045267	non-coding	0.66	0.949177	(0.93 - 0.97)	6.26e-11	0.993203	(0.95 - 1.04)	0.734	0.986196	(0.96 - 1.01)	0.2151	0.984915	(0.96 - 1.01)	0.2247	0.975281	(0.94 - 1.01)	0.159	0.991903	(0.96 - 1.03)	0.623	1.02631	(0.97 - 1.09)	0.327	0.984413	(0.94 - 1.03)	0.409	0.907284	(0.88 - 0.93)	1.416e-20	0.910993	(0.89 - 0.94)	4.09e-17	0.882391	(0.84 - 0.93)	1.07e-07	0.964785	(0.90 - 1.03)	0.253	0.994764	(0.97 - 1.02)	0.529	-	Type 2 Diabetes; Primary Sclerosing Cholangitis; Rheumatoid arthritis; Allergic disease
2q22.3	2	145755293	A	G	ZEB2	rs16825450	regulatory	0.1025	0.964042	(0.94 - 0.99)	0.00211	0.95911	(0.90 - 1.02)	0.161	0.903572	(0.87 - 0.94)	1.686e-09	0.903481	(0.87 - 0.94)	5.57e-08	0.950535	(0.90 - 1.01)	0.0545	0.893776	(0.85 - 0.94)	5.47e-06	0.817144	(0.75 - 0.89)	3.61e-07	0.881077	(0.83 - 0.94)	8.61e-06	1.0026	(0.97 - 1.04)	0.8662	1.00173	(0.96 - 1.04)	0.917	1.01185	(0.94 - 1.09)	0.735	1.03105	(0.94 - 1.14)	0.515	1.02139	(0.99 - 1.05)	0.0889		Schizophrenia; Photic sneeze reflex; Coronary Artery Disease; Crohn's Disease; Epilepsy (generalized); Renal cell carcinoma
2q33.3	2	206557414	A	G	ADAM23	rs189411872	intronic	0.0128	1.20008	(1.12 - 1.28)	1.87e-08	1.02147	(0.86 - 1.21)	0.797	1.13202	(1.03 - 1.24)	0.007259	1.14683	(1.03 - 1.27)	0.007547	1.16897	(1.01 - 1.35)	0.0321	1.1357	(0.99 - 1.30)	0.063	1.27664	(1.03 - 1.58)	0.0233	1.0324	(0.88 - 1.21)	0.687	1.40284	(1.28 - 1.53)	3.065e-15	1.52609	(1.39 - 1.67)	2.31e-20	0.800235	(0.66 - 0.97)	0.0225	0.997683	(0.77 - 1.30)	0.986	0.995898	(0.93 - 1.07)	0.903	-	Tonsillectomy; BMI; Episodic memory
3q12.3	3	101940101	G	A	NFKBIZ	rs1456200	upstream	0.376	1.02893	(1.01 - 1.05)	0.000135	0.991685	(0.95 - 1.03)	0.657	1.01847	(0.99 - 1.04)	0.08226	1.02051	(0.99 - 1.05)	0.08285	1.04556	(1.01 - 1.09)	0.00736	0.994545	(0.96 - 1.03)	0.724	1.01216	(0.96 - 1.07)	0.625	1.02252	(0.98 - 1.06)	0.21	1.03977	(1.01 - 1.06)	7.097e-05	1.02766	(1.00 - 1.05)	0.00869	1.13475	(1.08 - 1.19)	9.36e-09	1.02536	(0.96 - 1.09)	0.39	1.00921	(0.99 - 1.03)	0.24	-	Psoriasis; Anxiety Disorder; Multiple Sclerosis; Allergic disease; Inflammatory Bowel Disease
3q13.12	3	106701452	G	T	CCDC54	rs187688516	intergenic	0.0167	0.854422	(0.80 - 0.91)	3.72e-08	0.894107	(0.77 - 1.03)	0.115	0.890564	(0.82 - 0.97)	0.003622	0.902398	(0.82 - 0.99)	0.02044	0.92502	(0.81 - 1.05)	0.214	0.889194	(0.79 - 1.00)	0.0444	0.940108	(0.78 - 1.13)	0.508	0.852988	(0.74 - 0.98)	0.0175	0.828366	(0.76 - 0.90)	4.986e-07	0.829261	(0.76 - 0.90)	2.19e-06	0.800075	(0.67 - 0.95)	0.00784	0.817618	(0.66 - 1.01)	0.0584	1.00074	(0.94 - 1.07)	0.98	-	Multiple sclerosis; Neuroticism; Waist-to-hip ratio adjusted for BMI
3q21.2	3	125192997	C	T	SLC12A8	rs1980080	intronic	0.653	0.957969	(0.94 - 0.98)	1.52e-08	0.961097	(0.92 - 1.00)	0.0379	0.977458	(0.95 - 1.00)	0.03285	0.980689	(0.95 - 1.01)	0.1019	0.970601	(0.93 - 1.01)	0.0779	0.98823	(0.95 - 1.02)	0.453	0.954536	(0.90 - 1.01)	0.0643	0.962588	(0.92 - 1.00)	0.0346	0.932953	(0.91 - 0.96)	2.968e-12	0.941322	(0.92 - 0.97)	9.37e-09	0.881703	(0.84 - 0.93)	1.82e-08	1.01157	(0.95 - 1.08)	0.698	1.00948	(0.99 - 1.03)	0.233	-	Tonsillectomy; Coronary Artery Disease
4q24a	4	102593836	A	G	NFKB1	rs4648051	intronic	0.32	0.953038	(0.93 - 0.97)	4.88e-10	0.982308	(0.94 - 1.03)	0.358	0.958774	(0.93 - 0.98)	0.0001087	0.961078	(0.93 - 0.99)	0.001006	0.953506	(0.92 - 0.99)	0.0055	0.960424	(0.93 - 1.00)	0.0116	0.978602	(0.93 - 1.03)	0.397	0.971582	(0.93 - 1.01)	0.116	0.937724	(0.91 - 0.96)	2.23e-10	0.935785	(0.91 - 0.96)	6.23e-10	0.948532	(0.90 - 1.00)	0.0199	0.99547	(0.93 - 1.06)	0.881	1.00285	(0.98 - 1.02)	0.724	rs3774964: susceptibility to ovarian cancer (Chen, Cai, Liang 2015), gastric cancer (Hua et al 2014), coronary artery disease (Guo et al 2016), recurrent embryo implantation failure (Luo et al 2016), colorectal cancer (Yu et al 2012)	Tonsillectomy; Ulcerative colitis; Neutrophil percentage; Primary biliary cholangitis
4q24b	4	105129808	G	GC	TET2	rs5860793	intergenic	0.716	1.04997	(1.03 - 1.07)	1.24e-09	1.06369	(1.02 - 1.11)	0.00221	1.03386	(1.01 - 1.06)	0.003201	1.03355	(1.00 - 1.06)	0.008639	1.0301	(0.99 - 1.07)	0.0956	1.04955	(1.01 - 1.09)	0.00365	0.996018	(0.94 - 1.05)	0.881	1.01788	(0.98 - 1.06)	0.352	1.07972	(1.05 - 1.11)	3.597e-13	1.07965	(1.05 - 1.11)	6.79e-12	1.08217	(1.03 - 1.14)	0.000816	1.0595	(0.99 - 1.13)	0.0643	1.00889	(0.99 - 1.03)	0.291	-	Tonsillectomy; Intelligence; Breast cancer; Plateletcrit; Ulcerative colitis
4q25	4	112220279	T	C	AP1AR	rs6824923	intergenic	0.166	0.958793	(0.94 - 0.98)	1.59e-05	1.00677	(0.95 - 1.06)	0.783	0.983537	(0.95 - 1.02)	0.2261	0.974043	(0.94 - 1.01)	0.08437	1.00139	(0.95 - 1.05)	0.949	0.964351	(0.92 - 1.01)	0.0726	0.934232	(0.87 - 1.00)	0.0355	1.01494	(0.97 - 1.07)	0.52	0.930717	(0.90 - 0.96)	1.972e-08	0.932002	(0.90 - 0.96)	2.01e-07	0.93122	(0.88 - 0.99)	0.0128	0.932767	(0.86 - 1.01)	0.0652	1.01151	(0.99 - 1.04)	0.261	-	BMI; Photic sneeze reflex; Myopia (pathological); Parkinson's disease; Atrial fibrillation or flutter
5p13.2	5	35873022	T	TT	IL7R	rs11406102	intronic	0.33	0.957854	(0.94 - 0.98)	2.12e-08	0.971863	(0.93 - 1.01)	0.139	0.94819	(0.92 - 0.97)	8.918e-07	0.940259	(0.91 - 0.97)	3.022e-07	0.935466	(0.90 - 0.97)	9.22e-05	0.94693	(0.91 - 0.98)	0.000608	0.887098	(0.84 - 0.94)	2.59e-06	0.958323	(0.92 - 1.00)	0.0199	0.954946	(0.93 - 0.98)	4.924e-06	0.955653	(0.93 - 0.98)	2.15e-05	0.945653	(0.90 - 0.99)	0.0134	0.94856	(0.89 - 1.01)	0.0792	0.980748	(0.96 - 1.00)	0.0154	rs11567705: multiple sclerosis (Raji et al 2012); rs10213865: breast cancer susceptibility (Wang et al 2020); lung cancer (Zhang et al 2019); sarcoid inflammation (Heron et al 2009)	Allergic disease; Primary biliary cholangitis; Advanced age-related maculodegeneration; Height
5q21.3a	5	109553994	G	A	MAN2A1	rs7737074	regulatory	0.628	0.972349	(0.95 - 0.99)	0.000182	0.981965	(0.94 - 1.02)	0.335	0.943556	(0.92 - 0.97)	3.699e-08	0.942707	(0.92 - 0.97)	4.983e-07	0.945114	(0.91 - 0.98)	0.000703	0.94167	(0.91 - 0.98)	0.000111	0.959608	(0.91 - 1.01)	0.0967	0.944594	(0.91 - 0.98)	0.00139	0.983439	(0.96 - 1.01)	0.08875	0.986956	(0.96 - 1.01)	0.207	0.967065	(0.92 - 1.01)	0.129	0.99376	(0.93 - 1.06)	0.831	1.01059	(0.99 - 1.03)	0.178	-	Schizophrenia; Intelligence; Alzheimer's disease; Neuroticism; Allergic disease; Asthma
5q21.3b	5	110116253	A	T	TMEM232	rs187769944	intergenic	0.0224	1.06943	(1.01 - 1.13)	0.00604	1.10525	(0.97 - 1.25)	0.105	1.2141	(1.13 - 1.30)	1.465e-08	1.24745	(1.15 - 1.35)	5.884e-09	1.22746	(1.10 - 1.37)	0.000141	1.3381	(1.21 - 1.48)	1.15e-08	1.17337	(1.00 - 1.38)	0.0468	1.19768	(1.06 - 1.35)	0.00219	1.00371	(0.94 - 1.07)	0.9079	1.00615	(0.94 - 1.08)	0.858	1.02737	(0.89 - 1.19)	0.708	0.901324	(0.74 - 1.10)	0.301	1.04624	(0.99 - 1.11)	0.0773	-	Allergic disease; Allergic sensitization; Asthma
5q22.1	5	111066174	T	C	TSLP	rs1837253	upstream	0.754	1.05064	(1.03 - 1.07)	6.66e-09	1.04189	(0.99 - 1.09)	0.0551	1.1023	(1.07 - 1.13)	5.764e-16	1.12626	(1.09 - 1.16)	7.768e-19	1.10184	(1.06 - 1.15)	3.17e-07	1.13016	(1.09 - 1.18)	5.06e-12	1.26021	(1.19 - 1.34)	6.62e-16	1.05127	(1.01 - 1.10)	0.0134	1.03417	(1.01 - 1.06)	0.002621	1.03362	(1.00 - 1.06)	0.00511	1.0258	(0.97 - 1.08)	0.309	1.02748	(0.96 - 1.10)	0.415	0.996576	(0.97 - 1.02)	0.7	rs1837253: Asthma (Sun et al 2019, Moorehead et al 2020, Hunninghake et al 2010, Li et al 2015, He et al 2009), TSLP secretion (Hui et al 2015), Eczema (Miyake et al 2015), Atopic dermatitis (Jiang et al 2017), Allergic rhinitis in asthma (Bunyavanich et al 2011); rs1438673: allergic rhinitis and allergy (Gao et al 2020)	Allergic disease; Self-reported allergy; Asthma; Eosinophilic esophagitis; Menarche; Breast cancer
5q31.1a	5	131381397	C	T	CDC42SE2	rs11738827	intronic	0.273	0.987825	(0.97 - 1.01)	0.131	0.996466	(0.95 - 1.04)	0.863	0.97453	(0.95 - 1.00)	0.0244	0.967055	(0.94 - 1.00)	0.008532	0.997842	(0.96 - 1.04)	0.905	0.960732	(0.92 - 1.00)	0.0175	0.855859	(0.81 - 0.91)	9.85e-09	0.98221	(0.94 - 1.03)	0.352	1.00995	(0.98 - 1.04)	0.3535	1.00985	(0.98 - 1.04)	0.383	1.00324	(0.95 - 1.06)	0.893	1.00289	(0.94 - 1.07)	0.927	1.02948	(1.01 - 1.05)	0.000612	-	Crohn's disease; Mosquito bite size; Itch intensity from mosquite bite adjusted by bite size; Atopic dermatitis; Hodgkin's lymphoma; Subjective well-being
5q31.1b	5	132336964	T	C	SLC22A4	rs56399423	intronic	0.317	0.987943	(0.97 - 1.01)	0.118	0.984295	(0.94 - 1.03)	0.418	0.963098	(0.94 - 0.99)	0.0005949	0.957337	(1.04 - 0.88)	0.0003406	0.973692	(0.94 - 1.01)	0.123	0.949424	(0.91 - 0.98)	0.00127	0.858173	(0.81 - 0.91)	3.14e-09	0.957883	(0.92 - 1.00)	0.0197	1.02173	(1.00 - 1.05)	0.03418	1.02825	(1.00 - 1.06)	0.00956	0.986847	(0.94 - 1.04)	0.563	0.992181	(0.93 - 1.06)	0.795	1.02784	(1.01 - 1.05)	0.000705	-	Inflammatory Bowel Disease; Crohn's disease; Mosquito bite size; Itch intensity from mosquite bite adjusted by bite size; Rheumatoid arthritis; Giant cell arteritis; Coronary Artery disease
6p22-p21	6	25-33 Mb	-	-	HLA	-	-	-	1.06545	(1.04 - 1.09)	3.87e-12	0.570165	(0.41 - 0.78)	0.000319	1.10905	(1.08 - 1.14)	9.502e-16	1.13815	(1.10 - 1.18)	1.937e-19	1.1015	(1.06 - 1.14)	3.4e-08	1.16928	(1.13 - 1.21)	1.68e-23	1.4465	(1.36 - 1.54)	6.23e-32	0.920066	(0.88 - 0.96)	5.52e-06	1.15835	(1.10 - 1.21)	1.755e-11	1.18146	(1.12 - 1.24)	4.55e-12	0.876902	(0.82 - 0.94)	2.67e-05	1.12887	(1.06 - 1.21)	0.000135	2.60682	(1.79 - 3.80)	5.47e-07	#N/A	#N/A
7p12.2	7	50250073	C	A	IKZF1	rs55935382	intergenic	0.314	0.964467	(0.94 - 0.98)	3.17e-06	0.954746	(0.91 - 1.00)	0.0176	0.985605	(0.96 - 1.01)	0.1833	0.985112	(0.96 - 1.01)	0.2158	0.991447	(0.95 - 1.03)	0.618	0.976149	(0.94 - 1.01)	0.133	0.996197	(0.94 - 1.05)	0.882	0.987775	(0.95 - 1.03)	0.504	0.942801	(0.92 - 0.97)	7.752e-09	0.944452	(0.92 - 0.97)	1.21e-07	0.936393	(0.89 - 0.98)	0.00398	0.911148	(0.85 - 0.97)	0.00211	1.01563	(0.99 - 1.04)	0.0554	-	Tonsillectomy; SLE; Mosquito bite size; Crohn's disease; Ulcerative colitis; Acute lymphoblastic leukemia (childhood); BMI; Type 1 diabetes; Late-onset Alzheimer's disease
8p11.21	8	42424332	G	C	SLC20A2	rs73631760	intronic	0.0939	1.05096	(1.02 - 1.08)	6.08e-05	1.01606	(0.95 - 1.09)	0.61	1.01461	(0.98 - 1.06)	0.4058	1.02347	(0.98 - 1.07)	0.2321	1.02	(0.96 - 1.08)	0.474	1.0273	(0.97 - 1.09)	0.295	1.03767	(0.95 - 1.13)	0.367	0.972797	(0.91 - 1.04)	0.353	1.09232	(1.05 - 1.13)	5.441e-08	1.10943	(1.07 - 1.15)	1.61e-09	1.01521	(0.94 - 1.10)	0.68	1.06383	(0.96 - 1.18)	0.208	0.9995	(0.97 - 1.03)	0.969	-	Pulse pressure
9p24.1	9	6192796	T	C	IL33	rs2095044	upstream	0.76	0.948295	(0.93 - 0.97)	3.34e-10	0.958764	(0.91 - 1.00)	0.0479	0.879677	(0.85 - 0.91)	7.217e-27	0.858645	(0.83 - 0.89)	2.269e-30	0.901703	(0.86 - 0.94)	3.85e-08	0.866884	(0.83 - 0.90)	4.61e-16	0.695545	(0.65 - 0.74)	1.99e-36	0.9238	(0.88 - 0.97)	8.59e-05	0.993422	(0.97 - 1.02)	0.5542	0.994038	(0.97 - 1.02)	0.611	0.98663	(0.93 - 1.04)	0.59	0.966775	(0.90 - 1.04)	0.309	1.00759	(0.99 - 1.03)	0.393	rs2095044, rs928413, rs3939286, rs7848215, rs2381416, rs992969, rs1888909: Hay fever (Schröder et al 2016); rs928413: COPD (Xu et al 2020), IL33 promotion in lung epithelial cells (Gorbacheva et al 2018), atopic asthma (Chen et al 2015, Matloubi et al 2020); rs3939286: subclinical atherosclerosis in rheumatoid arthritis (López-Mejías et al 2015), nasal polyposis (Buysshaert et al 2010), gout (Liu…	Asthma; Allergic disease; Survival in osteosarcoma
9q33.3	9	124307465	C	T	NEK6	rs3758213	intronic	0.381	0.95361	(0.93 - 0.97)	1.75e-10	0.941774	(0.90 - 0.98)	0.00134	0.944594	(0.92 - 0.97)	5.384e-08	0.93688	(0.91 - 0.96)	2.318e-08	0.910747	(0.88 - 0.95)	1.65e-08	0.935551	(0.90 - 0.97)	1.58e-05	0.955969	(0.91 - 1.01)	0.0671	0.965789	(0.93 - 1.00)	0.0484	0.953515	(0.93 - 0.98)	1.105e-06	0.955281	(0.93 - 0.98)	9.58e-06	0.940043	(0.90 - 0.99)	0.00473	0.9882	(0.93 - 1.05)	0.682	1.00083	(0.98 - 1.02)	0.915	-	Vitiligo; Polycystic ovarian syndrome; Menarche; Myopia (pathological)
9q34.2	9	133261662	G	A	ABO	rs950529388	intronic	0.564	0.96902	(0.95 - 0.99)	1.47e-05	0.971543	(0.93 - 1.01)	0.114	0.98738	(0.96 - 1.01)	0.2144	0.982751	(0.96 - 1.01)	0.1269	0.964631	(0.93 - 1.00)	0.0256	1.01516	(0.98 - 1.05)	0.595	1.03209	(0.98 - 1.09)	0.189	1.00928	(0.97 - 1.05)	0.592	0.94167	(0.92 - 0.96)	2.885e-10	0.93747	(0.91 - 0.96)	1.58e-10	0.958275	(0.91 - 1.00)	0.0462	0.992349	(0.93 - 1.05)	0.787	0.99983	(0.98 - 1.02)	0.982	rs687621: autoimmune thyroid diseases (Martin et al 2020), adolescent idiopathic scoliosis (Wu et al 2019, Khanshour et al 2018)	Venous thromboembolism; Tonsillectomy; Type 2 diabetes
10p14a	10	8073399	C	A	GATA3	rs10905284	intronic	0.58	0.993183	(0.97 - 1.01)	0.352	1.00288	(0.96 - 1.04)	0.876	0.966958	(0.94 - 0.99)	0.001156	0.954087	(0.93 - 0.98)	4.387e-05	0.964959	(0.93 - 1.00)	0.0287	1.01534	(0.98 - 1.05)	0.00262	0.873314	(0.83 - 0.92)	2.62e-08	0.993829	(0.96 - 1.03)	0.723	1.01076	(0.99 - 1.03)	0.2668	1.00299	(0.98 - 1.03)	0.768	1.06811	(1.02 - 1.12)	0.00229	1.02784	(0.97 - 1.09)	0.339	0.993392	(0.97 - 1.01)	0.388	rs10905284: Moderate-to-severe asthma (Shrine et al 2019), Leprosy resistance (Medeiros et al 2016); rs568727: breast cancer treatment outcome (Larsen et al 2019); rs570613: breast cancer (Garcia-Closas et al 2007, Johnatty et al 2009)	Rheumatoid arthritis; Hodgkin's lymphoma; Acute lymphoblastic leukemia; Colorectal cancer; Selective IgA deficiency; Allergic disease
10p14b	10	9015282	T	C	GATA3	rs1663680	regulatory	0.3022	0.974803	(0.95 - 0.99)	0.00117	0.994316	(0.95 - 1.04)	0.773	0.925705	(0.9 - 0.95)	3.34e-12	0.908464	(0.88 - 0.94)	7.34e-15	0.924622	(0.89 - 0.96)	7.43e-06	0.916521	(0.88 - 0.95)	9.38e-08	0.822884	(0.78 - 0.87)	1.07e-13	0.951515	(0.91 - 0.99)	0.00779	1.00411	(0.98 - 1.03)	0.694	1.00544	(0.98 - 1.03)	0.618	0.986601	(0.94 - 1.04)	0.56	1.04046	(0.98 - 1.11)	0.193	0.987617	(0.97 - 1.01)	0.129	-	Asthma; Mild influenza; Allergic disease; Basal cell carcinoma; Breast cancer; Colorectal cancer; Acute lymphoblastic leukemia; Hodgkin's lymphoma; Rheumatoid arthritis
11q13.5	11	76585627	A	G	EMSY	rs10160518	intergenic	0.438	1.03332	(1.01 - 1.05)	6.42e-06	1.00057	(0.96 - 1.04)	0.975	1.06269	(1.04 - 1.09)	2.788e-09	1.06865	(1.04 - 1.10)	5.299e-09	1.09413	(1.06 - 1.13)	2.57e-08	1.01519	(0.98 - 1.05)	0.0114	1.08483	(1.03 - 1.14)	0.000722	1.03738	(1.00 - 1.08)	0.0336	1.02706	(1.00 - 1.05)	0.005168	1.02698	(1.00 - 1.05)	0.00837	1.03228	(0.98 - 1.08)	0.138	1.02932	(0.97 - 1.09)	0.308	1.00807	(0.99 - 1.03)	0.289	rs10160518: Giant cell arterititis (Carmona et al 2015); rs7936070: childhood asthma (Chen et al 2020)	Inflammatory bowel disease; Allergic disease; Asthma; Eosinophilic esophagitis; Endometriosis; Coronary artery disease
12p13.31a	12	6384185	A	G	LTBR	rs10849448	5 prime UTR	0.755	0.936309	(0.92 - 0.96)	7.68e-15	1.00297	(0.96 - 1.05)	0.889	0.969088	(0.94 - 1.00)	0.00855	0.972777	(0.94 - 1.00)	0.03786	1.01031	(0.97 - 1.05)	0.587	0.959896	(0.92 - 1.00)	0.0198	0.971873	(0.91 - 1.03)	0.309	0.955023	(0.91 - 1.00)	0.0224	0.899605	(0.88 - 0.92)	1.787e-22	0.899281	(0.87 - 0.93)	2.05e-19	0.862664	(0.82 - 0.91)	3.88e-09	1.03015	(0.96 - 1.10)	0.37	1.01813	(1.00 - 1.04)	0.0422	rs12354: chronic hepatitis B virus infection and related hepatocellular carcinoma (Zhu et al 2017); rs2364480: prostate volume in benign prostatic hyperplasia (Lee et al 2015), IgA nephropathy (Kim et al 2012)	Tonsillectomy; Ankylosing spondylitis; Crohn's Disease; Primary biliary cholangitis; Multiple Sclerosis; Colorectal cancer
12p13.31b	12	9393496	A	G	PZP	rs967884772	intronic	0.0106	1.22551	(1.14 - 1.32)	1.15e-08	0.99963	(0.83 - 1.20)	0.997	1.23875	(1.12 - 1.37)	2.297e-05	1.26377	(1.13 - 1.42)	2.998e-05	1.23409	(1.05 - 1.45)	0.00796	1.32524	(1.14 - 1.54)	0.000164	1.14	(0.90 - 1.45)	0.273	1.16252	(0.97 - 1.38)	0.0841	1.22434	(1.11 - 1.35)	1.73e-05	1.20819	(1.09 - 1.34)	0.000154	1.30304	(1.05 - 1.61)	0.0121	1.27373	(0.95 - 1.70)	0.0953	0.934943	(0.86 - 1.01)	0.0708	-	Multiple sclerosis; Type 1 Diabetes; Behcet's Disease; Myopia; Psoriasis
12q13.2	12	55996852	A	G	RAB5B	rs705702	upstream	0.303	1.00756	(0.99 - 1.03)	0.338	0.995998	(0.95 - 1.04)	0.839	1.04394	(1.02 - 1.07)	0.0001001	1.0477	(1.02 - 1.08)	0.0001519	1.01959	(0.98 - 1.06)	0.269	1.05626	(1.02 - 1.10)	0.000781	1.15403	(1.09 - 1.22)	3.67e-08	1.04864	(1.01 - 1.09)	0.0109	0.989555	(0.96 - 1.01)	0.308	0.991387	(0.97 - 1.02)	0.429	0.983685	(0.94 - 1.03)	0.478	0.965673	(0.90 - 1.03)	0.253	1.00243	(0.98 - 1.02)	0.767	rs705702: PCOS (Bakhashab & Ahmed 2019, Sun et al 2016, Saxena et al 2015); rs772920: PCOS (Jia et al 2019)	Polycystic ovarian syndrome; Vitiligo; Type 1 diabetes; Rheumatoid arthritis; Asthma; Non-syndromic cleft palate with cleft lip; Inflammatory skin disease; Anorexia nervosa; Psoriasis; Immune response to small pox; Menopause; Advanced age-related macular degeneration
13q14.11	13	40567095	T	C	FOXO1	rs2701859	intronic	0.286	1.02984	(1.01 - 1.05)	0.000231	1.01383	(0.97 - 1.06)	0.494	1.05844	(1.03 - 1.09)	4.368e-07	1.07519	(1.04 - 1.11)	6.62e-09	1.07295	(1.03 - 1.12)	7.37e-05	1.07287	(1.03 - 1.11)	2.13e-05	1.08863	(1.03 - 1.15)	0.00134	1.03374	(0.99 - 1.08)	0.0803	1.0199	(0.99 - 1.05)	0.06089	1.02408	(1.00 - 1.05)	0.0321	0.99373	(0.94 - 1.05)	0.789	1.03281	(0.97 - 1.10)	0.299	0.994764	(0.97 - 1.02)	0.529		Allergic disease; Ulcerative colitis; SLE; Inflammatory bowel disease; Crohn's disease; Rheumatoid arthritis; Psoriasis
13q21.33	13	70005395	T	C	KLHL1	rs9542155	intronic	0.643	0.959618	(0.94 - 0.98)	4.6e-08	1.00088	(0.96 - 1.04)	0.963	0.979709	(0.95 - 1.01)	0.05313	0.977849	(0.95 - 1.01)	0.0585	0.99548	(0.96 - 1.03)	0.787	0.97823	(0.94 - 1.01)	0.159	0.938268	(0.89 - 0.99)	0.0107	0.991586	(0.95 - 1.03)	0.638	0.939037	(0.92 - 0.96)	2.022e-10	0.954479	(0.93 - 0.98)	8.67e-06	0.848776	(0.81 - 0.89)	1.56e-13	0.955682	(0.90 - 1.02)	0.125	1.00094	(0.98 - 1.02)	0.905	-	Tonsillectomy; Photic sneeze reflex; Neuroticism; Intelligence
14q21.1	14	39920670	A	G	FBXO33	rs112672184	intergenic	0.00236	1.56921	(1.34 - 1.83)	8.73e-09	1.21583	(0.81 - 1.83)	0.344	1.65665	(1.32 - 2.07)	8.696e-06	1.65798	(1.29 - 2.13)	6.76e-05	1.75748	(1.23 - 2.51)	0.00189	1.54651	(1.11 - 2.15)	0.00884	1.36845	(0.79 - 2.35)	0.253	1.38804	(0.95 - 2.02)	0.0836	1.72375	(1.40 - 2.12)	1.889e-07	1.69476	(1.36 - 2.11)	1.91e-06	1.97189	(1.88 - 2.07)	0.00491	1.16019	(0.62 - 2.17)	0.641	1.32057	(1.12 - 1.56)	0.000696	-	-
14q31.1	14	79848307	C	A	NRXN3	rs1022434	intronic	0.929	1.06013	(1.03 - 1.09)	3.53e-05	1.12398	(1.04 - 1.21)	0.000954	1.12524	(1.08 - 1.18)	3.473e-09	1.12277	(1.07 - 1.18)	1.851e-07	1.09496	(1.02 - 1.17)	0.0038	1.11651	(1.05 - 1.19)	0.000168	1.20051	(1.09 - 1.32)	0.000102	1.14459	(1.07 - 1.23)	5.41e-05	1.03977	(1.00 - 1.08)	0.03485	1.04439	(1.00 - 1.09)	0.0262	1.01624	(0.93 - 1.11)	0.698	0.971465	(0.87 - 1.08)	0.589	1.00739	(0.97 - 1.04)	0.616		BMI; Obesity; Mild influenza (H1N1) infection; Grave's disease
14q32.33	14	104740994	G	A	ADSSL1	rs551502318	intronic	0.00158	1.37829	(1.14 - 1.67)	0.000739	1.19573	(0.73 - 1.94)	0.468	1.0021	(0.76 - 1.32)	0.9877	1.04739	(0.77 - 1.42)	0.7647	1.33509	(0.87 - 2.05)	0.185	0.871691	(0.58 - 1.31)	0.506	0.781742	(0.41 - 1.49)	0.452	0.671058	(0.42 - 1.08)	0.0945	1.9558	(1.52 - 2.51)	1.03e-07	2.10809	(1.61 - 2.75)	3.37e-08	1.18527	(0.68 - 2.07)	0.547	1.02444	(0.47 - 2.24)	0.951	1.0022	(0.82 - 1.22)	0.982	-	Breast cancer; Endometrial cancer
15q22.33	15	67150258	C	T	SMAD3	rs17293632	intronic	0.262	1.04656	(1.02 - 1.07)	2.63e-08	1.03618	(0.99 - 1.08)	0.0854	1.0662	(1.04 - 1.10)	2.66e-08	1.08156	(1.05 - 1.11)	9.382e-10	1.10311	(1.06 - 1.15)	7.03e-08	1.06333	(1.02 - 1.10)	0.000297	1.11565	(1.05 - 1.18)	5.63e-05	1.05199	(1.01 - 1.10)	0.00933	1.03645	(1.01 - 1.06)	0.0008629	1.03651	(1.01 - 1.06)	0.00161	1.05253	(1.00 - 1.11)	0.0339	1.06765	(1.00 - 1.14)	0.042	1.00339	(0.98 - 1.03)	0.692	rs17293632: IBD (Jostins et al 2012), coronary artery disease (Turner et al 2016), papillary thyroid carcinoma (Wang et al 2018); rs17293632, rs56062135: coronary artery disease (Turner et al 2016); rs56062135: thyroid cancer (Gudmundsson et al 2017)	Asthma; Self-reported allergy; Thyroid cancer; Menarche; Motion sickness; Restless legs syndrome; Obesity; Testicular germ cell tumor; Dupuytren's disease; Educational attainment
16p13.13	16	11125562	A	G	CLEC16A	rs8064154	intronic	0.3106	0.963512	(0.94 - 0.98)	1.96e-06	0.961616	(0.92 - 1.00)	0.0457	0.941388	(0.92 - 0.97)	4e-08	0.934447	(0.91 - 0.96)	2.877e-08	0.942631	(0.91 - 0.98)	0.000661	0.92988	(0.90 - 0.96)	6.96e-06	0.861345	(0.81 - 0.91)	8.01e-09	0.954946	(0.92 - 1.00)	0.013	0.974043	(0.95 - 1.00)	0.01029	0.975807	(0.95 - 1.00)	0.024	0.953229	(0.91 - 1.00)	0.0371	0.996805	(0.93 - 1.06)	0.917	1.01237	(0.99 - 1.03)	0.132	-	Asthma; Type 1 diabetes; Allergy; Atopic dermatitis; Inflammatory bowel disease; Celiac disease; Leprosy; Allergic disease; Nasopharyngeal carcinoma; Hepatitis; Rheumatoid arthritis; Schizophrenia
16p12.1	16	27305654	G	A	IL4R	rs74630264	regulatory	0.0814	0.98337	(0.95 - 1.01)	0.206	0.930531	(0.87 - 1.00)	0.0305	0.912835	(0.87 - 0.95)	1.129e-06	0.889496	(0.85 - 0.93)	2.02e-08	0.875789	(0.82 - 0.93)	7.03e-06	0.910374	(0.86 - 0.97)	0.000632	0.858628	(0.78 - 0.94)	0.000548	0.959887	(0.90 - 1.03)	0.194	1.01643	(0.98 - 1.06)	0.3458	1.01324	(0.97 - 1.06)	0.474	1.05328	(0.97 - 1.14)	0.178	0.960597	(0.86 - 1.07)	0.444	1.00797	(0.98 - 1.04)	0.566		Allergic disease
16p11.2	16	30495944	T	G	ITGAL	rs6565189	intronic	0.709	0.960424	(0.94 - 0.98)	4.03e-07	0.955042	(0.91 - 1.00)	0.0218	0.973459	(0.95 - 1.00)	0.01666	0.977458	(0.95 - 1.01)	0.06821	0.985664	(0.95 - 1.03)	0.416	0.967442	(0.93 - 1.00)	0.0454	0.980101	(0.93 - 1.04)	0.446	0.967848	(0.93 - 1.01)	0.0843	0.939225	(0.92 - 0.96)	1.989e-09	0.941218	(0.92 - 0.97)	4.48e-08	0.938221	(0.89 - 0.99)	0.00661	1.01511	(0.95 - 1.08)	0.63	0.99971	(0.98 - 1.02)	0.972	-	Ulcerative colitis; Tonsillectomy; SLE; BMI; Schizophrenia; Menarche; Dementia with Lewy antibodies; Psoriasis vulgaris
16q22.1	16	67646903	G	A	CARMIL2	rs117556162	missense	0.0468	0.951791	(0.92 - 0.99)	0.0039	0.951496	(0.87 - 1.04)	0.245	1.03386	(0.98 - 1.09)	0.1631	1.05643	(1.00 - 1.12)	0.03878	1.0601	(0.98 - 1.15)	0.122	1.04706	(0.97 - 1.13)	0.191	1.08948	(0.97 - 1.22)	0.128	0.944273	(0.87 - 1.03)	0.188	0.88232	(0.84 - 0.93)	3.21e-08	0.875561	(0.83 - 0.92)	2.92e-08	0.910174	(0.82 - 1.01)	0.061	1.09448	(0.96 - 1.25)	0.17	0.977781	(0.94 - 1.02)	0.208	-	Waist circumference; Schizophrenia
17p11.2	17	16939881	C	G	TNFRSB13B	rs573841223	non-coding	0.0247	1.20873	(1.15 - 1.27)	1.41e-15	1.11766	(0.99 - 1.26)	0.067	1.04029	(0.97 - 1.12)	0.245	1.04071	(0.96 - 1.13)	0.2908	0.967887	(0.87 - 1.08)	0.545	1.11356	(1.00 - 1.23)	0.031	0.92741	(0.79 - 1.09)	0.346	0.998751	(0.89 - 1.12)	0.983	1.42234	(1.33 - 1.52)	4.543e-29	1.42661	(1.33 - 1.53)	2.37e-26	1.45332	(1.26 - 1.68)	2.25e-07	0.980346	(0.81 - 1.19)	0.835	1.0303	(0.98 - 1.09)	0.226	rs72553883: Common variable immunodeficiency (Lee et al 2009)	Tonsillectomy; Multiple myeloma
17q11.2	17	28534546	C	T	FOXN1	rs2286521	splice region	0.0845	1.04362	(1.01 - 1.08)	0.000999	1.04355	(0.97 - 1.12)	0.192	0.994913	(0.95 - 1.04)	0.7822	1.00421	(0.96 - 1.05)	0.8364	0.980914	(0.92 - 1.04)	0.506	1.00988	(0.95 - 1.07)	0.715	1.00634	(0.92 - 1.10)	0.883	0.976842	(0.91 - 1.04)	0.45	1.10407	(1.06 - 1.15)	5.702e-09	1.0987	(1.06 - 1.14)	1.73e-07	1.125	(1.04 - 1.22)	0.0021	0.94009	(0.85 - 1.04)	0.225	1.00682	(0.98 - 1.04)	0.616	-	Tonsillectomy; ALS; Advanced age-related macular degeneration; Psoriasis; Coronary artery diseases; Crohn's disease; Chronic myeloid leukemia
17q12	17	35745536	G	A	GAS2L2,TAF15	rs3744374	missense	0.0229	0.956504	(0.94 - 0.98)	2.2e-07	0.994853	(0.95 - 1.04)	0.811	0.947053	(0.92 - 0.97)	6.689e-06	0.937067	(0.91 - 0.97)	1.328e-06	0.964293	(0.92 - 1.01)	0.0563	0.896829	(0.86 - 0.93)	9.94e-10	0.936843	(0.88 - 1.00)	0.0216	0.968458	(0.93 - 1.01)	0.116	0.949424	(0.92 - 0.98)	4.078e-06	0.943216	(0.92 - 0.97)	9.45e-07	0.978945	(0.93 - 1.03)	0.399	0.957892	(0.89 - 1.03)	0.199	0.991258	(0.97 - 1.01)	0.327	-	Inflammatory Bowel Disease; Ulcerative Colitis
17q21.1	17	39829548	A	G	IKZF3	rs3816470	intronic	0.569	0.988734	(0.97 - 1.01)	0.12	0.98741	(0.95 - 1.03)	0.49	0.949044	(0.93 - 0.97)	3.328e-07	0.937536	(0.91 - 0.96)	1.568e-08	0.940739	(0.91 - 0.98)	0.000164	0.932851	(0.90 - 0.97)	4.23e-06	0.897924	(0.85 - 0.95)	8.15e-06	0.969689	(0.93 - 1.01)	0.0754	1.01319	(0.99 - 1.04)	0.1721	1.01018	(0.99 - 1.04)	0.331	1.03433	(0.99 - 1.08)	0.116	0.95141	(0.89 - 1.01)	0.08	0.989317	(0.97 - 1.01)	0.158	rs3816470: Asthma susceptibility (Shahid et al 2015)	Inflammatory bowel disease; Asthma; Bipolar disorder; Allergic disease; Height; Type 1 diabetes;
17q21.2	17	41526235	A	G	KRT19	rs551772399	intronic	0.0211	1.152	(1.09 - 1.22)	2.08e-08	1.11351	(0.98 - 1.27)	0.0929	1.16451	(1.08 - 1.25)	1.93e-05	1.17386	(1.08 - 1.27)	4.813e-05	1.21155	(1.08 - 1.36)	0.000615	1.15424	(1.04 - 1.28)	0.00631	1.2583	(1.06 - 1.49)	0.00586	1.13983	(1.01 - 1.29)	0.0335	1.1748	(1.10 - 1.26)	1.187e-06	1.19092	(1.11 - 1.28)	6.84e-07	1.08207	(0.93 - 1.26)	0.292	0.906477	(0.73 - 1.12)	0.352	1.00086	(0.95 - 1.06)	0.974	-	Esophageal squamous cell carcinoma; Coronary artery disease; Vitiligo; Allergic disease; Multiple sclerosis; Crohn's Disease; Inflammatory Bowel Disease; Itch intensity from mosquito bite; Breast cancer; Hair shape; Type 1 diabetes;
17q21.32	17	49250821	C	T	PHOSPHO1	rs28397663	intronic	0.426	1.02386	(1.00 - 1.04)	0.00122	1.01833	(0.98 - 1.06)	0.323	1.0538	(1.03 - 1.08)	3.353e-07	1.06439	(1.04 - 1.09)	4.744e-08	1.0563	(1.02 - 1.10)	0.000724	1.05811	(1.02 - 1.09)	0.000192	1.08675	(1.03 - 1.14)	0.000593	1.04614	(1.01 - 1.09)	0.00935	1.01939	(1.00 - 1.04)	0.04468	1.0176	(0.99 - 1.04)	0.0848	1.02174	(0.97 - 1.07)	0.317	0.986492	(0.93 - 1.05)	0.634	1.00904	(0.99 - 1.03)	0.237		Coronary artery disease; Prostate cancer; Primary tooth development; Restless legs syndrome; Obesity; Serous invasive ovarian cancer; Generalized epilepsy; Alzheimer's disease
19p13.3	19	4056862	G	A	ZBTB7A	rs74178437	intronic	0.738	1.04713	(1.03 - 1.07)	2.29e-08	1.04321	(1.00 - 1.09)	0.0411	1.03365	(1.01 - 1.06)	0.004215	1.035	(1.00 - 1.07)	0.007592	1.03786	(1.00 - 1.08)	0.0425	1.0376	(1.00 - 1.08)	0.0305	1.01882	(0.96 - 1.08)	0.493	1.04158	(1.00 - 1.09)	0.0366	1.06727	(1.04 - 1.10)	1.811e-09	1.06766	(1.04 - 1.10)	1.1e-08	1.0633	(1.01 - 1.12)	0.0115	1.05772	(0.99 - 1.13)	0.0791	1.00655	(0.98 - 1.03)	0.447	-	Chronic lymphatic leukemia; Obesity-related traits; Alzheimer's disease; Interstitial lung disease; Vitiligo;
19q13.2	19	41198399	T	C	CYP2S1	rs338593	intronic	0.572	0.985654	(0.97 - 1.00)	0.0484	1.00658	(0.97 - 1.05)	0.722	0.96127	(0.94 - 0.99)	0.0001259	0.944594	(0.92 - 0.97)	6.515e-07	0.995769	(0.96 - 1.03)	0.794	0.927233	(0.90 - 0.96)	6.4e-07	0.856372	(0.81 - 0.90)	1.67e-10	0.990555	(0.95 - 1.03)	0.586	1.00823	(0.98 - 1.03)	0.3927	1.0163	(0.99 - 1.04)	0.112	0.972456	(0.93 - 1.02)	0.195	1.01001	(0.95 - 1.07)	0.727	0.990803	(0.97 - 1.01)	0.227	-	Coronary Artery Disease; Colorectal Cancer; Prostate Cancer; COPD; Smoking; Caffeine levels; Kawasaki disease
19q13.33	19	48711017	G	A	MAMSTR	rs281379	downstream	0.409	1.03034	(1.01 - 1.05)	4.66e-05	1.03003	(0.99 - 1.07)	0.109	1.04519	(1.02 - 1.07)	1.838e-05	1.05464	(1.03 - 1.08)	3.516e-06	1.01561	(0.98 - 1.05)	0.342	1.08837	(1.05 - 1.13)	2.49e-08	1.09442	(1.04 - 1.15)	0.000205	1.026	(0.99 - 1.07)	0.14	1.02061	(1.00 - 1.04)	0.03389	1.01373	(0.99 - 1.04)	0.181	1.06359	(1.01 - 1.11)	0.00428	1.05427	(0.99 - 1.12)	0.0654	1.00123	(0.98 - 1.02)	0.872	rs281379: Severe childhood asthma (Ahluwalia et al 2020)	Mumps; Inflammatory Skin disease; Childhood ear infections; Diarrheal disease at age 1; Multiple sclerosis
19q13.43	19	57910049	ACT	A	ZNF417	rs774674736	frameshift	0.00179	1.55985	(1.31 - 1.85)	1.84e-07	1.19358	(0.77 - 1.84)	0.419	1.37988	(1.08 - 1.76)	0.008677	1.37506	(1.05 - 1.80)	0.01899	1.70926	(1.16 - 2.51)	0.00597	1.25338	(0.87 - 1.79)	0.212	1.01435	(0.57 - 1.78)	0.96	1.24558	(0.81 - 1.90)	0.303	1.93653	(1.54 - 2.43)	7.3e-09	2.00774	(1.58 - 2.55)	9.62e-09	1.39019	(0.83 - 2.33)	0.208	1.00287	(0.49 - 2.05)	0.994	1.03778	(0.87 - 1.24)	0.677	-	Allergic rhinitis
21q22.13	21	38298570	A	G	KCNJ5	rs9980837	intronic	0.724	1.01803	(1.00 - 1.04)	0.0265	0.990258	(0.95 - 1.04)	0.629	1.00975	(0.98 - 1.04)	0.3898	0.995411	(0.97 - 1.03)	0.7171	1.00441	(0.96 - 1.05)	0.806	0.996078	(0.96 - 1.03)	0.814	0.977663	(0.92 - 1.04)	0.397	1.03499	(0.99 - 1.08)	0.0724	1.02912	(1.00 - 1.06)	0.006571	1.0151	(0.99 - 1.04)	0.18	1.13851	(1.08 - 1.20)	4.88e-08	1.02839	(0.96 - 1.10)	0.374	0.992746	(0.97 - 1.01)	0.386	-	Abdominal aortic aneurysm; Inflammatory Bowel Disease
22q11.2	22	20157273	G	A	CCDC188	rs78426131	regulatory	0.135	0.951039	(0.93 - 0.98)	2.59e-06	0.996715	(0.94 - 1.06)	0.903	0.971902	(0.94 - 1.01)	0.05777	0.962906	(0.93 - 1.00)	0.02381	0.963349	(0.91 - 1.01)	0.116	0.954565	(0.91 - 1.00)	0.0359	0.973595	(0.90 - 1.05)	0.449	0.981022	(0.93 - 1.04)	0.448	0.92552	(0.90 - 0.96)	3.468e-08	0.915138	(0.88 - 0.95)	2.39e-09	0.974949	(0.91 - 1.04)	0.419	0.997393	(0.91 - 1.09)	0.95	0.980473	(0.95 - 1.01)	0.0767	-	Pulse pressure
22q12.2	22	30196498	C	G	HORMAD2	rs713875	intronic	0.478	1.03946	(1.02 - 1.06)	8.24e-08	0.984472	(0.95 - 1.03)	0.389	1.01126	(0.99 - 1.04)	0.2707	1.01329	(0.99 - 1.04)	0.2448	0.990466	(0.95 - 1.03)	0.551	1.02147	(0.99 - 1.06)	0.156	1.02393	(0.97 - 1.08)	0.323	1.0014	(0.96 - 1.04)	0.935	1.08491	(1.06 - 1.11)	7.369e-18	1.09512	(1.07 - 1.12)	1.24e-19	1.03576	(0.99 - 1.08)	0.0982	1.01043	(0.95 - 1.07)	0.713	0.980503	(0.96 - 1.00)	0.00901	rs713875: IBD, Crohn's disease and Type 1 diabetes (Franke et al 2010)	Tonsillectomy; Crohn's disease; Type 1 diabetes; IBD; Monocyte count
22q13.33	22	49976339	C	G	PIM3	rs1019689682	regulatory	0.236	1.04319	(1.02 - 1.07)	8.62e-07	1.05149	(1.00 - 1.10)	0.0205	1.01847	(0.99 - 1.05)	0.1323	1.02501	(0.99 - 1.06)	0.06712	1.01424	(0.97 - 1.06)	0.461	1.03241	(0.99 - 1.07)	0.074	1.02588	(0.97 - 1.09)	0.37	1.00497	(0.96 - 1.05)	0.808	1.07724	(1.05 - 1.11)	4.117e-11	1.07518	(1.05 - 1.11)	1.29e-09	1.08101	(1.02 - 1.14)	0.00214	1.01153	(0.94 - 1.09)	0.732	1.00906	(0.99 - 1.03)	0.314	-	Ulcerative colitis; BMI
Xq26.3	X	136591724	G	A	VGLL1	rs2491199	intergenic	0.488	0.981336	(0.96 - 1.00)	0.00195	0.998741	(0.96 - 1.03)	0.936	0.996207	(0.97 - 1.02)	0.6556	0.993422	(0.97 - 1.02)	0.4931	0.982082	(0.95 - 1.01)	0.192	0.984442	(0.96 - 1.01)	0.22	1.01664	(0.97 - 1.06)	0.383	1.00577	(0.97 - 1.04)	0.668	0.955615	(0.94 - 0.98)	2.079e-08	0.956237	(0.94 - 0.98)	2.13e-07	0.958343	(0.92 - 1.00)	0.0162	1.00033	(0.95 - 1.05)	0.989	0.998981	(0.98 - 1.02)	0.872	-	-
[truncated: 2 more columns]

## Sheet: TableS5-Phenotype_lead_SNPs
Phenotype-specific lead SNPs
PHENOTYPE	LOCUS	CHR	POS	Ref	Alt	Nearest gene	rsid	Consequence	MAF	OR (95 % CI)		p
Vasomotor and allergic rhinitis	2q12.1	2	102299506	A	AT	IL1RL1	rs11406702,rs397944555	intergenic	0.16	0.871979	(0.83 - 0.92)	4.5e-10
Vasomotor and allergic rhinitis	5q22.1	5	111131801	C	T	WDR36	rs1438673	intergenic	0.553	0.89561	(0.86 - 0.93)	8.2e-12
Vasomotor and allergic rhinitis	6p21.33	6	31587880	A	G	LST1	rs3135041	non-coding	0.302	1.1015	(1.06 - 1.14)	3.4e-08
Vasomotor and allergic rhinitis	9p24.1	9	6193455	C	A	IL33	rs2381416	upstream	0.756	0.900991	(0.86 - 0.94)	2.38e-08
Vasomotor and allergic rhinitis	9q33.3	9	124307465	C	T	NEK6	rs3758213	intronic	0.382	0.910747	(0.88 - 0.95)	1.65e-08
Vasomotor and allergic rhinitis	11q13.5	11	76585239	T	C	EMSY	rs11236795	intergenic	0.738	1.11687	(1.07 - 1.16)	1.57e-09
Chronic rhinosinusitis	2q12.1	2	102380591	C	T	IL18R1	rs72823677	intronic	0.166	0.893017	(0.85 - 0.93)	2.1e-08
Chronic rhinosinusitis	5q21.3b	5	110116253	A	T	TMEM232	rs187769944	intergenic	0.0224	1.3381	(1.21 - 1.48)	1.15e-08
Chronic rhinosinusitis	5q22.1	5	111121460	C	T	WDR36	rs17624673	intronic	0.303	1.12457	(1.08 - 1.17)	5.15e-13
Chronic rhinosinusitis	6p21.32	6	32619575	C	G	HLA-DQA1	rs9271381	intergenic	0.373	1.16928	(1.13 - 1.21)	1.7e-23
Chronic rhinosinusitis	9p24.1	9	6192796	T	C	IL33	rs2095044	upstream	0.761	0.866884	(0.83 - 0.90)	4.6e-16
Chronic rhinosinusitis	17q12	17	35745536	G	A	GAS2L2,TAF15	rs3744374	missense	0.23	0.896829	(0.86 - 0.93)	9.94e-10
Chronic rhinosinusitis	19q13.33	19	48711017	G	A	MAMSTR	rs281379	downstream	0.409	1.08837	(1.05 - 1.13)	2.49e-08
Nasal polyposis	1q21.3	1	150827641	T	C	ARNT	rs2089081	intronic	0.555	0.858533	(0.81 - 0.90)	2.17e-10
Nasal polyposis	2q12.1	2	102458191	T	C	IL18RAP	rs56117144	intergenic	0.288	1.21035	(1.14 - 1.28)	6.04e-13
Nasal polyposis	2q22.3	2	145817905	G	A	ZEB2	rs66484168	intergenic	0.0878	0.787801	(0.72 - 0.86)	2.41e-08
Nasal polyposis	5q22.1	5	111133279	A	G	WDR36	rs34962275	downstream	0.313	1.2403	(1.17 - 1.31)	7.87e-17
Nasal polyposis	5q31.1a	5	131381397	C	T	CDC42SE2	rs11738827	intronic	0.273	0.855859	(0.81 - 0.91)	9.85e-09
Nasal polyposis	5q31.1b	5	132336964	T	C	SLC22A4	rs56399423	intronic	0.317	0.858173	(0.81 - 0.91)	3.14e-09
Nasal polyposis	6p21.32	6	32652772	C	A	HLA-DQA1	rs2858877	intergenic	0.192	1.4465	(1.36 - 1.54)	6.23e-32
Nasal polyposis	9p24.1	9	6192796	T	C	IL33	rs2095044	upstream	0.761	0.695545	(0.65 - 0.74)	1.99e-36
Nasal polyposis	10p14a	10	8073399	C	A	GATA3	rs10905284	intronic	0.58	0.873314	(0.83 - 0.92)	2.62e-08
Nasal polyposis	10p14b	10	9011169	C	T	GATA3	rs962993	regulatory	0.303	0.822802	(0.78 - 0.87)	1.05e-13
Nasal polyposis	12q13.2	12	55996852	A	G	RAB5B	rs705702	upstream	0.303	1.15403	(1.09 - 1.22)	3.67e-08
Nasal polyposis	16p13.13	16	11127430	A	G	CLEC16A	rs34540843	intronic	0.212	0.840608	(0.79 - 0.90)	3.37e-09
Nasal polyposis	19q13.2	19	41198399	T	C	CYP2S1	rs338593	intronic	0.572	0.856372	(0.81 - 0.90)	1.67e-10
Nasal septal deviation	2p16.1	2	55220588	C	T	CLHC1	rs548656377	intronic	0.000619	9.69286	(4.36 - 21.51)	2.33e-08
Chronic diseases of tonsils and adenoids	1p36.23	1	8189495	G	T	SLC45A1	rs12082271	upstream	0.302	0.940503	(0.92 - 0.97)	2.16e-08
Chronic diseases of tonsils and adenoids	1q41	1	221915660	G	A	DUSP10	rs12128267	intronic	0.122	1.10519	(1.07 - 1.14)	7.38e-11
Chronic diseases of tonsils and adenoids	2p13.2	2	71827707	C	T	DYSF	rs35668054	regulatory	0.0946	1.1021	(1.06 - 1.15)	1.78e-08
Chronic diseases of tonsils and adenoids	2q13	2	111429464	A	G	MIR4435-2HG	rs1045267	non-coding	0.66	0.910993	(0.89 - 0.94)	4.09e-17
Chronic diseases of tonsils and adenoids	2q33.3	2	206557414	A	G	ADAM23	rs189411872	intronic	0.0129	1.52609	(1.39 - 1.67)	2.31e-20
Chronic diseases of tonsils and adenoids	3q21.2	3	125192997	C	T	SLC12A8	rs1980080	intronic	0.653	0.941322	(0.92 - 0.97)	9.37e-09
Chronic diseases of tonsils and adenoids	4q24a	4	102593898	G	T	NFKB1	rs4648052	intronic	0.399	0.935158	(0.91 - 0.96)	5.53e-11
Chronic diseases of tonsils and adenoids	4q24b	4	105129808	G	GC	TET2	rs5860793	intergenic	0.716	1.07965	(1.05 - 1.11)	6.79e-12
Chronic diseases of tonsils and adenoids	6p21.33	6	30991224	C	T	MUC21	rs13211972	downstream	0.0452	1.18146	(1.12 - 1.24)	4.55e-12
Chronic diseases of tonsils and adenoids	8p11.21	8	42424332	G	C	SLC20A2	rs73631760	intronic	0.0939	1.10943	(1.07 - 1.15)	1.61e-09
Chronic diseases of tonsils and adenoids	9q34.2	9	133261662	G	A	ABO	rs950529388	intronic	0.564	0.93747	(0.91 - 0.96)	1.58e-10
Chronic diseases of tonsils and adenoids	12p13.31a	12	6384185	A	G	LTBR	rs10849448	5 prime UTR	0.755	0.899281	(0.87 - 0.93)	2.05e-19
Chronic diseases of tonsils and adenoids	14q32.33	14	104740994	G	A	ADSSL1	rs551502318	intronic	0.0016	2.10809	(1.61 - 2.75)	3.37e-08
Chronic diseases of tonsils and adenoids	16p11.2	16	30495944	T	G	ITGAL	rs6565189	intronic	0.71	0.941218	(0.92 - 0.97)	4.48e-08
Chronic diseases of tonsils and adenoids	16q22.1	16	67646903	G	A	CARMIL2	rs117556162	missense	0.0467	0.875561	(0.83 - 0.92)	2.92e-08
Chronic diseases of tonsils and adenoids	17p11.2	17	16939881	C	G	TNFRSF13B	rs573841223	non-coding	0.0247	1.42661	(1.33 - 1.53)	2.37e-26
Chronic diseases of tonsils and adenoids	19p13.3	19	4056862	G	A	ZBTB7A	rs74178437	intronic	0.737	1.06766	(1.04 - 1.10)	1.1e-08
Chronic diseases of tonsils and adenoids	19q13.43	19	57910049	ACT	A	ZNF417	rs774674736	frameshift	0.00176	2.00774	(1.58 - 2.55)	9.62e-09
Chronic diseases of tonsils and adenoids	22q11.21	22	20157273	G	A	CCDC188	rs78426131	regulatory	0.136	0.915138	(0.88 - 0.95)	2.39e-09
Chronic diseases of tonsils and adenoids	22q12.2	22	30196498	C	G	HORMAD2	rs713875	intronic	0.479	1.09512	(1.07 - 1.12)	1.24e-19
Chronic diseases of tonsils and adenoids	22q13.33	22	49976339	C	G	PIM3	rs1019689682	regulatory	0.236	1.07518	(1.05 - 1.11)	1.29e-09
Peritonsillar abscess	3q12.3	3	101940101	G	A	NFKBIZ	rs1456200	upstream	0.375	1.13475	(1.08 - 1.19)	9.36e-09
Peritonsillar abscess	3q21.2	3	125197035	G	A	SLC12A8	rs816340	intronic	0.27	1.1687	(1.11 - 1.23)	9.1e-11
Peritonsillar abscess	12p13.31a	12	6390939	T	G	LTBR	rs12354	3 prime UTR	0.75	0.859435	(0.81 - 0.91)	7.7e-10
Peritonsillar abscess	13q21.33	13	69997382	T	C	KLHL1	rs3003202	intronic	0.669	0.841213	(0.80 - 0.88)	1.9e-14
Peritonsillar abscess	21q22.13	21	38298570	A	G	KCNJ5	rs9980837	intronic	0.724	1.13851	(1.08 - 1.20)	4.9e-08
Diseases of pulp and periapical tissues	16q21	16	59708933	G	A	RP11-457D20.2	rs747852970	downstream	0.000812	2.21429	(1.69 - 2.90)	5.22e-09
Diseases of pulp and periapical tissues	22q12.2	22	30186009	G	C	HORMAD2	rs9614155	intronic	0.163	0.938784	(0.92 - 0.96)	6.51e-10
Chronic periodontitis	16q22.3	16	73142018	C	T	ZFHX3	rs80193913	intronic	0.0758	1.15	(1.09 - 1.21)	8.71e-09

## Sheet: TableS6-Replication_in_PanUK
Replication analysis of four endpoints in the PanUK database								FinnGen				PanUK
PHENOTYPE	LOCUS	CHR	POS	Ref	Alt	Nearest gene	rsid	Eff sample size	Beta	SE	p-value	Eff sample size	Beta	SE	p-value	z	pval	Codirectional?	Statistical power***
Vasomotor and allergic rhinitis	2q12.1	2	102299506	A	AT	IL1RL1	rs11406702,rs397944555	8588	-0.137	0.022	4.5e-10	1525	-0.0965	0.0527	0.0669	0.502945	0.478209	TRUE	0.744498
Vasomotor and allergic rhinitis	5q22.1	5	111131801	C	T	WDR36	rs1438673	8588	-0.11	0.0161	8.2e-12	1525	-0.117	0.0364	0.00123	0.030931	0.860394	TRUE	0.859045
Vasomotor and allergic rhinitis	9p24.1	9	6193455	C	A	IL33	rs2381416	8588	-0.104	0.0187	2.38e-08	1525	-0.0341	0.0412	0.407857	2.38676	0.122367	TRUE	0.715716
Vasomotor and allergic rhinitis	9q33.3	9	124307465	C	T	NEK6	rs3758213	8588	-0.0935	0.0166	1.65e-08	1525	-0.0144	0.0369	0.696356	3.82172	0.0505922	TRUE	0.721702
Vasomotor and allergic rhinitis	11q13.5	11	76585239	T	C	EMSY	rs11236795	8588	0.111	0.0183	1.57e-09	1525	0.0878	0.0451	0.0515605	0.227211	0.6336	TRUE	0.7008
Chronic rhinosinusitis	2q12.1	2	102380591	C	T	IL18R1	rs72823677	9916	-0.113	0.0202	2.1e-08	3003	-0.0994	0.0375	0.00808	0.101946	0.749506	TRUE	0.858066
Chronic rhinosinusitis	*5q21.3b	5	110009806	C	T	MAN2A1	rs138556674	9916	0.242	0.04873	5.6e-07	3003	-0.121	0.196	0.536	3.23038	0.0722841	FALSE	0.248667
Chronic rhinosinusitis	5q22.1	5	111121460	C	T	WDR36	rs17624673	9916	0.117	0.0163	5.15e-13	3003	0.0108	0.0272	0.692	11.2164	0.00081077	TRUE	0.991144
Chronic rhinosinusitis	9p24.1	9	6192796	T	C	IL33	rs2095044	9916	-0.143	0.0176	4.61e-16	3003	-0.128	0.0298	1.66e-05	0.187844	0.664717	TRUE	0.998025
Chronic rhinosinusitis	17q12	17	35745536	G	A	GAS2L2,TAF15	rs3744374	9916	-0.109	0.0178	9.94e-10	3003	0.0119	0.0306	0.699	11.6636	0.000637353	FALSE	0.947701
Chronic rhinosinusitis	19q13.33	19	48711017	G	A	MAMSTR	rs281379	9916	0.0847	0.0152	2.49e-08	3003	0.0355	0.0261	0.174	2.65348	0.103323	TRUE	0.906309
Nasal polyposis	1q21.3	1	150827641	T	C	ARNT	rs2089081	3843	-0.153	0.024	2.17e-10	3632	-0.0757	0.024	0.0016	5.18688	0.022758	TRUE	0.999997
Nasal polyposis	2q12.1	2	102458191	T	C	IL18RAP	rs56117144	3843	0.191	0.0265	6.04e-13	3632	0.149	0.0262	1.34e-08	1.27026	0.259718	TRUE	1
Nasal polyposis	2q22.3	2	145817905	G	A	ZEB2	rs66484168	3843	-0.239	0.0428	2.41e-08	3632	-0.13	0.042	0.00201	3.3041	0.0691074	TRUE	0.999941
Nasal polyposis	5q22.1	5	111133279	A	G	WDR36	rs34962275	3843	0.215	0.0258	7.87e-17	3632	0.176	0.0249	1.36e-12	1.18306	0.276734	TRUE	1
Nasal polyposis	5q31.1a	5	131381397	C	T	CDC42SE2	rs11738827	3843	-0.156	0.0272	9.85e-09	3632	-0.127	0.0249	3.67e-07	0.618451	0.431624	TRUE	0.999997
Nasal polyposis	5q31.1b	5	132336964	T	C	SLC22A4	rs56399423	3843	-0.153	0.0258	3.14e-09	3632	-0.15	0.0241	4.71e-10	0.00722051	0.932282	TRUE	0.999997
Nasal polyposis	9p24.1	9	6192796	T	C	IL33	rs2095044	3843	-0.363	0.0288	1.99e-36	3632	-0.29	0.028	2.93e-25	3.30288	0.0691585	TRUE	1
Nasal polyposis	10p14a	10	8073399	C	A	GATA3	rs10905284	3843	-0.135	0.0243	2.62e-08	3632	-0.119	0.0243	1.07e-06	0.216769	0.641513	TRUE	0.999903
Nasal polyposis	10p14b	10	9011169	C	T	GATA3	rs962993	3843	-0.195	0.0262	1.05e-13	3632	-0.179	0.0242	1.36e-13	0.201245	0.653718	TRUE	1
Nasal polyposis	12q13.2	12	55996852	A	G	RAB5B	rs705702	3843	0.143	0.026	3.67e-08	3632	0.142	0.0253	2.07e-08	0.000759826	0.978009	TRUE	0.999928
Nasal polyposis	16p13.13	16	11127430	A	G	CLEC16A	rs34540843	3843	-0.174	0.0294	3.37e-09	3632	-0.127	0.0278	4.59e-06	1.34925	0.245408	TRUE	0.999996
Nasal polyposis	19q13.2	19	41198399	T	C	CYP2S1	rs338593	3843	-0.155	0.0243	1.67e-10	3632	-0.155	0.0242	1.68e-10	0	1	TRUE	0.999998
Chronic diseases of tonsils and adenoids	1p36.23	1	8189495	G	T	SLC45A1	rs12082271	25418	-0.0613	0.011	2.16e-08	1247	-0.0692	0.0424	0.103	0.0325262	0.856878	TRUE	0.309924
Chronic diseases of tonsils and adenoids	1q41	1	221915660	G	A	DUSP10	rs12128267	25418	-0.1	0.0154	7.38e-11	1247	0.0354	0.0728	0.627	3.31103	0.0688164	FALSE	0.287354
Chronic diseases of tonsils and adenoids	2p13.2	2	71827707	C	T	DYSF	rs35668054	25418	0.0972	0.0173	1.78e-08	1247	0.0739	0.0777	0.342	0.0856756	0.769749	TRUE	0.252182
Chronic diseases of tonsils and adenoids	2q13	2	111429464	A	G	MIR4435-2HG	rs1045267	25418	-0.0932	0.0111	4.09e-17	1247	-0.0114	0.0496	0.818	2.59012	0.107532	TRUE	0.538855
Chronic diseases of tonsils and adenoids	*2q33.3	2	206720410	G	C	DYTN	rs4675628	25418	0.107	0.0187	9.85e-09	1247	0.0386	0.0977	0.693	0.472822	0.491692	TRUE	0.194585
Chronic diseases of tonsils and adenoids	3q21.2	3	125192997	C	T	SLC12A8	rs1980080	25418	-0.0605	0.0105	9.37e-09	1247	0.00889	0.0431	0.837	2.44681	0.117764	FALSE	0.291595
Chronic diseases of tonsils and adenoids	4q24a	4	102593898	G	T	NFKB1	rs4648052	25418	-0.067	0.0102	5.53e-11	1247	-0.0534	0.0415	0.198	0.101276	0.750303	TRUE	0.366584
Chronic diseases of tonsils and adenoids	4q24b	4	105129808	G	GC	TET2	rs5860793	25418	0.0766	0.0112	6.79e-12	1247	0.044	0.0424	0.3	0.5526	0.457257	TRUE	0.44476
Chronic diseases of tonsils and adenoids	8p11.21	8	42424332	G	C	SLC20A2	rs73631760	25418	0.104	0.0172	1.61e-09	1247	-0.0261	0.0942	0.782	1.84591	0.17426	FALSE	0.198899
Chronic diseases of tonsils and adenoids	*9q34.2	9	133268030	G	A	ABO	rs994718904	25418	-0.0635	0.0101	3.15e-10	1247	-0.0908	0.0433	0.0361	0.376999	0.539214	TRUE	0.314918
Chronic diseases of tonsils and adenoids	12p13.31a	12	6384185	A	G	LTBR	rs10849448	25418	-0.106	0.0118	2.05e-19	1247	-0.0341	0.0474	0.472	2.16664	0.141034	TRUE	0.626492
Chronic diseases of tonsils and adenoids	**14q32.33	14	104740994	G	A	ADSSL1	rs551502318	25418	0.746	0.135	3.37e-08	1247	#N/A	#N/A	#N/A	#N/A	#N/A	#N/A	0.291725
Chronic diseases of tonsils and adenoids	16p11.2	16	30495944	T	G	ITGAL	rs6565189	25418	-0.0606	0.0111	4.48e-08	1247	-0.0342	0.0431	0.427	0.351854	0.553065	TRUE	0.35078
Chronic diseases of tonsils and adenoids	16q22.1	16	67646903	G	A	CARMIL2	rs117556162	25418	-0.133	0.024	2.92e-08	1247	-0.0742	0.0843	0.379	0.450042	0.502315	TRUE	0.296298
Chronic diseases of tonsils and adenoids	*17p11.2	17	17145060	T	A	MPRIP	rs113120049	25418	0.216	0.0266	4.11e-16	1247	0.169	0.163	0.3	0.0809853	0.775967	TRUE	0.322271
Chronic diseases of tonsils and adenoids	19p13.3	19	4056862	G	A	ZBTB7A	rs74178437	25418	0.0655	0.0115	1.1e-08	1247	0.0487	0.0442	0.27	0.135309	0.71299	TRUE	0.383036
Chronic diseases of tonsils and adenoids	**19q13.43	19	57910049	ACT	A	ZNF417	rs774674736	25418	0.697	0.121	9.62e-09	1247	#N/A	#N/A	#N/A	#N/A	#N/A	#N/A	0.616075
Chronic diseases of tonsils and adenoids	22q11.21	22	20157273	G	A	CCDC188	rs78426131	25418	-0.0887	0.0149	2.39e-09	1247	0.0149	0.0543	0.783	3.38526	0.0657819	FALSE	0.364242
Chronic diseases of tonsils and adenoids	22q12.2	22	30196498	C	G	HORMAD2	rs713875	25418	0.0909	0.01	1.24e-19	1247	0.0949	0.0403	0.0187	0.00928026	0.923255	TRUE	0.524589
Chronic diseases of tonsils and adenoids	22q13.33	22	49970241	G	A	PIM3	rs73181194	25418	0.0725	0.012	1.5e-09	1247	0.0235	0.048	0.625	0.980801	0.322001	TRUE	0.364242
*Lead SNPs in FG analysis not included in UKB panel were changed to another GWS SNP in the same locus
**Loci with no GWS SNPs tagged in both FinnGen and PanUK analysis
***Probability of null hypothesis rejection in the PanUK replication analysis, given that the true effect is that observed in FinnGen (alpha = 0.05)

## Sheet: TableS7-PheWAS_results
Phenome-wide association of lead SNPs in FinnGen PheWEB (R6), IURD endpoints not included
Locus	SNP	Disease endpoint	P-value	Beta
1p36.23	rs12082271	Other and unspecified tonsillitis	7.18e-06	-0.08018
1p36.23	rs12082271	Other functional intestinal disorders	9.95e-06	0.07486
1q21.3	rs2089081	Other malignant neoplasms of skin (=non-melanoma skin cancer) (controls excluding all cancers)	1.97e-07	0.07395
1q21.3	rs2089081	Malignant neoplasm of skin (controls excluding all cancers)	2.27e-07	0.07342
1q21.3	rs2089081	Other diseases of upper respiratory tract	3.11e-07	-0.0371
1q21.3	rs2089081	Other malignant neoplasms of skin (=non-melanoma skin cancer)	3.18e-07	0.07066
1q21.3	rs2089081	Malignant neoplasm of skin	3.48e-07	0.07043
1q21.3	rs2089081	Noninfective enteritis and colitis	1.29e-06	0.07118
2p13.2	rs35668054	Asthma, including primary care data	1.26e-07	-0.08641
2p13.2	rs35668054	Suggestive for eosinophilic asthma	9.68e-07	-0.32848
2p13.2	rs35668054	Asthma (mode)	3.89e-06	-0.0872
2p13.2	rs35668054	Asthma (more control exclusions)	1.12e-05	-0.08126
2p13.2	rs35668054	Asthma	1.23e-05	-0.08076
2q12.1	rs950881	Asthma, including avohilmo	1.9e-16	-0.10598
2q12.1	rs950881	Asthma/COPD (KELA code 203)	3.11e-16	-0.11894
2q12.1	rs950881	Asthma	7.61e-16	-0.11699
2q12.1	rs950881	Asthma (only as main-diagnosis)	1.37e-15	-0.12402
2q12.1	rs950881	Asthma (more control exclusions)	3.38e-15	-0.11463
2q12.1	rs950881	Asthma (mode)	4.08e-15	-0.1165
2q12.1	rs950881	Asthma (only as main-diagnosis) (more control exclusions)	5.18e-15	-0.12151
2q12.1	rs950881	Asthma, hospital admissions , main diagnosis only	4.78e-14	-0.1129
2q12.1	rs950881	Chronic lower respiratory diseases	5.13e-14	-0.08857
2q12.1	rs950881	Childhood asthma (age<16) (more control exclusions)	2.52e-12	-0.25381
2q12.1	rs950881	Childhood asthma (age<16)	2.64e-12	-0.25298
2q12.1	rs950881	Use of eye-antiallergens (taken as indicator of allergic/atopic conjunctivitis)	8.15e-12	-0.12839
2q12.1	rs950881	Allergic conjunctivitis	9.79e-12	-0.12531
2q12.1	rs950881	Asthma-related infections	3.01e-10	-0.1209
2q12.1	rs950881	Conjunctivitis	4.62e-10	-0.098
2q12.1	rs950881	Asthma-related acute respiratory infections	2.09e-09	-0.1316
2q12.1	rs950881	Disorders of conjunctiva	1.05e-07	-0.07929
2q12.1	rs950881	Allergic asthma (mode)	1.17e-06	-0.13029
2q12.1	rs950881	Atopic dermatitis	1.19e-06	-0.11041
2q12.1	rs950881	Allergic asthma (mode) (more control exclusions)	1.57e-06	-0.12884
2q12.1	rs950881	Asthma and allergy	2.38e-06	-0.18163
2q12.1	rs950881	Asthma and allergy (more control exclusions)	2.73e-06	-0.18081
2q12.1	rs950881	Atopic dermatitis, strict definition	2.85e-06	-0.12067
2q12.1	rs950881	Atopic dermatitis, strict definition with reimbursement	4.23e-06	-0.11593
2q12.1	rs950881	Acute upper respiratory infections	1.45e-05	-0.04691
2q13	rs1045267	Other and unspecified tonssillitis	1.34e-05	-0.07872
2q22.3	rs16825450	Coronary angioplasty	5.51e-06	0.12838
5p13.2	rs11406102	First line medication for Crohns disease (including steroids)	6.88e-09	-0.04777
5p13.2	rs11406102	Asthma (mode)	9.05e-07	-0.05692
5p13.2	rs11406102	Benign neoplasm of colon, rectum, anus and anal canal (controls excluding all cancers)	9.67e-07	0.07553
5p13.2	rs11406102	Chronic lower respiratory diseases	1.1e-06	-0.04486
5p13.2	rs11406102	Asthma (more control exclusions)	1.42e-06	-0.0548
5p13.2	rs11406102	Asthma	1.6e-06	-0.05441
5p13.2	rs11406102	Dermatitis and eczema	1.95e-06	-0.05106
5p13.2	rs11406102	Asthma, including avohilmo	2.23e-06	-0.04763
5p13.2	rs11406102	Interstitial lung disease endpoints	2.6e-06	-0.04866
5p13.2	rs11406102	Autoimmune diseases	3.14e-06	-0.04054
5p13.2	rs11406102	Allergic asthma (mode) (more control exclusions)	4.7e-06	-0.0965
5p13.2	rs11406102	Allergic asthma (mode)	5.02e-06	-0.09614
5p13.2	rs11406102	Asthma/COPD (KELA code 203)	5.99e-06	-0.05147
5p13.2	rs11406102	Malignant neoplasm	1.27e-05	0.03652
5q22.1	rs1837253	Asthma (mode)	2.96e-23	0.12821
5q22.1	rs1837253	Asthma	7.11e-23	0.12426
5q22.1	rs1837253	Asthma, including avohilmo	1.03e-22	0.10983
5q22.1	rs1837253	Asthma (more control exclusions)	1.27e-22	0.12379
5q22.1	rs1837253	Chronic lower respiratory diseases	1.27e-20	0.09515
5q22.1	rs1837253	Asthma (only as main-diagnosis)	1.86e-20	0.12508
5q22.1	rs1837253	Asthma (only as main-diagnosis) (more control exclusions)	2.97e-20	0.12441
5q22.1	rs1837253	Asthma, hospital admissions , main diagnosis only	9.94e-20	0.11844
5q22.1	rs1837253	Asthma/COPD (KELA code 203)	1.62e-19	0.11425
5q22.1	rs1837253	Suggestive for eosinophilic asthma	8.61e-14	0.34287
5q22.1	rs1837253	Asthma-related infections	1.16e-11	0.11313
5q22.1	rs1837253	Childhood asthma (age<16)	1.36e-10	0.19996
5q22.1	rs1837253	Childhood asthma (age<16) (more control exclusions)	1.48e-10	0.19998
5q22.1	rs1837253	Asthma-related acute respiratory infections	2.4e-10	0.12089
5q22.1	rs1837253	Asthma, unspecified (mode)	6.66e-10	0.10459
5q22.1	rs1837253	Asthma, unspecified (mode) (more control exclusions)	6.9e-10	0.105
5q22.1	rs1837253	Allergic asthma (mode)	1.41e-08	0.13276
5q22.1	rs1837253	Allergic asthma (mode) (more control exclusions)	1.65e-08	0.1322
5q22.1	rs1837253	Asthma and allergy	3.7e-06	0.15514
5q22.1	rs1837253	Asthma and allergy (more control exclusions)	3.79e-06	0.15514
5q22.1	rs1837253	Non-allergic asthma (mode)	4.73e-06	0.11879
5q22.1	rs1837253	Non-allergic asthma (mode) (more control exclusions)	5e-06	0.11861
5q22.1	rs1837253	Asthma-related pneumonia or sepsis	1.37e-05	0.09356
5q22.1	rs1837253	Asthma-related pneumonia	1.49e-05	0.09333
5q31.1a	rs11738827	Asthma, including avohilmo	1.23e-09	-0.06491
5q31.1a	rs11738827	Suggestive for eosinophilic asthma	2.66e-09	-0.25961
5q31.1a	rs11738827	Chronic lower respiratory diseases	3.37e-09	-0.05768
5q31.1a	rs11738827	Dermatitis and eczema	4.33e-09	-0.06671
5q31.1a	rs11738827	Asthma/COPD (KELA code 203)	4.43e-09	-0.07083
5q31.1a	rs11738827	Asthma (mode)	5.04e-09	-0.07204
5q31.1a	rs11738827	Asthma (more control exclusions)	6.24e-09	-0.07019
5q31.1a	rs11738827	Asthma	7.14e-09	-0.06976
5q31.1a	rs11738827	Asthma, hospital admissions , main diagnosis only	2.33e-08	-0.06939
5q31.1a	rs11738827	Asthma (only as main-diagnosis) (more control exclusions)	3.66e-08	-0.071
5q31.1a	rs11738827	Asthma (only as main-diagnosis)	4.15e-08	-0.07072
5q31.1a	rs11738827	Other and unspecified dermatitis	1.4e-07	-0.07961
5q31.1a	rs11738827	Chalazion	1.69e-07	0.18365
5q31.1a	rs11738827	Asthma-related infections	1.74e-07	-0.08338
5q31.1a	rs11738827	Atopic dermatitis, strict definition with reimbursement	9.12e-07	-0.10239
5q31.1a	rs11738827	Asthma-related acute respiratory infections	9.85e-07	-0.08926
5q31.1a	rs11738827	Asthma, unspecified (mode) (more control exclusions)	1.38e-06	-0.07865
5q31.1a	rs11738827	Atopic dermatitis	1.51e-06	-0.09038
5q31.1a	rs11738827	Asthma, unspecified (mode)	1.66e-06	-0.0777
5q31.1a	rs11738827	Atopic dermatitis, strict definition	3.92e-06	-0.09849
5q31.1a	rs11738827	Crohn disease (strict definition, all UC cases excluded)	7.24e-06	0.25336
5q31.1a	rs11738827	Infective dermatitis	7.41e-06	-0.15998
5q31.1b	rs56399423	Asthma, including avohilmo	7.03e-19	-0.09047
5q31.1b	rs56399423	Chronic lower respiratory diseases	1.61e-18	-0.08178
5q31.1b	rs56399423	Asthma/COPD (KELA code 203)	3.84e-18	-0.10001
5q31.1b	rs56399423	Asthma (more control exclusions)	6.56e-18	-0.09936
5q31.1b	rs56399423	Asthma (mode)	1.02e-17	-0.10079
5q31.1b	rs56399423	Asthma	1.08e-17	-0.0985
5q31.1b	rs56399423	Asthma, hospital admissions , main diagnosis only	2.35e-17	-0.10051
5q31.1b	rs56399423	Asthma (only as main-diagnosis) (more control exclusions)	5.42e-17	-0.10308
5q31.1b	rs56399423	Asthma (only as main-diagnosis)	7.75e-17	-0.10258
5q31.1b	rs56399423	Suggestive for eosinophilic asthma	2.62e-11	-0.27571
5q31.1b	rs56399423	Asthma, unspecified (mode) (more control exclusions)	2.44e-10	-0.09827
5q31.1b	rs56399423	Asthma, unspecified (mode)	4.93e-10	-0.09616
5q31.1b	rs56399423	Asthma-related infections	1.28e-09	-0.09242
5q31.1b	rs56399423	Dermatitis and eczema	8.41e-09	-0.0625
5q31.1b	rs56399423	Allergic asthma (mode)	1.67e-08	-0.12054
5q31.1b	rs56399423	Allergic asthma (mode) (more control exclusions)	1.78e-08	-0.12033
5q31.1b	rs56399423	Chalazion	1.97e-08	0.18797
5q31.1b	rs56399423	Other and unspecified dermatitis	1.59e-07	-0.07559
5q31.1b	rs56399423	Asthma-related acute respiratory infections	1.62e-07	-0.09119
5q31.1b	rs56399423	Inflammatory bowel disease	1.68e-07	0.09995
5q31.1b	rs56399423	Diseases of veins, lymphatic vessels and lymph nodes, not elsewhere classified	2.83e-07	-0.05285
5q31.1b	rs56399423	Malignant neoplasm of breast, HER-positive	8.88e-07	0.10093
5q31.1b	rs56399423	Malignant neoplasm of breast, HER-positive (controls excluding all cancers)	1.1e-06	0.10206
5q31.1b	rs56399423	Noninfective enteritis and colitis	1.15e-06	0.0764
5q31.1b	rs56399423	Atopic dermatitis	1.64e-06	-0.08615
5q31.1b	rs56399423	Atopic dermatitis, strict definition with reimbursement	2.22e-06	-0.09434
5q31.1b	rs56399423	IBD patients in KELA-register	2.67e-06	0.10737
5q31.1b	rs56399423	Other and unspecified dermatitis	5.07e-06	-0.07222
5q31.1b	rs56399423	Atopic dermatitis, strict definition	6.21e-06	-0.09222
5q31.1b	rs56399423	Interstitial lung disease endpoints	7.04e-06	0.04687
5q31.1b	rs56399423	Varicose veins	8.34e-06	-0.05943
8p11.21	rs73631760	Articial joint operation, menisceal resection	1.35e-05	0.07836
9p24.1	rs2095044	Chronic lower respiratory diseases	1.56e-18	-0.08883
9p24.1	rs2095044	Asthma/COPD (KELA code 203)	1.59e-16	-0.10296
9p24.1	rs2095044	Asthma	2.09e-16	-0.10237
9p24.1	rs2095044	Asthma (more control exclusions)	2.52e-16	-0.10229
9p24.1	rs2095044	Asthma (mode)	3.39e-16	-0.10387
9p24.1	rs2095044	Asthma (only as main-diagnosis)	2.88e-15	-0.10524
9p24.1	rs2095044	Asthma (only as main-diagnosis) (more control exclusions)	3.69e-15	-0.10481
9p24.1	rs2095044	Asthma-related infections	2.9e-14	-0.12592
9p24.1	rs2095044	Asthma, including avohilmo	4.68e-14	-0.08329
9p24.1	rs2095044	Asthma, hospital admissions , main diagnosis only	1.95e-13	-0.09442
9p24.1	rs2095044	Asthma-related acute respiratory infections	3.25e-13	-0.13819
9p24.1	rs2095044	Suggestive for eosinophilic asthma	6.69e-12	-0.31147
9p24.1	rs2095044	Asthma-related pneumonia or sepsis	1.2e-08	-0.12237
9p24.1	rs2095044	Allergic asthma (mode)	1.29e-08	-0.13173
9p24.1	rs2095044	Allergic asthma (mode) (more control exclusions)	1.41e-08	-0.13143
9p24.1	rs2095044	Asthma-related pneumonia	1.42e-08	-0.12193
9p24.1	rs2095044	Childhood asthma (age<16) (more control exclusions)	2.54e-08	-0.17174
9p24.1	rs2095044	Childhood asthma (age<16)	2.71e-08	-0.17102
9p24.1	rs2095044	Acute sinusitis	4.36e-07	-0.07777
9p24.1	rs2095044	Asthma and allergy	1.71e-06	-0.1593
9p24.1	rs2095044	Asthma and allergy (more control exclusions)	1.72e-06	-0.15938
9p24.1	rs2095044	Asthma, unspecified (mode) (more control exclusions)	3.15e-06	-0.07884
9p24.1	rs2095044	Asthma, unspecified (mode)	3.54e-06	-0.07808
9q33.3	rs3758213	Hypothyroidism, strict autoimmune, 3 medication purchases required	1.07e-08	-0.05827
9q33.3	rs3758213	Autoimmune diseases	1.5e-08	-0.0477
9q33.3	rs3758213	Hypothyroidism, strict autoimmune	1.67e-08	-0.06159
9q33.3	rs3758213	Hypothyroidism, other/unspecified	1.7e-08	-0.05735
9q33.3	rs3758213	Disorders of the thyroid gland	9.86e-08	-0.05014
9q33.3	rs3758213	Diseases of the musculoskeletal system and connective tissue	8.88e-07	-0.0329
9q33.3	rs3758213	Arthropathies	3.62e-06	-0.03241
9q33.3	rs3758213	Endocrine, nutritional and metabolic diseases	4.76e-06	-0.03226
9q33.3	rs3758213	Asthma and allergy	1.51e-05	-0.1269
9q33.3	rs3758213	Asthma and allergy (more control exclusions)	1.51e-05	-0.12702
9q33.3	rs3758213	Polyarthropathies	1.55e-05	-0.05195
9q34.2	rs950529388	Venous thromboembolism	3.38e-64	-0.24742
9q34.2	rs950529388	DVT of lower extremities and pulmonary embolism	1.83e-57	-0.24986
9q34.2	rs950529388	DVT of lower extremities	2e-55	-0.31911
9q34.2	rs950529388	Phlebitis and thrombophlebitis (not including DVT)	5.17e-33	-0.2785
9q34.2	rs950529388	Diseases of veins, lymphatic vessels and lymph nodes, not elsewhere classified	1.07e-29	-0.10893
9q34.2	rs950529388	Diseases of veins, lymphatic vessels and lymph nodes, not elsewhere classified (FINNGEN)	2.75e-27	-0.12438
9q34.2	rs950529388	Pulmonary embolism	1.57e-23	-0.20928
9q34.2	rs950529388	Pulmonary heart disease	1.83e-23	-0.20886
9q34.2	rs950529388	Pulmonary heart disease, diseases of pulmonary circulation	7.54e-22	-0.19151
9q34.2	rs950529388	Other embolism and thrombosis	1.34e-21	-0.28958
9q34.2	rs950529388	Disorders of gallbladder, biliary tract and pancreas	2.1e-10	-0.06304
9q34.2	rs950529388	Duodenal ulcer	1.65e-09	0.18987
9q34.2	rs950529388	Cholelithiasis, broad definition with cholecystitis	8.91e-09	-0.06274
9q34.2	rs950529388	Cholelithiasis	1.37e-08	-0.06296
9q34.2	rs950529388	Other disorders of veins	3.28e-08	-0.10027
9q34.2	rs950529388	Second line medication for Crohns disease	9.63e-08	-0.07089
9q34.2	rs950529388	Statin medication	1.16e-07	-0.04388
9q34.2	rs950529388	Type 2 diabetes	2.83e-07	-0.04897
9q34.2	rs950529388	Varicose veins	3.65e-07	-0.06338
9q34.2	rs950529388	Type 2 diabetes, strict (exclude DM1)	5.07e-07	-0.05031
9q34.2	rs950529388	Type 2 diabetes with other specified/multiple/unspecified complications	5.3e-07	-0.05423
9q34.2	rs950529388	Type 2 diabetes, wide definition	5.5e-07	-0.05994
9q34.2	rs950529388	Diabetes, insuline treatment (Kela reimbursement) (more control exclusions)	5.57e-07	-0.04993
9q34.2	rs950529388	Type 2 diabetes, definitions combined	5.93e-07	-0.04998
9q34.2	rs950529388	Diabetes mellitus	6.43e-07	-0.04536
9q34.2	rs950529388	Gastroduodenal ulcer	6.61e-07	0.09838
9q34.2	rs950529388	Diabetes, insuline treatment (Kela reimbursement)	7.59e-07	-0.04859
9q34.2	rs950529388	Diabetes, varying definitions	1.19e-06	-0.04393
9q34.2	rs950529388	Other diabetes, wide definition	1.25e-06	-0.04615
9q34.2	rs950529388	Type 2 diabetes without complications	2.24e-06	-0.06015
9q34.2	rs950529388	Type 2 diabetes, definitions combined, including avohilmo	3.54e-06	-0.04606
9q34.2	rs950529388	Disorders of lipoprotein metabolism and other lipidaemias	4.17e-06	-0.05303
9q34.2	rs950529388	Cardiovascular diseases (excluding rheumatic etc)	4.76e-06	-0.03342
9q34.2	rs950529388	Endocrine, nutritional and metabolic diseases	5.82e-06	-0.03123
9q34.2	rs950529388	Haemmorrhoids and perianal venous thrombosis	6.8e-06	0.10149
9q34.2	rs950529388	Pure hypercholesterolaemia	7.35e-06	-0.06163
9q34.2	rs950529388	Diverticular disease of intestine	7.98e-06	0.05586
9q34.2	rs950529388	Certain infectious and parasitic diseases	8.07e-06	-0.02937
9q34.2	rs950529388	Thyrotoxicosis	1.48e-05	0.09118
9q34.2	rs950529388	Nontoxic multinodular goitre	1.49e-05	0.10323
9q34.2	rs950529388	Coxarthrosis, primary, with hip surgery	1.54e-05	0.0735
10p14a	rs10905284	Asthma/COPD (KELA code 203)	8.86e-09	-0.06254
10p14a	rs10905284	Chronic lower respiratory diseases	6.34e-08	-0.0476
10p14a	rs10905284	Asthma, including primary care data	1.02e-05	-0.04246
10p14a	rs10905284	IBD (strict) with PSC	1.15e-05	-0.47856
10p14b	rs1663680	Asthma/COPD (KELA code 203)	2.91e-17	-0.09879
10p14b	rs1663680	Chronic lower respiratory diseases	1.29e-13	-0.06994
10p14b	rs1663680	Asthma (mode)	2.66e-11	-0.07935
10p14b	rs1663680	Asthma (only as main-diagnosis)	4.17e-11	-0.08218
10p14b	rs1663680	Asthma, including avohilmo	4.39e-11	-0.0681
10p14b	rs1663680	Asthma (only as main-diagnosis) (more control exclusions)	4.43e-11	-0.08208
10p14b	rs1663680	Asthma	9.03e-11	-0.07549
10p14b	rs1663680	Asthma (more control exclusions)	9.65e-11	-0.07555
10p14b	rs1663680	Asthma, hospital admissions , main diagnosis only	2.02e-10	-0.07642
10p14b	rs1663680	Suggestive for eosinophilic asthma	3.69e-09	-0.24666
10p14b	rs1663680	Asthma-related infections	3.18e-07	-0.07884
10p14b	rs1663680	First line medication for Crohns disease (including steroids)	2.3e-06	-0.03983
11q13.5	rs10160518	Atopic dermatitis	1.27e-19	0.15227
11q13.5	rs10160518	Atopic dermatitis, strict definition with reimbursement	1.72e-18	0.16358
11q13.5	rs10160518	Atopic dermatitis, strict definition	1.92e-18	0.16716
11q13.5	rs10160518	Dermatitis and eczema	2.41e-11	0.06777
11q13.5	rs10160518	Inflammatory bowel disease, strict (require KELA)	3.96e-11	0.147
11q13.5	rs10160518	IBD patients in KELA-register	1.26e-09	0.1303
11q13.5	rs10160518	Ulcerative colitis (strict definition, require KELA)	1.39e-09	0.15763
11q13.5	rs10160518	Ulcerative colitis (strict definition, all Crohn cases excluded)	3.83e-09	0.16574
11q13.5	rs10160518	Inflammatory bowel disease	7.89e-09	0.10342
11q13.5	rs10160518	Ulcerative colitis (strict definition, require KELA, min 2 HDR)	1.03e-08	0.15228
11q13.5	rs10160518	UC patients in KELA-register ( KELA 208 prior to 1994, or ICD K51)	1.09e-08	0.13958
11q13.5	rs10160518	Mucosal proctocolitis	1.37e-08	0.16853
11q13.5	rs10160518	Ulcerative colitis	2.25e-08	0.11472
11q13.5	rs10160518	Childhood asthma (age<16) (more control exclusions)	3.78e-08	0.14526
11q13.5	rs10160518	Childhood asthma (age<16)	4.43e-08	0.14419
11q13.5	rs10160518	Chronic lower respiratory diseases	5.25e-08	0.04735
11q13.5	rs10160518	Asthma and allergy (more control exclusions)	7.07e-08	0.15423
11q13.5	rs10160518	Asthma and allergy	7.98e-08	0.15342
11q13.5	rs10160518	Diseases of the skin and subcutaneous tissue	8.65e-08	0.03737
11q13.5	rs10160518	Allergic asthma (mode) (more control exclusions)	1.42e-07	0.10501
11q13.5	rs10160518	Allergic asthma (mode)	1.7e-07	0.10428
11q13.5	rs10160518	Pollen allergy	2.33e-07	0.12841
11q13.5	rs10160518	Use of eye-antiallergens (taken as indicator of allergic/atopic conjunctivitis)	4.78e-07	0.06973
11q13.5	rs10160518	Allergic conjunctivitis	5.43e-07	0.068
11q13.5	rs10160518	Conjunctivitis	6.89e-07	0.05771
11q13.5	rs10160518	Asthma (mode)	7.88e-07	0.05415
11q13.5	rs10160518	Disorders of conjunctiva	2.44e-06	0.05202
11q13.5	rs10160518	Asthma (more control exclusions)	3.18e-06	0.0501
11q13.5	rs10160518	Asthma	4.91e-06	0.04901
11q13.5	rs10160518	Childhood allergy (age < 16)	5.34e-06	0.12753
11q13.5	rs10160518	Asthma (only as main-diagnosis) (more control exclusions)	5.4e-06	0.05223
11q13.5	rs10160518	Asthma (only as main-diagnosis)	7.77e-06	0.05133
11q13.5	rs10160518	Interstitial lung disease endpoints	1.11e-05	0.04298
11q13.5	rs10160518	Noninfective enteritis and colitis	1.2e-05	0.06447
11q13.5	rs10160518	Asthma, including avohilmo	1.34e-05	0.04143
11q13.5	rs10160518	Ulcerative rectosigmoiditis	1.37e-05	0.16353
12p13.31a	rs10849448	Acute appendicitis	3.56e-10	0.08223
12p13.31a	rs10849448	Diseases of appendix	1.19e-09	0.07714
12p13.31a	rs10849448	Appendicitis, broad definition	2.04e-09	0.07656
12p13.31a	rs10849448	Diseases of middle ear and mastoid	1.05e-08	-0.08358
12p13.31a	rs10849448	Nonsuppurative otitis media	6.26e-07	-0.12092
12p13.31a	rs10849448	Acute appendicitis, no complications	8.01e-07	0.07329
12p13.31a	rs10849448	Neurological diseases	1.36e-05	0.03331
12q13.2	rs705702	Type 1 diabetes without complications	2.22e-13	0.16665
12q13.2	rs705702	Type 1 diabetes, wide definition, subgroup 1	1.15e-12	0.16247
12q13.2	rs705702	Type 1 diabetes with ophthalmic complications	1.55e-11	0.19698
12q13.2	rs705702	Type 1 diabetes	1.9e-11	0.14057
12q13.2	rs705702	Type 1 diabetes, wide definition	2.26e-11	0.12992
12q13.2	rs705702	Hypothyroidism, strict autoimmune	1.24e-10	0.07399
12q13.2	rs705702	Hypothyroidism, strict autoimmune, 3 medication purchases required	2.85e-10	0.06767
12q13.2	rs705702	Autoimmune diseases	2.88e-10	0.056
12q13.2	rs705702	Diabetic ketoacidosis	8.97e-10	0.14153
12q13.2	rs705702	Hypothyroidism, other/unspecified	3.08e-09	0.06345
12q13.2	rs705702	Type 1 diabetes, strict definition	3.69e-08	0.17331
12q13.2	rs705702	Type 1 diabetes, strict definition, subgroup 1	6.06e-08	0.17651
12q13.2	rs705702	Type1 diabetes, definitions combined	7.93e-08	0.16296
12q13.2	rs705702	Type 1 diabetes, strict (exclude DM2)	1.34e-07	0.16075
12q13.2	rs705702	Type 1 diabetes with other specified/multiple/unspecified complications	3.02e-07	0.13588
12q13.2	rs705702	Type 1 diabetes with ketoacidosis	2.71e-06	0.1941
12q13.2	rs705702	Disorders of the thyroid gland	4e-06	0.04571
12q13.2	rs705702	Unspecified diabetes	4.78e-06	0.11092
12q13.2	rs705702	Hypothyroidism and >3 levothyroxin purchases	5.92e-06	0.06196
12q13.2	rs705702	Hypothyroidism, levothyroxin purchases	5.92e-06	0.06196
12q13.2	rs705702	Diabetic retinopathy	6.14e-06	0.05764
12q13.2	rs705702	Hypothyroidism (congenital or acquired)	1.06e-05	0.06014
12q13.2	rs705702	Diabetic retinopathy	1.19e-05	0.10879
12q13.2	rs705702	Diabetic retinopathy (more control exclusions)	1.26e-05	0.05728
12q13.2	rs705702	Type 1 diabetes with renal complications	1.6e-05	0.20059
14q21.1	rs112672184	Dental caries, including primary care data	8.85e-07	0.33108
15q22.33	rs17293632	Asthma	1.91e-17	0.10252
15q22.33	rs17293632	Chronic lower respiratory diseases	1.98e-17	0.08322
15q22.33	rs17293632	Asthma (more control exclusions)	5.85e-17	0.10112
15q22.33	rs17293632	Asthma (mode)	7.28e-17	0.10284
15q22.33	rs17293632	Asthma (only as main-diagnosis)	2.42e-16	0.10585
15q22.33	rs17293632	Asthma/COPD (KELA code 203)	2.58e-16	0.09915
15q22.33	rs17293632	Asthma (only as main-diagnosis) (more control exclusions)	6.32e-16	0.1043
15q22.33	rs17293632	Asthma, including avohilmo	2.44e-15	0.08479
15q22.33	rs17293632	Asthma, hospital admissions , main diagnosis only	3.73e-15	0.09797
15q22.33	rs17293632	Asthma-related infections	4.24e-09	0.09409
15q22.33	rs17293632	Malignant neoplasm of thyroid gland	1.67e-08	0.26287
15q22.33	rs17293632	Childhood asthma (age<16)	2.09e-08	0.16686
15q22.33	rs17293632	Childhood asthma (age<16) (more control exclusions)	2.75e-08	0.1658
15q22.33	rs17293632	Malignant neoplasm of thyroid gland (controls excluding all cancers)	2.87e-08	0.25845
15q22.33	rs17293632	Asthma-related acute respiratory infections	7.06e-08	0.09883
15q22.33	rs17293632	Allergic asthma (mode)	1.15e-07	0.119
15q22.33	rs17293632	Coronary revascularization (ANGIO or CABG)	1.22e-07	-0.09157
15q22.33	rs17293632	Allergic asthma (mode) (more control exclusions)	1.53e-07	0.11783
15q22.33	rs17293632	Asthma, unspecified (mode)	2.57e-07	0.0841
15q22.33	rs17293632	Malignant neoplasm of endocrine gland	2.71e-07	0.22845
15q22.33	rs17293632	Asthma, unspecified (mode) (more control exclusions)	3.94e-07	0.08313
15q22.33	rs17293632	Malignant neoplasm of endocrine gland (controls excluding all cancers)	4.56e-07	0.22414
15q22.33	rs17293632	First line medication for Crohns disease (including steroids)	5.27e-07	0.04405
15q22.33	rs17293632	Other disorders originating in the perinatal period	8.06e-07	0.68505
15q22.33	rs17293632	Haemmorrhoids and perianal venous thrombosis	9.66e-07	0.12506
15q22.33	rs17293632	Childhood allergy (age < 16)	1.74e-06	0.15119
15q22.33	rs17293632	Suggestive for eosinophilic asthma	2.33e-06	0.20515
15q22.33	rs17293632	Coronary artery bypass grafting	6.71e-06	-0.10553
15q22.33	rs17293632	Major coronary heart disease event	7.62e-06	-0.05985
15q22.33	rs17293632	Coronary atherosclerosis	1.06e-05	-0.05708
15q22.33	rs17293632	Ischaemic heart disease, wide definition	1.31e-05	-0.04954
16p13.13	rs8064154	Asthma/COPD (KELA code 203)	2.93e-08	-0.06406
16p13.13	rs8064154	Suggestive for eosinophilic asthma	3.93e-08	-0.22693
16p13.13	rs8064154	Asthma, hospital admissions , main diagnosis only	1.8e-07	-0.06206
16p13.13	rs8064154	Asthma (only as main-diagnosis)	1.94e-07	-0.06415
16p13.13	rs8064154	Asthma (only as main-diagnosis) (more control exclusions)	2.35e-07	-0.06371
16p13.13	rs8064154	Chronic lower respiratory diseases	5.7e-07	-0.04678
16p13.13	rs8064154	Allergic asthma (mode)	1.47e-06	-0.10307
16p13.13	rs8064154	Allergic asthma (mode) (more control exclusions)	1.47e-06	-0.10311
16p13.13	rs8064154	Asthma (mode)	1.57e-06	-0.05657
16p13.13	rs8064154	Asthma	3.58e-06	-0.0534
16p13.13	rs8064154	Asthma (more control exclusions)	3.99e-06	-0.05326
16p13.13	rs8064154	Asthma, including avohilmo	4.07e-06	-0.04712
16p12.1	rs74630264	Asthma (mode)	2.57e-13	-0.14736
16p12.1	rs74630264	Asthma, including avohilmo	4.18e-13	-0.12654
16p12.1	rs74630264	Asthma, hospital admissions , main diagnosis only	1e-12	-0.14494
16p12.1	rs74630264	Asthma (only as main-diagnosis)	1.75e-12	-0.1487
16p12.1	rs74630264	Asthma	2.03e-12	-0.13856
16p12.1	rs74630264	Asthma (only as main-diagnosis) (more control exclusions)	6.27e-12	-0.14494
16p12.1	rs74630264	Asthma (more control exclusions)	8.11e-12	-0.13504
16p12.1	rs74630264	Chronic lower respiratory diseases	3.68e-11	-0.10553
16p12.1	rs74630264	Allergic asthma (mode)	1.27e-10	-0.23539
16p12.1	rs74630264	Allergic asthma (mode) (more control exclusions)	1.91e-10	-0.23328
16p12.1	rs74630264	Asthma/COPD (KELA code 203)	2.2e-10	-0.12495
16p12.1	rs74630264	Interstitial lung disease endpoints	1.08e-09	0.10876
16p12.1	rs74630264	Papulosquamous disorders	1.14e-09	0.18966
16p12.1	rs74630264	Psoriasis	2.97e-09	0.22146
16p12.1	rs74630264	Psoriasis vulgaris	7.55e-09	0.26923
16p12.1	rs74630264	Second line medication for Crohns disease	1.08e-08	0.13844
16p12.1	rs74630264	Asthma and allergy	5.58e-08	-0.28532
16p12.1	rs74630264	Psoriatic and enteropathic arthropathies	5.97e-08	0.31231
16p12.1	rs74630264	Asthma and allergy (more control exclusions)	6.32e-08	-0.28452
16p12.1	rs74630264	Hypothyroidism, strict autoimmune	9.33e-08	0.10369
16p12.1	rs74630264	Arthropathic psoriasis	1.5e-07	0.31402
16p12.1	rs74630264	Psoriatic arthropathies	1.78e-07	0.32501
16p12.1	rs74630264	Autoimmune diseases	3.28e-07	0.07652
16p12.1	rs74630264	Psoriatic arthropathies, ICD10	9.01e-07	0.31325
16p12.1	rs74630264	Other psoriatic arthropathies	1.84e-06	0.30573
16p12.1	rs74630264	Hypothyroidism, other/unspecified	3.09e-06	0.08447
16p12.1	rs74630264	Hypothyroidism, strict autoimmune, 3 medication purchases required	7.53e-06	0.0812
16p12.1	rs74630264	Disorders of the thyroid gland	1.52e-05	0.07251
16p11.2	rs6565189	Migraine, unspecified, drug-induced	3.68e-06	-0.63494
17p11.2	rs573841223	Eustachian salpingitis and obstruction	2.7e-07	0.65077
17p11.2	rs573841223	Nonsuppurative otitis media	2.81e-07	0.35261
17p11.2	rs573841223	Diseases of middle ear and mastoid	4.57e-06	0.18653
17q12	rs3744374	Diseases of middle ear and mastoid	6.36e-06	-0.06676
17q21.1	rs3816470	Childhood asthma (age<16)	1.86e-29	-0.29787
17q21.1	rs3816470	Childhood asthma (age<16) (more control exclusions)	2.57e-29	-0.29777
17q21.1	rs3816470	Asthma (more control exclusions)	1.32e-17	-0.09197
17q21.1	rs3816470	Asthma (mode)	1.85e-17	-0.09335
17q21.1	rs3816470	Asthma	3.76e-17	-0.09046
17q21.1	rs3816470	Chronic lower respiratory diseases	6.28e-17	-0.0729
17q21.1	rs3816470	Asthma, including avohilmo	6.83e-17	-0.07965
17q21.1	rs3816470	Asthma-related infections	7.62e-16	-0.11475
17q21.1	rs3816470	Asthma (only as main-diagnosis) (more control exclusions)	1.29e-15	-0.09187
17q21.1	rs3816470	Asthma (only as main-diagnosis)	3.17e-15	-0.09058
17q21.1	rs3816470	Asthma, hospital admissions , main diagnosis only	1.65e-14	-0.0851
17q21.1	rs3816470	Asthma-related acute respiratory infections	3.68e-14	-0.12337
17q21.1	rs3816470	Asthma/COPD (KELA code 203)	2.47e-10	-0.06828
17q21.1	rs3816470	Allergic asthma (mode) (more control exclusions)	1.15e-09	-0.12188
17q21.1	rs3816470	Allergic asthma (mode)	1.47e-09	-0.12101
17q21.1	rs3816470	Malignant neoplasm of cervix uteri	6.55e-08	0.1672
17q21.1	rs3816470	Asthma-related pneumonia	7.2e-08	-0.0996
17q21.1	rs3816470	Malignant neoplasm of cervix uteri (controls excluding all cancers)	7.56e-08	0.16706
17q21.1	rs3816470	Asthma-related pneumonia or sepsis	8.19e-08	-0.09901
17q21.1	rs3816470	Asthma and allergy (more control exclusions)	1.59e-07	-0.15074
17q21.1	rs3816470	Asthma and allergy	1.77e-07	-0.14999
17q21.1	rs3816470	Acute sinusitis	1.52e-06	-0.06372
17q21.1	rs3816470	Acute bronchiolitis	6.03e-06	-0.19664
17q21.1	rs3816470	Asthma, unspecified (mode) (more control exclusions)	7.35e-06	-0.06537
17q21.1	rs3816470	Second line medication for Crohns disease	1.17e-05	0.05844
17q21.1	rs3816470	Asthma, unspecified (mode)	1.21e-05	-0.06352
17q21.1	rs3816470	Ulcerative colitis	1.32e-05	0.08954
17q21.1	rs3816470	COPD/asthma/ILD related infections	1.55e-05	-0.02881
17q21.1	rs3816470	COPD/asthma related infections	1.55e-05	-0.02881
17q21.32	rs28397663	Atopic dermatitis	2.18e-14	0.12867
17q21.32	rs28397663	Chronic lower respiratory diseases	2.08e-13	0.06416
17q21.32	rs28397663	Asthma (mode)	2.08e-13	0.0808
17q21.32	rs28397663	Antihypertensive medication - note that there are other indications	1.89e-12	0.05528
17q21.32	rs28397663	Asthma/COPD (KELA code 203)	2.36e-12	0.07571
17q21.32	rs28397663	Asthma, including avohilmo	4.8e-12	0.06602
17q21.32	rs28397663	Asthma	1.16e-11	0.07301
17q21.32	rs28397663	Asthma (more control exclusions)	1.32e-11	0.07295
17q21.32	rs28397663	Atopic dermatitis, strict definition	1.52e-11	0.12891
17q21.32	rs28397663	Atopic dermatitis, strict definition with reimbursement	3.23e-11	0.12398
17q21.32	rs28397663	Asthma (only as main-diagnosis)	7.65e-09	0.06651
17q21.32	rs28397663	Dermatitis and eczema	8.05e-09	0.05873
17q21.32	rs28397663	Asthma (only as main-diagnosis) (more control exclusions)	8.21e-09	0.06634
17q21.32	rs28397663	Allergic asthma (mode)	3.6e-08	0.11016
17q21.32	rs28397663	Allergic asthma (mode) (more control exclusions)	3.77e-08	0.11001
17q21.32	rs28397663	Asthma-related infections	7.3e-08	0.0768
17q21.32	rs28397663	Asthma, hospital admissions , main diagnosis only	8.97e-08	0.05938
17q21.32	rs28397663	Asthma-related acute respiratory infections	1.43e-07	0.08584
17q21.32	rs28397663	Hypertension	5.31e-07	0.04288
17q21.32	rs28397663	Hypertensive diseases	6.32e-07	0.04254
17q21.32	rs28397663	Hypertensive diseases (excluding secondary)	2.18e-06	0.04659
17q21.32	rs28397663	Childhood asthma (age<16)	2.58e-06	0.12407
17q21.32	rs28397663	Childhood asthma (age<16) (more control exclusions)	2.73e-06	0.124
17q21.32	rs28397663	Psychiatric diseases	4.09e-06	0.03416
17q21.32	rs28397663	Hypertension, essential	7.58e-06	0.04091
17q21.32	rs28397663	Statin medication	1.13e-05	0.03656
17q21.32	rs28397663	Diseases of the skin and subcutaneous tissue	1.19e-05	0.03071
19q13.33	rs281379	Type 1 diabetes, strict definition, subgroup 1	8.96e-08	0.16316
19q13.33	rs281379	Type 1 diabetes, strict definition	1.19e-07	0.156
19q13.33	rs281379	Viral and other specified intestinal infections	3.66e-07	-0.10834
19q13.33	rs281379	Intestinal infectious diseases	4.39e-07	-0.04918
19q13.33	rs281379	Type1 diabetes, definitions combined	5.24e-07	0.14245
19q13.33	rs281379	Type 1 diabetes, strict (exclude DM2)	1.12e-06	0.13885
19q13.33	rs281379	Statin medication	1.17e-06	0.0406
19q13.33	rs281379	Type 1 diabetes without complications	2.32e-06	0.10051
19q13.33	rs281379	Type 1 diabetes	7.76e-06	0.08772
19q13.33	rs281379	Type 1 diabetes with ophthalmic complications	8.75e-06	0.12173
19q13.33	rs281379	Type 1 diabetes, wide definition, subgroup 1	9.94e-06	0.0947
19q13.33	rs281379	Type 1 diabetes with other specified/multiple/unspecified complications	1.08e-05	0.10953
22q12.2	rs713875	Autoimmune diseases	2.91e-14	0.06211
22q12.2	rs713875	Type 1 diabetes	2.92e-11	0.12844
22q12.2	rs713875	Type 1 diabetes, wide definition, subgroup 1	8.37e-11	0.13702
22q12.2	rs713875	Type 1 diabetes without complications	1.03e-10	0.13535
22q12.2	rs713875	Hypothyroidism, strict autoimmune	1.65e-10	0.06765
22q12.2	rs713875	Type 1 diabetes, wide definition	7e-10	0.11047
22q12.2	rs713875	Hypothyroidism, other/unspecified	1.33e-09	0.0598
22q12.2	rs713875	Hypothyroidism, strict autoimmune, 3 medication purchases required	1.78e-09	0.05944
22q12.2	rs713875	Type 1 diabetes with other specified/multiple/unspecified complications	1.38e-08	0.13883
22q12.2	rs713875	Disorders of the thyroid gland	1.6e-08	0.05155
22q12.2	rs713875	Diabetic ketoacidosis	2.64e-08	0.11853
22q12.2	rs713875	Type 1 diabetes with ophthalmic complications	3.51e-08	0.14822
22q12.2	rs713875	Other diseases of upper respiratory tract	8.24e-08	0.0387
22q12.2	rs713875	Hypothyroidism (congenital or acquired)	2.31e-07	0.06511
22q12.2	rs713875	Hypothyroidism and >3 levothyroxin purchases	2.8e-07	0.06479
22q12.2	rs713875	Hypothyroidism, levothyroxin purchases	2.8e-07	0.06479
22q12.2	rs713875	Type 1 diabetes with ketoacidosis	4.72e-07	0.19121
22q12.2	rs713875	Glomerular diseases	8.34e-07	0.11849
22q12.2	rs713875	Endocrine, nutritional and metabolic diseases	1.13e-06	0.03333
22q12.2	rs713875	Unspecified diabetic retinopathy	1.24e-06	0.15124
22q12.2	rs713875	Type 1 diabetes, strict definition, subgroup 1	2.99e-06	0.14
22q12.2	rs713875	Proliferative diabetic retinopathy	7.15e-06	0.16038
22q12.2	rs713875	Diabetic retinopathy	1.3e-05	0.09982
22q12.2	rs713875	Hypothyroidism, drug reimbursement	1.36e-05	0.08651
22q12.2	rs713875	Type 1 diabetes with renal complications	1.54e-05	0.18437
Xq26.3	rs2491199	Endocrine, nutritional and metabolic diseases	3.39e-06	-0.02666

## Sheet: TableS8-Other_non-synonymous
Other non-synonymous variants linked using UK European LD panel
LOCUS	GWAS	RSID	CHR	POS	BETA	SE	PVAL	MAF	FINNISH ENRICHMENT	GENE	CONSEQUENCE	PUBMED	R2 with lead SNP
1p31.3	PHARYNGEAL DISEASE	rs2307145	1	67367844	-0.1017	0.0281	0.0003031	0.02945	0.621	IL12RB2	missense	-	-
1q21.3	NP (FUMA)	rs2230061	1	150755063	0.0949	0.02495	0.000143	0.351	0.983	CTSS	missense	Obesity	0.655
2q21.1	VAR (FUMA)	rs4988956	2	102351547	-0.06638	0.01632	4.75e-05	0.41	1.106	IL1RL1	missense	-	0.281
2q21.1	VAR (FUMA)	rs10192036	2	102351751	-0.06615	0.01632	5.05e-05	0.41	1.106	IL1RL1	missense	-	0.281
2q21.1	VAR (FUMA)	rs10204137	2	102351752	-0.0662	0.01632	4.99e-05	0.41	1.107	IL1RL1	missense	Multiple sclerosis; Obesity and inflammation mediators	0.281
2q21.1	VAR (FUMA)	rs10192157	2	102351896	-0.06595	0.01632	5.33e-05	0.41	1.109	IL1RL1	missense	Eczema?	0.281
2q21.1	VAR (FUMA)	rs10206753	2	102351902	-0.06642	0.01632	4.71e-05	0.41	1.108	IL1RL1	missense	Obesity and inflammation mediators	0.281
4q24a	IURD (FUMA)	rs2866413	4	102635920	-0.03463	0.00722	1.62e-06	0.468	~1	MANBA	missense	-	0.541
5q22.1	NP (FUMA)	rs11241095	5	111103810	-0.11081	0.02454	6.31e-06	0.388	1.34	WDR36	missense	Primary angle glaucoma	0.576
9q33.3	IURD (FUMA)	rs4574	9	124414882	0.03653	0.00732	6.08e-07	0.409	0.95	PSMB7	missense	-	0.298
9q33.3	CDTA (FUMA)	rs8176719	9	133257521	0.0588	0.01005	4.7e-09	0.457	1.28	ABO	frameshift	ABO blood group O determinant	0.924
16q22.1	CDTA (FUMA)	rs11548855	16	68304045	-0.10262	0.02033	4.44e-07	0.067	0.898	SLC7A6OS	missense	-	0.656
19q13.33	CRS (FUMA)	rs601338	19	48703417	0.07402	0.01542	1.58e-06	0.375	0.756	FUT2	stop gain	IBD, PBC, respiratory and gastrointestinal illness during infancy	0.85
19q13.33	CRS (FUMA)	rs2287922	19	48728969	0.05154	0.01519	0.000698	0.421	0.804	RASIP1	missense	-	0.55

## Sheet: TableS9-Genes_linked_to_loci
Phenotype	ENSG	GENE	CHR	START (hg19)	END (hg19)	STRAND	GENE_TYPE	entrezID	HUGO	pLI	ncRVIS	posMapSNPs	posMapMaxCADD	eqtlMapSNPs	eqtlMapminP	eqtlMapminQ	eqtlMapts	eqtlDirection	minGwasP	IndSigSNPs	FUMA Locus
Chronic Diseases of Tonsils and Adenoids	ENSG00000005844	ITGAL	16	30483979	30534506	1	protein_coding	3683	ITGAL	0.43034	-1.03162	5	4.704	3	0.000128974	3.82943e-07	GTEx/v8/Cells_Cultured_fibroblasts	-	4.48e-08	rs6565189	13
Chronic Diseases of Tonsils and Adenoids	ENSG00000011295	TTC19	17	15902694	15948329	1	protein_coding	54902	TTC19	1.0503e-10	1.1213	3	10.91	1	2.24752e-05	0.0143937	GTEx/v8/Brain_Hippocampus	-	6.5e-09	rs117204737;rs142141461;rs16951395	15:16:00
Chronic Diseases of Tonsils and Adenoids	ENSG00000023228	NDUFS1	2	206979541	207024327	-1	protein_coding	4719	NDUFS1	3.96655e-09	0.00415072	0	0	1	0.00011083	1.39254e-05	GTEx/v8/Skin_Sun_Exposed_Lower_leg	+	3.26e-08	rs56848317	6
Infectious and inflammatory respiratory diseases	ENSG00000033800	PIAS1	15	68346517	68483096	1	protein_coding	8554	PIAS1	0.997024	-0.402984	0	0	2	0.000235247	1.63989e-10	GTEx/v8/Thyroid	+	2.63e-08	rs17293632	11
Nasal polyps	ENSG00000038532	CLEC16A	16	11038345	11276046	1	protein_coding	23274	CLEC16A	0.010139	-1.65899	168	17.43	137	4.98677e-11	4.05582e-08	GTEx/v8/Adipose_Subcutaneous:GTEx/v8/Brain_Cerebellum:GTEx/v8/Breast_Mammary_Tissue:GTEx/v8/Colon_Transverse:GTEx/v8/Liver:GTEx/v8/Lung:GTEx/v8/Cells_Cultured_fibroblasts:GTEx/v8/Small_Intestine_Terminal_Ileum:GTEx/v8/Thyroid	-	3.37e-09	rs34540843;rs12935413	10
Chronic Diseases of Tonsils and Adenoids	ENSG00000039523	FAM65A	16	67552321	67580691	1	protein_coding	79567	FAM65A	0.895578	-0.435667	1	3.558	0	NA	NA	NA	NA	1.04e-06	rs34540843;rs12935413	14
Infectious and inflammatory respiratory diseases	ENSG00000044574	HSPA5	9	127997132	128003609	-1	protein_coding	3309	HSPA5	0.885689	-0.857996	0	0	1	0.000231073	0.0398094	GTEx/v8/Nerve_Tibial	-	1.13e-05	rs10116520	8
Chronic rhinosinusitis	ENSG00000063176	SPHK2	19	49122548	49133974	1	protein_coding	56848	SPHK2	8.66424e-06	-1.64118	0	0	50	1.09128e-07	4.47699e-22	GTEx/v8/Cells_Cultured_fibroblasts	-	2.49e-08	rs281379	5
Nasal polyps	ENSG00000065361	ERBB3	12	56473641	56497289	1	protein_coding	2065	ERBB3	4.35825e-06	-0.325931	5	10.33	31	4.52141e-09	0.049	DICE/T_CD4_naive:DICE/T_CD8_naive:DICE/T_CD4_TH1:DICE/T_CD4_TH17:DICE/T_CD4_TH1_17:DICE/T_CD4_naive_TREG	-	4.12e-08	rs705702	9
Chronic Diseases of Tonsils and Adenoids	ENSG00000201725	RNU6-304P	1	8943486	8943592	-1	snRNA	106481275	RNU6-304P	NA	NA	0	0	1	7.76182e-06	0.049	DICE/T_CD4_naive	+	2.16e-08	rs12082271	1
Chronic Diseases of Tonsils and Adenoids	ENSG00000227992	AC108463.2	2	111961541	111963792	-1	pseudogene	NA	NA	NA	NA	0	0	1	2.63858e-11	5.05613e-21	DICE/T_CD4_memory_TREG:GTEx/v8/Adipose_Subcutaneous:GTEx/v8/Adipose_Visceral_Omentum:GTEx/v8/Lung:GTEx/v8/Cells_Cultured_fibroblasts:GTEx/v8/Spleen:GTEx/v8/Thyroid	-	1.8e-11	rs62160676	4
Nasal polyps	ENSG00000072682	P4HA2	5	131527531	131631008	-1	protein_coding	8974	P4HA2	6.46128e-05	-0.308598	43	14.25	140	5.0853e-73	1.47413e-62	DICE/T_CD4_TH17:DICE/T_CD4_memory_TREG:GTEx/v8/Artery_Aorta:GTEx/v8/Artery_Coronary:GTEx/v8/Artery_Tibial:GTEx/v8/Brain_Cerebellar_Hemisphere:GTEx/v8/Brain_Cerebellum:GTEx/v8/Brain_Putamen_basal_ganglia:GTEx/v8/Breast_Mammary_Tissue:GTEx/v8/Colon_Sigmoid:GTEx/v8/Colon_Transverse:GTEx/v8/Esophagus_Gastroesophageal_Junction:GTEx/v8/Esophagus_Mucosa:GTEx/v8/Esophagus_Muscularis:GTEx/v8/Heart_Atrial_…	-	3.14e-09	rs17132288;rs56399423	5
Chronic Diseases of Tonsils and Adenoids	ENSG00000072736	NFATC3	16	68118654	68263162	1	protein_coding	4775	NFATC3	0.998062	0.527374	0	0	8	3.28847e-12	2.208e-21	GTEx/v8/Artery_Aorta:GTEx/v8/Artery_Tibial:GTEx/v8/Nerve_Tibial:GTEx/v8/Thyroid	-	2.92e-08	rs117556162	14
Infectious and inflammatory respiratory diseases	ENSG00000077009	NMRK2	19	3933101	3942414	1	protein_coding	27231	NMRK2	1.1663e-07	NA	0	0	3	1.88671e-05	0.0360161	GTEx/v8/Whole_Blood	+	2.29e-08	rs74178437	13
Chronic Diseases of Tonsils and Adenoids	ENSG00000077009	NMRK2	19	3933101	3942414	1	protein_coding	27231	NMRK2	1.1663e-07	NA	0	0	3	1.88671e-05	0.0360161	GTEx/v8/Whole_Blood	+	1.1e-08	rs74178437	18
Nasal polyps	ENSG00000077348	EXOSC5	19	41892279	41903384	-1	protein_coding	56915	EXOSC5	0.00119256	0.493718	0	0	6	3.02221e-06	0.0102674	GTEx/v8/Stomach	+	3.83e-07	rs338593	11
Infectious and inflammatory respiratory diseases	ENSG00000077463	SIRT6	19	4174106	4182601	-1	protein_coding	51548	SIRT6	0.0544712	-0.313813	0	0	3	4.34485e-05	1.35046e-44	GTEx/v8/Thyroid	+	2.29e-08	rs74178437	13
Chronic Diseases of Tonsils and Adenoids	ENSG00000077463	SIRT6	19	4174106	4182601	-1	protein_coding	51548	SIRT6	0.0544712	-0.313813	0	0	3	4.34485e-05	1.35046e-44	GTEx/v8/Thyroid	+	1.1e-08	rs74178437	18
Chronic Diseases of Tonsils and Adenoids	ENSG00000078668	VDAC3	8	42249142	42263415	1	protein_coding	7419	VDAC3	0.970696	NA	14	17.39	22	3.1007e-05	0.0204252	GTEx/v8/Nerve_Tibial	+	1.61e-09	rs142125570;rs73631760	10
Chronic rhinosinusitis	ENSG00000088002	SULT2B1	19	49055332	49102682	1	protein_coding	6820	SULT2B1	0.827919	0.00641937	0	0	1	3.37192e-05	7.35172e-19	GTEx/v8/Adipose_Subcutaneous	+	2.49e-08	rs281379	5
Chronic Diseases of Tonsils and Adenoids	ENSG00000093010	COMT	22	19929130	19957498	1	protein_coding	1312	COMT	0.000846658	0.33213	0	0	10	6.47658e-06	8.89293e-26	GTEx/v8/Adipose_Subcutaneous:GTEx/v8/Esophagus_Muscularis	+	3.19e-09	rs78426131	19
Infectious and inflammatory respiratory diseases	ENSG00000099219	ERMP1	9	5765076	5833117	-1	protein_coding	79956	ERMP1	4.54997e-05	1.07215	0	0	15	2.51875e-06	5.33415e-22	GTEx/v8/Whole_Blood	-	5.49e-10	rs2095044	7
Vasomotor and Allergic rhinitis	ENSG00000099219	ERMP1	9	5765076	5833117	-1	protein_coding	79956	ERMP1	4.54997e-05	1.07215	0	0	15	2.51875e-06	5.33415e-22	GTEx/v8/Whole_Blood	-	3.44e-08	rs2381416	3
Chronic rhinosinusitis	ENSG00000099219	ERMP1	9	5765076	5833117	-1	protein_coding	79956	ERMP1	4.54997e-05	1.07215	0	0	24	2.51875e-06	5.33415e-22	GTEx/v8/Whole_Blood	-	2.65e-15	rs2079;rs2095044;rs11506294	3
Nasal polyps	ENSG00000099219	ERMP1	9	5765076	5833117	-1	protein_coding	79956	ERMP1	4.54997e-05	1.07215	0	0	30	2.51875e-06	5.33415e-22	GTEx/v8/Whole_Blood:GTEx/v8/Thyroid	-	3.7e-35	rs2210465;rs2225537;rs2095044;rs11506294	6
Chronic Diseases of Tonsils and Adenoids	ENSG00000099377	HSD3B7	16	30996519	31000473	1	protein_coding	80270	HSD3B7	4.64185e-06	-0.867417	0	0	2	2.00377e-05	4.2279e-13	GTEx/v8/Adrenal_Gland	+	0.00011	rs6565189	13
Chronic Diseases of Tonsils and Adenoids	ENSG00000099889	ARVCF	22	19957419	20004331	-1	protein_coding	421	ARVCF	8.21839e-07	NA	0	0	13	5.85515e-07	5.30925e-39	GTEx/v8/Thyroid	+	2.39e-09	rs78426131	19
Chronic Diseases of Tonsils and Adenoids	ENSG00000099899	TRMT2A	22	20099389	20104915	-1	protein_coding	27037	TRMT2A	1.30588e-05	NA	0	0	11	7.48687e-09	4.34217e-16	GTEx/v8/Esophagus_Mucosa:GTEx/v8/Skin_Not_Sun_Exposed_Suprapubic:GTEx/v8/Skin_Sun_Exposed_Lower_leg	+	2.39e-09	rs78426131	19
Chronic Diseases of Tonsils and Adenoids	ENSG00000099901	RANBP1	22	20103461	20114878	1	protein_coding	5902	RANBP1	0.336215	NA	1	0.561	0	NA	NA	NA	NA	NA	rs78426131	19
Chronic Diseases of Tonsils and Adenoids	ENSG00000099904	ZDHHC8	22	20116979	20135530	1	protein_coding	29801	ZDHHC8	0.988991	NA	6	12.74	14	3.26151e-21	1.02863e-31	GTEx/v8/Artery_Tibial:GTEx/v8/Cells_Cultured_fibroblasts	-	2.39e-09	rs78426131	19
Chronic Diseases of Tonsils and Adenoids	ENSG00000100263	RHBDD3	22	29655841	29664198	-1	protein_coding	25807	RHBDD3	2.0359e-05	-0.586027	0	0	1	7.38977e-05	0.00104851	GTEx/v8/Nerve_Tibial	NA	NA	rs6006220	20
Chronic Diseases of Tonsils and Adenoids	ENSG00000100280	AP1B1	22	29723669	29819168	-1	protein_coding	162	AP1B1	0.991583	-0.556109	0	0	1	0.000302131	0.0248264	GTEx/v8/Muscle_Skeletal	-	1.48e-07	rs5763378	20
Chronic Diseases of Tonsils and Adenoids	ENSG00000230499	AC108463.1	2	111953540	111964071	1	lincRNA	NA	NA	NA	NA	0	0	1	1.7384e-13	1.13304e-18	DICE/T_CD4_memory_TREG:GTEx/v8/Adipose_Subcutaneous:GTEx/v8/Adipose_Visceral_Omentum:GTEx/v8/Lung:GTEx/v8/Nerve_Tibial:GTEx/v8/Cells_Cultured_fibroblasts	-	1.8e-11	rs62160676	4
Chronic Diseases of Tonsils and Adenoids	ENSG00000263468	MIR3130-1	2	207647958	207648032	1	miRNA	100423002	MIR3130-1	NA	NA	0	0	5	2.57815e-05	0.049	DICE/T_CD4_TH1_17	+	9.46e-09	rs56848317	6
Diseases of Pulp and Periapical Tissues	ENSG00000100296	THOC5	22	29901868	29951205	-1	protein_coding	8563	THOC5	0.000462815	1.61267	0	0	80	1.30332e-07	9.19951e-146	GTEx/v8/Adipose_Subcutaneous:GTEx/v8/Adipose_Visceral_Omentum:GTEx/v8/Artery_Tibial:GTEx/v8/Breast_Mammary_Tissue:GTEx/v8/Esophagus_Mucosa:GTEx/v8/Esophagus_Muscularis:GTEx/v8/Lung:GTEx/v8/Muscle_Skeletal:GTEx/v8/Nerve_Tibial:GTEx/v8/Skin_Sun_Exposed_Lower_leg:GTEx/v8/Thyroid:GTEx/v8/Vagina	-	6.51e-10	rs9614155	1
Chronic Diseases of Tonsils and Adenoids	ENSG00000100314	CABP7	22	30116073	30127828	1	protein_coding	164633	CABP7	0.899633	NA	1	6.083	84	8.37805e-10	4.50362e-12	GTEx/v8/Brain_Cerebellar_Hemisphere:GTEx/v8/Brain_Cerebellum:GTEx/v8/Skin_Sun_Exposed_Lower_leg	-	5.52e-13	rs9608832;rs73162731;rs2857633;rs5763378	20
Diseases of Pulp and Periapical Tissues	ENSG00000100314	CABP7	22	30116073	30127828	1	protein_coding	164633	CABP7	0.899633	NA	0	0	81	8.37805e-10	4.50362e-12	GTEx/v8/Brain_Cerebellar_Hemisphere:GTEx/v8/Brain_Cerebellum	+	6.51e-10	rs9614155	1
Chronic Diseases of Tonsils and Adenoids	ENSG00000100319	ZMAT5	22	30126945	30163000	-1	protein_coding	55954	ZMAT5	0.000193623	-0.275603	13	16.23	42	1.2993e-06	3.92898e-08	GTEx/v8/Whole_Blood:GTEx/v8/Skin_Not_Sun_Exposed_Suprapubic:GTEx/v8/Skin_Sun_Exposed_Lower_leg	+	1.24e-19	rs10707434;rs2857633;rs131291;rs73162731;rs713875;rs41174	20
Diseases of Pulp and Periapical Tissues	ENSG00000100319	ZMAT5	22	30126945	30163000	-1	protein_coding	55954	ZMAT5	0.000193623	-0.275603	7	4.06	0	NA	NA	NA	NA	1.02e-07	rs9614155	1
Chronic Diseases of Tonsils and Adenoids	ENSG00000109320	NFKB1	4	103422486	103538459	1	protein_coding	4790	NFKB1	0.99426	NA	76	19.81	105	5.87572e-14	2.13484e-12	DICE/T_CD4_naive:DICE/Monocyte_non_classical:GTEx/v8/Whole_Blood:GTEx/v8/Artery_Tibial:GTEx/v8/Breast_Mammary_Tissue:GTEx/v8/Colon_Transverse:GTEx/v8/Heart_Atrial_Appendage:GTEx/v8/Muscle_Skeletal:GTEx/v8/Cells_Cultured_fibroblasts:GTEx/v8/Skin_Not_Sun_Exposed_Suprapubic	-	5.53e-11	rs4648052	8
Diseases of Pulp and Periapical Tissues	ENSG00000100325	ASCC2	22	30184597	30234271	-1	protein_coding	84164	ASCC2	0.178385	-0.345582	7	8.066	63	2.60299e-05	1.66232e-09	GTEx/v8/Whole_Blood:GTEx/v8/Brain_Cerebellar_Hemisphere	+	6.51e-10	rs9614155	1
Chronic Diseases of Tonsils and Adenoids	ENSG00000100330	MTMR3	22	30279144	30426855	1	protein_coding	8897	MTMR3	0.994952	0.321111	107	21	286	5.09664e-22	6.99619e-35	GTEx/v8/Adipose_Subcutaneous:GTEx/v8/Whole_Blood:GTEx/v8/Artery_Aorta:GTEx/v8/Artery_Tibial:GTEx/v8/Brain_Cerebellar_Hemisphere:GTEx/v8/Brain_Cerebellum:GTEx/v8/Brain_Hypothalamus:GTEx/v8/Breast_Mammary_Tissue:GTEx/v8/Colon_Transverse:GTEx/v8/Esophagus_Gastroesophageal_Junction:GTEx/v8/Esophagus_Mucosa:GTEx/v8/Esophagus_Muscularis:GTEx/v8/Heart_Atrial_Appendage:GTEx/v8/Heart_Left_Ventricle:GTEx/v…	+	1.24e-19	rs10707434;rs131291;rs73162731;rs9608832;rs713875;rs41174;rs2074204;rs2857633;rs5763378	20
Diseases of Pulp and Periapical Tissues	ENSG00000100330	MTMR3	22	30279144	30426855	1	protein_coding	8897	MTMR3	0.994952	0.321111	42	15.58	81	5.09664e-22	6.99619e-35	GTEx/v8/Adipose_Subcutaneous:GTEx/v8/Whole_Blood:GTEx/v8/Artery_Tibial:GTEx/v8/Lung:GTEx/v8/Muscle_Skeletal:GTEx/v8/Nerve_Tibial:GTEx/v8/Cells_Cultured_fibroblasts:GTEx/v8/Skin_Not_Sun_Exposed_Suprapubic:GTEx/v8/Skin_Sun_Exposed_Lower_leg	+	6.51e-10	rs9614155	1
Chronic Diseases of Tonsils and Adenoids	ENSG00000102886	GDPD3	16	30116131	30125177	-1	protein_coding	79153	GDPD3	1.05165e-07	-0.375161	0	0	2	3.65551e-05	1.55192e-18	GTEx/v8/Artery_Coronary:GTEx/v8/Lung	+	0.00011	rs6565189	13
Chronic Diseases of Tonsils and Adenoids	ENSG00000102974	CTCF	16	67596310	67673086	1	protein_coding	10664	CTCF	0.997925	-0.536093	1	4.081	0	NA	NA	NA	NA	3.91e-08	rs117556162	14
Chronic Diseases of Tonsils and Adenoids	ENSG00000103061	SLC7A6OS	16	68318406	68344849	-1	protein_coding	84138	SLC7A6OS	0.807327	-1.88576	1	26	0	NA	NA	NA	NA	4.44e-07	rs117556162	14
Chronic Diseases of Tonsils and Adenoids	ENSG00000103064	SLC7A6	16	68298433	68335722	1	protein_coding	9057	SLC7A6	0.0224285	-2.22129	0	0	7	5.70277e-08	1.41307e-41	GTEx/v8/Whole_Blood:GTEx/v8/Thyroid	+	2.92e-08	rs117556162	14
Chronic Diseases of Tonsils and Adenoids	ENSG00000103510	KAT8	16	31127075	31142714	1	protein_coding	84148	KAT8	0.912576	0.0373929	0	0	5	2.46252e-06	2.85637e-50	GTEx/v8/Artery_Tibial:GTEx/v8/Breast_Mammary_Tissue:GTEx/v8/Skin_Not_Sun_Exposed_Suprapubic:GTEx/v8/Skin_Sun_Exposed_Lower_leg:GTEx/v8/Stomach:GTEx/v8/Thyroid	+	4.48e-08	rs6565189	13
Infectious and inflammatory respiratory diseases	ENSG00000103591	AAGAB	15	67493371	67547533	-1	protein_coding	79719	AAGAB	0.00810207	0.196795	0	0	18	1.27381e-05	0.000452265	GTEx/v8/Whole_Blood:GTEx/v8/Esophagus_Mucosa:GTEx/v8/Thyroid	-	2.63e-08	rs17293632	11
Chronic Diseases of Tonsils and Adenoids	ENSG00000104365	IKBKB	8	42128820	42189973	1	protein_coding	3551	IKBKB	0.998787	-0.717758	27	7.181	38	1.18018e-08	2.51545e-05	GTEx/v8/Muscle_Skeletal	+	2.26e-09	rs142125570;rs73631760	10
Chronic Diseases of Tonsils and Adenoids	ENSG00000104368	PLAT	8	42032236	42065242	-1	protein_coding	5327	PLAT	0.00019718	-0.47843	1	2.458	56	6.89483e-09	5.98953e-28	GTEx/v8/Adipose_Subcutaneous:GTEx/v8/Muscle_Skeletal:GTEx/v8/Nerve_Tibial:GTEx/v8/Cells_Cultured_fibroblasts:GTEx/v8/Skin_Sun_Exposed_Lower_leg	+	2.26e-09	rs142125570;rs73631760	10
Chronic Diseases of Tonsils and Adenoids	ENSG00000104371	DKK4	8	42231586	42234750	-1	protein_coding	27121	DKK4	0.0213798	-0.118641	1	0.625	14	6.28924e-06	0.00107732	GTEx/v8/Adipose_Subcutaneous	+	2.17e-08	rs142125570	10
Infectious and inflammatory respiratory diseases	ENSG00000105229	PIAS4	19	4007644	4039384	1	protein_coding	51588	PIAS4	0.994351	NA	0	0	9	5.61931e-06	1.15512e-05	GTEx/v8/Skin_Not_Sun_Exposed_Suprapubic:GTEx/v8/Thyroid	-	2.29e-08	rs74178437	13
Chronic Diseases of Tonsils and Adenoids	ENSG00000105229	PIAS4	19	4007644	4039384	1	protein_coding	51588	PIAS4	0.994351	NA	0	0	9	5.61931e-06	1.15512e-05	GTEx/v8/Skin_Not_Sun_Exposed_Suprapubic:GTEx/v8/Thyroid	-	1.1e-08	rs74178437	18
Nasal polyps	ENSG00000105329	TGFB1	19	41807492	41859816	-1	protein_coding	7040	TGFB1	0.354133	NA	0	0	9	3.12282e-06	1.78207e-10	GTEx/v8/Adipose_Visceral_Omentum	-	3.83e-07	rs338593	11
Chronic rhinosinusitis	ENSG00000105499	PLA2G4C	19	48551100	48614074	-1	protein_coding	8605	PLA2G4C	4.41932e-08	-0.167967	0	0	28	5.66347e-06	6.55759e-11	GTEx/v8/Colon_Sigmoid	-	2.49e-08	rs281379	5
Chronic rhinosinusitis	ENSG00000105523	FAM83E	19	49104067	49118111	-1	protein_coding	54854	FAM83E	6.61984e-06	0.733475	0	0	51	9.70571e-09	4.44418e-18	GTEx/v8/Brain_Cerebellum:GTEx/v8/Esophagus_Mucosa:GTEx/v8/Nerve_Tibial:GTEx/v8/Skin_Not_Sun_Exposed_Suprapubic:GTEx/v8/Skin_Sun_Exposed_Lower_leg	+	2.49e-08	rs281379	5
Chronic rhinosinusitis	ENSG00000105538	RASIP1	19	49223844	49243978	-1	protein_coding	54922	RASIP1	0.975494	-0.59919	8	26.2	52	2.04933e-49	1.7155e-42	GTEx/v8/Artery_Aorta:GTEx/v8/Colon_Sigmoid:GTEx/v8/Colon_Transverse:GTEx/v8/Esophagus_Gastroesophageal_Junction:GTEx/v8/Esophagus_Mucosa:GTEx/v8/Esophagus_Muscularis:GTEx/v8/Heart_Atrial_Appendage:GTEx/v8/Ovary:GTEx/v8/Cells_Cultured_fibroblasts:GTEx/v8/Skin_Not_Sun_Exposed_Suprapubic:GTEx/v8/Skin_Sun_Exposed_Lower_leg:GTEx/v8/Stomach	+	2.49e-08	rs281379	5
Nasal polyps	ENSG00000107485	GATA3	10	8095567	8117161	1	protein_coding	2625	GATA3	0.882719	0.180851	20	18.5	34	2.19716e-70	4.8858e-62	GTEx/v8/Cells_Cultured_fibroblasts	-	1.05e-13	rs2275806;rs10905284;rs1775551;rs962993	07:08:00
Chronic Diseases of Tonsils and Adenoids	ENSG00000108474	PIGL	17	16120505	16252115	1	protein_coding	9487	PIGL	3.55119e-05	0.213751	1	0.886	0	NA	NA	NA	NA	3.92e-08	rs142141461	16
Infectious and inflammatory respiratory diseases	ENSG00000115602	IL1RL1	2	102927962	102968497	1	protein_coding	9173	IL1RL1	1.2806e-07	0.530986	24	11.18	94	6.62999e-20	1.4765e-62	DICE/T_CD4_naive_activated:DICE/T_CD8_naive_activated:GTEx/v8/Brain_Anterior_cingulate_cortex_BA24:GTEx/v8/Brain_Caudate_basal_ganglia:GTEx/v8/Brain_Cerebellar_Hemisphere:GTEx/v8/Brain_Cerebellum:GTEx/v8/Brain_Cortex:GTEx/v8/Brain_Frontal_Cortex_BA9:GTEx/v8/Brain_Hippocampus:GTEx/v8/Brain_Nucleus_accumbens_basal_ganglia:GTEx/v8/Brain_Putamen_basal_ganglia:GTEx/v8/Lung	+	2.69e-08	rs950881	1
Chronic Diseases of Tonsils and Adenoids	ENSG00000109323	MANBA	4	103552660	103682151	-1	protein_coding	4126	MANBA	1.14972e-11	-0.195397	0	0	111	1.05977e-11	2.97494e-51	DICE/T_CD4_naive:DICE/T_CD4_naive_activated:DICE/T_CD8_naive:DICE/T_CD8_naive_activated:DICE/T_CD4_TFH:DICE/T_CD4_TH17:DICE/T_CD4_TH2:DICE/T_CD4_memory_TREG:DICE/T_CD4_naive_TREG:GTEx/v8/Whole_Blood:GTEx/v8/Brain_Cerebellum:GTEx/v8/Cells_Cultured_fibroblasts:GTEx/v8/Skin_Not_Sun_Exposed_Suprapubic:GTEx/v8/Spleen	+	5.53e-11	rs4648052	8
Infectious and inflammatory respiratory diseases	ENSG00000115607	IL18RAP	2	103035149	103069025	1	protein_coding	8807	IL18RAP	0.366507	0.797204	13	9.847	90	9.33201e-14	2.96546e-47	DICE/T_CD4_memory_TREG:GTEx/v8/Whole_Blood:GTEx/v8/Skin_Not_Sun_Exposed_Suprapubic:GTEx/v8/Skin_Sun_Exposed_Lower_leg	+	2.69e-08	rs950881	1
Chronic Diseases of Tonsils and Adenoids	ENSG00000224207	RP11-10L12.1	4	103655515	103655772	1	pseudogene	NA	NA	NA	NA	0	0	102	9.42868e-08	0.049	DICE/Monocyte_non_classical:DICE/T_CD4_TH1_17:DICE/T_CD4_TH2:DICE/T_CD4_memory_TREG	+	5.53e-11	rs4648052	8
Infectious and inflammatory respiratory diseases	ENSG00000109332	UBE2D3	4	103715540	103790053	-1	protein_coding	7323	UBE2D3	0.748203	NA	0	0	133	8.76233e-11	8.8891e-17	GTEx/v8/Artery_Tibial:GTEx/v8/Esophagus_Mucosa:GTEx/v8/Lung:GTEx/v8/Muscle_Skeletal:GTEx/v8/Pancreas:GTEx/v8/Cells_Cultured_fibroblasts:GTEx/v8/Stomach	+	9.09e-10	rs17033015;rs4648051;rs230521	3
Chronic Diseases of Tonsils and Adenoids	ENSG00000109332	UBE2D3	4	103715540	103790053	-1	protein_coding	7323	UBE2D3	0.748203	NA	0	0	22	1.51243e-05	8.8891e-17	GTEx/v8/Muscle_Skeletal:GTEx/v8/Pancreas	+	6.7e-10	rs4648052	8
Infectious and inflammatory respiratory diseases	ENSG00000109320	NFKB1	4	103422486	103538459	1	protein_coding	4790	NFKB1	0.99426	NA	135	19.81	247	9.30281e-17	2.13484e-12	DICE/T_CD4_naive:DICE/Monocyte_non_classical:GTEx/v8/Whole_Blood:GTEx/v8/Breast_Mammary_Tissue:GTEx/v8/Colon_Transverse:GTEx/v8/Heart_Atrial_Appendage:GTEx/v8/Muscle_Skeletal:GTEx/v8/Cells_Cultured_fibroblasts:GTEx/v8/Skin_Not_Sun_Exposed_Suprapubic	-	4.88e-10	rs230521;rs4648051;rs17033015	3
Chronic Diseases of Tonsils and Adenoids	ENSG00000230069	LRRC37A15P	4	103648431	103651878	-1	pseudogene	106481796	LRRC37A15P	NA	NA	0	0	103	2.73581e-10	4.2733e-34	DICE/B_cell_naive:DICE/T_CD4_naive:DICE/Monocyte_classical:DICE/Monocyte_non_classical:DICE/T_CD4_TFH:DICE/T_CD4_TH17:DICE/T_CD4_TH1_17:DICE/T_CD4_TH2:DICE/T_CD4_memory_TREG:GTEx/v8/Adipose_Subcutaneous:GTEx/v8/Whole_Blood:GTEx/v8/Brain_Cerebellar_Hemisphere:GTEx/v8/Brain_Cerebellum:GTEx/v8/Breast_Mammary_Tissue:GTEx/v8/Esophagus_Mucosa:GTEx/v8/Lung:GTEx/v8/Nerve_Tibial:GTEx/v8/Cells_Cultured_fib…	+	5.53e-11	rs4648052	8
Chronic Diseases of Tonsils and Adenoids	ENSG00000248971	KRT8P46	4	103649903	103651328	-1	pseudogene	100418744	KRT8P46	NA	NA	0	0	111	1.20552e-13	2.58887e-31	DICE/T_CD4_naive:DICE/T_CD8_naive:DICE/Monocyte_classical:DICE/T_CD4_TFH:DICE/T_CD4_TH1:DICE/T_CD4_TH2:DICE/T_CD4_memory_TREG:GTEx/v8/Adipose_Subcutaneous:GTEx/v8/Adipose_Visceral_Omentum:GTEx/v8/Whole_Blood:GTEx/v8/Esophagus_Mucosa:GTEx/v8/Esophagus_Muscularis:GTEx/v8/Heart_Left_Ventricle:GTEx/v8/Lung:GTEx/v8/Muscle_Skeletal:GTEx/v8/Nerve_Tibial:GTEx/v8/Prostate:GTEx/v8/Skin_Not_Sun_Exposed_Supr…	+	5.53e-11	rs4648052	8
Nasal polyps	ENSG00000111540	RAB5B	12	56367697	56388490	1	protein_coding	5869	RAB5B	0.215699	-0.941662	16	21.2	42	7.13023e-118	2.12786e-104	GTEx/v8/Heart_Atrial_Appendage:GTEx/v8/Heart_Left_Ventricle:GTEx/v8/Muscle_Skeletal:GTEx/v8/Pituitary:GTEx/v8/Thyroid	-	3.67e-08	rs705702	9
Infectious and inflammatory respiratory diseases	ENSG00000113460	BRIX1	5	34915481	34926101	1	protein_coding	55299	BRIX1	0.981127	-0.981637	0	0	6	1.49398e-05	0.0149943	GTEx/v8/Brain_Hypothalamus	+	2.87e-08	rs7717955	5
Nasal polyps	ENSG00000113522	RAD50	5	131891711	131980313	1	protein_coding	10111	RAD50	3.45028e-15	-1.01827	0	0	37	4.22454e-05	0.000200277	GTEx/v8/Esophagus_Mucosa:GTEx/v8/Skin_Not_Sun_Exposed_Suprapubic	-	4.3e-09	rs17132288;rs56399423	5
Infectious and inflammatory respiratory diseases	ENSG00000115594	IL1R1	2	102681004	102796334	1	protein_coding	3554	IL1R1	0.362921	-0.0796714	0	0	45	5.48885e-07	1.17985e-09	GTEx/v8/Esophagus_Mucosa:GTEx/v8/Prostate:GTEx/v8/Stomach:GTEx/v8/Thyroid	+	2.69e-08	rs950881	1
Vasomotor and Allergic rhinitis	ENSG00000115594	IL1R1	2	102681004	102796334	1	protein_coding	3554	IL1R1	0.362921	-0.0796714	0	0	46	5.48885e-07	1.17985e-09	GTEx/v8/Brain_Caudate_basal_ganglia:GTEx/v8/Esophagus_Mucosa:GTEx/v8/Prostate:GTEx/v8/Stomach:GTEx/v8/Thyroid	+	5.02e-10	rs11690644	1
Chronic rhinosinusitis	ENSG00000115594	IL1R1	2	102681004	102796334	1	protein_coding	3554	IL1R1	0.362921	-0.0796714	0	0	44	5.48885e-07	1.17985e-09	GTEx/v8/Esophagus_Mucosa:GTEx/v8/Prostate:GTEx/v8/Stomach:GTEx/v8/Thyroid	+	2.1e-08	rs72823677	1
Nasal polyps	ENSG00000115594	IL1R1	2	102681004	102796334	1	protein_coding	3554	IL1R1	0.362921	-0.0796714	0	0	1	2.70524e-05	0.00587674	GTEx/v8/Skin_Sun_Exposed_Lower_leg	-	8.29e-08	rs141508079	2
Infectious and inflammatory respiratory diseases	ENSG00000115598	IL1RL2	2	102803433	102856462	1	protein_coding	8808	IL1RL2	1.96904e-07	0.469447	0	0	60	3.22091e-06	1.51728e-18	GTEx/v8/Brain_Nucleus_accumbens_basal_ganglia:GTEx/v8/Esophagus_Mucosa:GTEx/v8/Prostate:GTEx/v8/Skin_Not_Sun_Exposed_Suprapubic:GTEx/v8/Thyroid	+	3.08e-08	rs950881	1
Vasomotor and Allergic rhinitis	ENSG00000115598	IL1RL2	2	102803433	102856462	1	protein_coding	8808	IL1RL2	1.96904e-07	0.469447	0	0	59	3.22091e-06	1.73378e-19	GTEx/v8/Brain_Nucleus_accumbens_basal_ganglia:GTEx/v8/Esophagus_Mucosa:GTEx/v8/Prostate:GTEx/v8/Skin_Not_Sun_Exposed_Suprapubic:GTEx/v8/Skin_Sun_Exposed_Lower_leg:GTEx/v8/Thyroid	+	5.02e-10	rs11690644	1
Chronic rhinosinusitis	ENSG00000115598	IL1RL2	2	102803433	102856462	1	protein_coding	8808	IL1RL2	1.96904e-07	0.469447	0	0	60	3.22091e-06	1.51728e-18	GTEx/v8/Brain_Nucleus_accumbens_basal_ganglia:GTEx/v8/Esophagus_Mucosa:GTEx/v8/Prostate:GTEx/v8/Skin_Not_Sun_Exposed_Suprapubic:GTEx/v8/Thyroid	+	2.1e-08	rs72823677	1
Nasal polyps	ENSG00000115598	IL1RL2	2	102803433	102856462	1	protein_coding	8808	IL1RL2	1.96904e-07	0.469447	0	0	93	4.83012e-07	1.73378e-19	GTEx/v8/Brain_Nucleus_accumbens_basal_ganglia:GTEx/v8/Esophagus_Mucosa:GTEx/v8/Skin_Not_Sun_Exposed_Suprapubic:GTEx/v8/Skin_Sun_Exposed_Lower_leg:GTEx/v8/Thyroid	+	6.04e-13	rs56117144;rs13020553;rs141508079	2
Infectious and inflammatory respiratory diseases	ENSG00000109323	MANBA	4	103552660	103682151	-1	protein_coding	4126	MANBA	1.14972e-11	-0.195397	66	14.32	256	1.74576e-27	2.97494e-51	DICE/B_cell_naive:DICE/T_CD4_naive:DICE/T_CD4_naive_activated:DICE/T_CD8_naive:DICE/T_CD8_naive_activated:DICE/T_CD4_TFH:DICE/T_CD4_TH1:DICE/T_CD4_TH17:DICE/T_CD4_TH1_17:DICE/T_CD4_TH2:DICE/T_CD4_memory_TREG:DICE/T_CD4_naive_TREG:GTEx/v8/Whole_Blood:GTEx/v8/Artery_Aorta:GTEx/v8/Artery_Tibial:GTEx/v8/Brain_Cerebellum:GTEx/v8/Breast_Mammary_Tissue:GTEx/v8/Esophagus_Mucosa:GTEx/v8/Liver:GTEx/v8/Panc…	+	4.88e-10	rs17033015;rs4648051;rs230521	3
Vasomotor and Allergic rhinitis	ENSG00000115602	IL1RL1	2	102927962	102968497	1	protein_coding	9173	IL1RL1	1.2806e-07	0.530986	40	16.51	147	8.9557e-18	1.4765e-62	DICE/T_CD4_naive_activated:DICE/T_CD8_naive_activated:GTEx/v8/Brain_Anterior_cingulate_cortex_BA24:GTEx/v8/Brain_Caudate_basal_ganglia:GTEx/v8/Brain_Cerebellar_Hemisphere:GTEx/v8/Brain_Cerebellum:GTEx/v8/Brain_Cortex:GTEx/v8/Brain_Frontal_Cortex_BA9:GTEx/v8/Brain_Hippocampus:GTEx/v8/Brain_Nucleus_accumbens_basal_ganglia:GTEx/v8/Brain_Putamen_basal_ganglia:GTEx/v8/Lung	+	5.02e-10	rs11690644;rs10208293	1
Chronic rhinosinusitis	ENSG00000115602	IL1RL1	2	102927962	102968497	1	protein_coding	9173	IL1RL1	1.2806e-07	0.530986	24	11.18	89	6.62999e-20	1.4765e-62	DICE/T_CD4_naive_activated:DICE/T_CD8_naive_activated:GTEx/v8/Brain_Anterior_cingulate_cortex_BA24:GTEx/v8/Brain_Caudate_basal_ganglia:GTEx/v8/Brain_Cerebellar_Hemisphere:GTEx/v8/Brain_Cerebellum:GTEx/v8/Brain_Cortex:GTEx/v8/Brain_Frontal_Cortex_BA9:GTEx/v8/Brain_Hippocampus:GTEx/v8/Brain_Nucleus_accumbens_basal_ganglia:GTEx/v8/Brain_Putamen_basal_ganglia:GTEx/v8/Lung	+	2.1e-08	rs72823677	1
Nasal polyps	ENSG00000115602	IL1RL1	2	102927962	102968497	1	protein_coding	9173	IL1RL1	1.2806e-07	0.530986	41	16.51	162	5.74807e-30	1.4765e-62	DICE/T_CD4_naive_activated:GTEx/v8/Brain_Amygdala:GTEx/v8/Brain_Anterior_cingulate_cortex_BA24:GTEx/v8/Brain_Caudate_basal_ganglia:GTEx/v8/Brain_Cerebellar_Hemisphere:GTEx/v8/Brain_Cerebellum:GTEx/v8/Brain_Cortex:GTEx/v8/Brain_Frontal_Cortex_BA9:GTEx/v8/Brain_Hippocampus:GTEx/v8/Brain_Hypothalamus:GTEx/v8/Brain_Nucleus_accumbens_basal_ganglia:GTEx/v8/Brain_Putamen_basal_ganglia:GTEx/v8/Brain_Spin…	-	6.04e-13	rs13020553;rs56117144;rs141508079;rs10208293;rs6755905	2
Infectious and inflammatory respiratory diseases	ENSG00000115604	IL18R1	2	102927989	103015218	1	protein_coding	8809	IL18R1	5.02098e-07	0.218567	34	11.18	89	1.2528e-16	5.89246e-36	GTEx/v8/Adipose_Visceral_Omentum:GTEx/v8/Brain_Amygdala:GTEx/v8/Brain_Anterior_cingulate_cortex_BA24:GTEx/v8/Brain_Caudate_basal_ganglia:GTEx/v8/Brain_Cerebellar_Hemisphere:GTEx/v8/Brain_Cerebellum:GTEx/v8/Brain_Cortex:GTEx/v8/Brain_Frontal_Cortex_BA9:GTEx/v8/Brain_Hippocampus:GTEx/v8/Brain_Hypothalamus:GTEx/v8/Brain_Nucleus_accumbens_basal_ganglia:GTEx/v8/Brain_Putamen_basal_ganglia:GTEx/v8/Esop…	+	2.69e-08	rs950881	1
Vasomotor and Allergic rhinitis	ENSG00000115604	IL18R1	2	102927989	103015218	1	protein_coding	8809	IL18R1	5.02098e-07	0.218567	84	13.4	143	7.47718e-21	5.89246e-36	DICE/T_CD4_naive:DICE/T_CD4_naive_activated:DICE/T_CD4_TH2:DICE/T_CD4_naive_TREG:GTEx/v8/Adipose_Subcutaneous:GTEx/v8/Adipose_Visceral_Omentum:GTEx/v8/Whole_Blood:GTEx/v8/Artery_Aorta:GTEx/v8/Artery_Tibial:GTEx/v8/Brain_Amygdala:GTEx/v8/Brain_Anterior_cingulate_cortex_BA24:GTEx/v8/Brain_Caudate_basal_ganglia:GTEx/v8/Brain_Cerebellar_Hemisphere:GTEx/v8/Brain_Cerebellum:GTEx/v8/Brain_Cortex:GTEx/v8…	+	5.02e-10	rs11690644;rs10208293	1
Chronic rhinosinusitis	ENSG00000115604	IL18R1	2	102927989	103015218	1	protein_coding	8809	IL18R1	5.02098e-07	0.218567	34	11.18	84	1.2528e-16	5.89246e-36	GTEx/v8/Adipose_Visceral_Omentum:GTEx/v8/Brain_Amygdala:GTEx/v8/Brain_Anterior_cingulate_cortex_BA24:GTEx/v8/Brain_Caudate_basal_ganglia:GTEx/v8/Brain_Cerebellar_Hemisphere:GTEx/v8/Brain_Cerebellum:GTEx/v8/Brain_Cortex:GTEx/v8/Brain_Frontal_Cortex_BA9:GTEx/v8/Brain_Hippocampus:GTEx/v8/Brain_Hypothalamus:GTEx/v8/Brain_Nucleus_accumbens_basal_ganglia:GTEx/v8/Brain_Putamen_basal_ganglia:GTEx/v8/Esop…	+	2.1e-08	rs72823677	1
Nasal polyps	ENSG00000115604	IL18R1	2	102927989	103015218	1	protein_coding	8809	IL18R1	5.02098e-07	0.218567	136	13.4	243	7.47718e-21	5.89246e-36	DICE/B_cell_naive:DICE/T_CD4_naive:DICE/T_CD4_naive_activated:DICE/NK:DICE/T_CD4_TFH:DICE/T_CD4_TH1:DICE/T_CD4_TH17:DICE/T_CD4_TH1_17:DICE/T_CD4_TH2:DICE/T_CD4_memory_TREG:DICE/T_CD4_naive_TREG:GTEx/v8/Adipose_Subcutaneous:GTEx/v8/Adipose_Visceral_Omentum:GTEx/v8/Whole_Blood:GTEx/v8/Artery_Aorta:GTEx/v8/Artery_Tibial:GTEx/v8/Brain_Anterior_cingulate_cortex_BA24:GTEx/v8/Brain_Caudate_basal_ganglia…	+	6.04e-13	rs13020553;rs56117144;rs141508079;rs10208293;rs6755905	2
Infectious and inflammatory respiratory diseases	ENSG00000145354	CISD2	4	103790135	103810399	1	protein_coding	493856	CISD2	0.649111	-0.514322	0	0	142	7.47995e-15	1.15883e-30	DICE/T_CD4_naive:GTEx/v8/Adipose_Subcutaneous:GTEx/v8/Adipose_Visceral_Omentum:GTEx/v8/Artery_Tibial:GTEx/v8/Brain_Cerebellum:GTEx/v8/Colon_Sigmoid:GTEx/v8/Colon_Transverse:GTEx/v8/Esophagus_Gastroesophageal_Junction:GTEx/v8/Esophagus_Mucosa:GTEx/v8/Esophagus_Muscularis:GTEx/v8/Lung:GTEx/v8/Nerve_Tibial:GTEx/v8/Cells_Cultured_fibroblasts:GTEx/v8/Skin_Not_Sun_Exposed_Suprapubic:GTEx/v8/Skin_Sun_Ex…	+	4.91e-10	rs17033015;rs4648051;rs230521	3
Vasomotor and Allergic rhinitis	ENSG00000115607	IL18RAP	2	103035149	103069025	1	protein_coding	8807	IL18RAP	0.366507	0.797204	13	9.847	141	4.47922e-19	2.96546e-47	DICE/T_CD4_memory_TREG:GTEx/v8/Whole_Blood:GTEx/v8/Skin_Not_Sun_Exposed_Suprapubic:GTEx/v8/Skin_Sun_Exposed_Lower_leg	+	5.02e-10	rs11690644;rs10208293	1
Chronic rhinosinusitis	ENSG00000115607	IL18RAP	2	103035149	103069025	1	protein_coding	8807	IL18RAP	0.366507	0.797204	13	9.847	85	9.33201e-14	2.96546e-47	DICE/T_CD4_memory_TREG:GTEx/v8/Whole_Blood:GTEx/v8/Skin_Not_Sun_Exposed_Suprapubic:GTEx/v8/Skin_Sun_Exposed_Lower_leg	+	2.1e-08	rs72823677	1
Nasal polyps	ENSG00000115607	IL18RAP	2	103035149	103069025	1	protein_coding	8807	IL18RAP	0.366507	0.797204	49	11.97	237	4.91658e-44	2.96546e-47	DICE/T_CD4_naive_activated:DICE/T_CD4_TFH:DICE/T_CD4_TH17:DICE/T_CD4_TH1_17:DICE/T_CD4_memory_TREG:DICE/T_CD4_naive_TREG:GTEx/v8/Adipose_Subcutaneous:GTEx/v8/Whole_Blood:GTEx/v8/Breast_Mammary_Tissue:GTEx/v8/Colon_Transverse:GTEx/v8/Esophagus_Mucosa:GTEx/v8/Esophagus_Muscularis:GTEx/v8/Cells_Cultured_fibroblasts:GTEx/v8/Skin_Not_Sun_Exposed_Suprapubic:GTEx/v8/Skin_Sun_Exposed_Lower_leg:GTEx/v8/Sp…	+	6.04e-13	rs6755905;rs56117144;rs141508079;rs13020553;rs10208293	2
Infectious and inflammatory respiratory diseases	ENSG00000115616	SLC9A2	2	103236166	103327777	1	protein_coding	6549	SLC9A2	0.481161	0.320886	0	0	85	1.83906e-07	6.2018e-40	GTEx/v8/Muscle_Skeletal:GTEx/v8/Thyroid	+	2.69e-08	rs950881	1
Vasomotor and Allergic rhinitis	ENSG00000115616	SLC9A2	2	103236166	103327777	1	protein_coding	6549	SLC9A2	0.481161	0.320886	0	0	84	9.67645e-07	6.2018e-40	GTEx/v8/Muscle_Skeletal:GTEx/v8/Thyroid	+	5.02e-10	rs11690644	1
Chronic rhinosinusitis	ENSG00000115616	SLC9A2	2	103236166	103327777	1	protein_coding	6549	SLC9A2	0.481161	0.320886	0	0	84	1.83906e-07	6.2018e-40	GTEx/v8/Muscle_Skeletal:GTEx/v8/Thyroid	+	2.1e-08	rs72823677	1
Nasal polyps	ENSG00000115616	SLC9A2	2	103236166	103327777	1	protein_coding	6549	SLC9A2	0.481161	0.320886	1	0.636	54	6.86847e-06	0.00673239	GTEx/v8/Brain_Cortex	+	6.04e-13	rs11688802;rs56117144;rs13020553;rs141508079	2
Chronic Diseases of Tonsils and Adenoids	ENSG00000116285	ERRFI1	1	8064464	8086368	-1	protein_coding	54206	ERRFI1	0.0465516	0.149373	0	0	25	3.54498e-13	3.71565e-09	GTEx/v8/Artery_Tibial:GTEx/v8/Cells_Cultured_fibroblasts	+	2.16e-08	rs12082271	1
Nasal polyps	ENSG00000118292	C1orf54	1	150240600	150253327	1	protein_coding	79630	C1orf54	0.178652	-0.647221	0	0	3	3.20857e-06	3.00044e-13	GTEx/v8/Heart_Atrial_Appendage	+	9.46e-10	rs2089081	1
Infectious and inflammatory respiratory diseases	ENSG00000224207	RP11-10L12.1	4	103655515	103655772	1	pseudogene	NA	NA	NA	NA	0	0	245	7.58237e-08	4.66808e-05	DICE/T_CD4_naive:DICE/T_CD8_naive:DICE/Monocyte_non_classical:DICE/T_CD4_TH1_17:DICE/T_CD4_TH2:DICE/T_CD4_memory_TREG:GTEx/v8/Lung	+	4.88e-10	rs17033015;rs4648051;rs230521	3
Vasomotor and Allergic rhinitis	ENSG00000119408	NEK6	9	127019885	127115586	1	protein_coding	10783	NEK6	0.644138	-0.314011	21	13.68	22	9.05207e-21	3.14087e-38	GTEx/v8/Whole_Blood:GTEx/v8/Brain_Cerebellar_Hemisphere:GTEx/v8/Breast_Mammary_Tissue:GTEx/v8/Lung:GTEx/v8/Nerve_Tibial:GTEx/v8/Pancreas:GTEx/v8/Prostate:GTEx/v8/Skin_Not_Sun_Exposed_Suprapubic:GTEx/v8/Skin_Sun_Exposed_Lower_leg:GTEx/v8/Thyroid	-	1.65e-08	rs3758213	4
Chronic Diseases of Tonsils and Adenoids	ENSG00000119440	LCN1P1	9	136100292	136103993	-1	pseudogene	286310	LCN1P1	NA	NA	0	0	16	5.28446e-06	1.97339e-17	GTEx/v8/Lung	NA	NA	rs576123	11
Infectious and inflammatory respiratory diseases	ENSG00000230069	LRRC37A15P	4	103648431	103651878	-1	pseudogene	106481796	LRRC37A15P	NA	NA	0	0	255	2.52611e-14	4.2733e-34	DICE/B_cell_naive:DICE/T_CD4_naive:DICE/T_CD8_naive:DICE/Monocyte_classical:DICE/Monocyte_non_classical:DICE/T_CD4_TFH:DICE/T_CD4_TH1:DICE/T_CD4_TH17:DICE/T_CD4_TH1_17:DICE/T_CD4_TH2:DICE/T_CD4_memory_TREG:DICE/T_CD4_naive_TREG:GTEx/v8/Adipose_Subcutaneous:GTEx/v8/Adipose_Visceral_Omentum:GTEx/v8/Adrenal_Gland:GTEx/v8/Whole_Blood:GTEx/v8/Artery_Aorta:GTEx/v8/Brain_Cerebellar_Hemisphere:GTEx/v8/Br…	+	4.88e-10	rs17033015;rs230521;rs4648051	3
Vasomotor and Allergic rhinitis	ENSG00000120211	INSL4	9	5231419	5235304	1	protein_coding	3641	INSL4	2.05846e-05	0.67711	0	0	1	2.6117e-05	0.049	DICE/T_CD4_memory_TREG	-	3.85e-08	rs2381416	3
Chronic rhinosinusitis	ENSG00000120211	INSL4	9	5231419	5235304	1	protein_coding	3641	INSL4	2.05846e-05	0.67711	0	0	1	2.6117e-05	0.049	DICE/T_CD4_memory_TREG	-	4.61e-16	rs2095044	3
Nasal polyps	ENSG00000120211	INSL4	9	5231419	5235304	1	protein_coding	3641	INSL4	2.05846e-05	0.67711	0	0	1	2.6117e-05	0.049	DICE/T_CD4_memory_TREG	-	1.99e-36	rs2095044	6
Nasal polyps	ENSG00000120215	MLANA	9	5890802	5910606	1	protein_coding	2315	MLANA	1.07617e-08	0.195356	2	8.164	0	NA	NA	NA	NA	1.61e-13	rs142620647	6
Nasal polyps	ENSG00000123411	IKZF4	12	56401443	56432219	1	protein_coding	64375	IKZF4	0.953608	-1.66787	5	8.449	45	4.0501e-12	2.87338e-08	DICE/T_CD4_memory_TREG:DICE/T_CD4_naive_TREG:GTEx/v8/Adipose_Subcutaneous:GTEx/v8/Cells_EBV-transformed_lymphocytes:GTEx/v8/Esophagus_Mucosa:GTEx/v8/Muscle_Skeletal:GTEx/v8/Pancreas:GTEx/v8/Skin_Not_Sun_Exposed_Suprapubic:GTEx/v8/Skin_Sun_Exposed_Lower_leg	+	3.67e-08	rs705702	9
Nasal polyps	ENSG00000125347	IRF1	5	131817301	131826490	-1	protein_coding	3659	IRF1	0.867789	0.555445	3	12.28	68	7.29193e-06	8.17464e-18	GTEx/v8/Muscle_Skeletal:GTEx/v8/Skin_Not_Sun_Exposed_Suprapubic:GTEx/v8/Skin_Sun_Exposed_Lower_leg	+	3.14e-09	rs56399423;rs17132288	5
Chronic Diseases of Tonsils and Adenoids	ENSG00000125409	TEKT3	17	15207128	15244958	-1	protein_coding	64518	TEKT3	3.19945e-14	0.0598698	27	9.827	24	1.4388e-12	9.21754e-53	GTEx/v8/Adipose_Subcutaneous:GTEx/v8/Adipose_Visceral_Omentum:GTEx/v8/Breast_Mammary_Tissue:GTEx/v8/Colon_Sigmoid:GTEx/v8/Nerve_Tibial	-	3.71e-08	rs16951395	15
Infectious and inflammatory respiratory diseases	ENSG00000126934	MAP2K2	19	4090319	4124126	-1	protein_coding	5605	MAP2K2	0.863261	NA	0	0	9	5.94461e-11	9.20608e-11	GTEx/v8/Artery_Aorta:GTEx/v8/Artery_Tibial:GTEx/v8/Brain_Cerebellar_Hemisphere:GTEx/v8/Colon_Sigmoid:GTEx/v8/Esophagus_Muscularis	-	2.29e-08	rs74178437	13
Chronic Diseases of Tonsils and Adenoids	ENSG00000126934	MAP2K2	19	4090319	4124126	-1	protein_coding	5605	MAP2K2	0.863261	NA	0	0	9	5.94461e-11	9.20608e-11	GTEx/v8/Artery_Aorta:GTEx/v8/Artery_Tibial:GTEx/v8/Brain_Cerebellar_Hemisphere:GTEx/v8/Colon_Sigmoid:GTEx/v8/Esophagus_Muscularis	-	1.1e-08	rs74178437	18
Chronic Diseases of Tonsils and Adenoids	ENSG00000128191	DGCR8	22	20067755	20099400	1	protein_coding	54487	DGCR8	0.999896	0.191673	0	0	11	8.82416e-07	1.46027e-10	GTEx/v8/Whole_Blood:GTEx/v8/Esophagus_Mucosa	-	2.39e-09	rs78426131	19
Chronic Diseases of Tonsils and Adenoids	ENSG00000251288	RP11-10L12.2	4	103672558	103673798	1	pseudogene	NA	NA	NA	NA	0	0	81	9.02867e-08	3.64038e-07	DICE/B_cell_naive:DICE/T_CD4_naive:DICE/T_CD8_naive:GTEx/v8/Thyroid	+	5.53e-11	rs4648052	8
Nasal polyps	ENSG00000131435	PDLIM4	5	131593364	131609147	1	protein_coding	8572	PDLIM4	0.924089	-0.0661677	4	11.41	137	3.88035e-29	3.07557e-23	GTEx/v8/Adipose_Subcutaneous:GTEx/v8/Adipose_Visceral_Omentum:GTEx/v8/Cells_EBV-transformed_lymphocytes:GTEx/v8/Artery_Tibial:GTEx/v8/Brain_Anterior_cingulate_cortex_BA24:GTEx/v8/Brain_Cortex:GTEx/v8/Brain_Frontal_Cortex_BA9:GTEx/v8/Brain_Hypothalamus:GTEx/v8/Breast_Mammary_Tissue:GTEx/v8/Heart_Left_Ventricle:GTEx/v8/Muscle_Skeletal:GTEx/v8/Pancreas:GTEx/v8/Pituitary:GTEx/v8/Prostate:GTEx/v8/Mino…	+	3.14e-09	rs56399423;rs17132288	5
Nasal polyps	ENSG00000131437	KIF3A	5	132028320	132073330	-1	protein_coding	11127	KIF3A	0.992416	-0.460356	0	0	35	8.42388e-06	1.44548e-23	GTEx/v8/Artery_Tibial:GTEx/v8/Colon_Sigmoid	-	3.22e-09	rs17132288;rs56399423	5
Chronic rhinosinusitis	ENSG00000132139	GAS2L2	17	34071530	34079897	-1	protein_coding	246176	GAS2L2	0.000457989	0.671338	1	14.95	0	NA	NA	NA	NA	9.94e-10	rs3744374	4
Chronic Diseases of Tonsils and Adenoids	ENSG00000132600	PRMT7	16	68344877	68392466	1	protein_coding	54496	PRMT7	8.30564e-09	-0.873099	0	0	8	3.7915e-15	1.92473e-59	GTEx/v8/Adipose_Subcutaneous:GTEx/v8/Adipose_Visceral_Omentum:GTEx/v8/Whole_Blood:GTEx/v8/Artery_Aorta:GTEx/v8/Artery_Coronary:GTEx/v8/Artery_Tibial:GTEx/v8/Brain_Caudate_basal_ganglia:GTEx/v8/Brain_Cerebellar_Hemisphere:GTEx/v8/Brain_Cerebellum:GTEx/v8/Brain_Cortex:GTEx/v8/Brain_Frontal_Cortex_BA9:GTEx/v8/Brain_Hippocampus:GTEx/v8/Brain_Nucleus_accumbens_basal_ganglia:GTEx/v8/Brain_Putamen_basal…	+	2.92e-08	rs117556162	14
Infectious and inflammatory respiratory diseases	ENSG00000133030	MPRIP	17	16945859	17120993	1	protein_coding	23164	MPRIP	0.870658	2.68113	1	1.071	0	NA	NA	NA	NA	1.23e-08	rs113160481	12
Chronic Diseases of Tonsils and Adenoids	ENSG00000133030	MPRIP	17	16945859	17120993	1	protein_coding	23164	MPRIP	0.870658	2.68113	1	1.071	0	NA	NA	NA	NA	3.42e-16	rs113160481	17
Infectious and inflammatory respiratory diseases	ENSG00000134987	WDR36	5	110427414	110466200	1	protein_coding	134430	WDR36	0.544024	2.18148	0	0	1	4.83769e-06	1.25517e-19	GTEx/v8/Adipose_Subcutaneous	-	6.66e-09	rs1837253	6
Vasomotor and Allergic rhinitis	ENSG00000134987	WDR36	5	110427414	110466200	1	protein_coding	134430	WDR36	0.544024	2.18148	34	7.582	121	7.86551e-12	1.76006e-21	GTEx/v8/Adipose_Subcutaneous:GTEx/v8/Adrenal_Gland:GTEx/v8/Artery_Aorta:GTEx/v8/Artery_Tibial:GTEx/v8/Brain_Cerebellar_Hemisphere:GTEx/v8/Brain_Cerebellum:GTEx/v8/Brain_Cortex:GTEx/v8/Breast_Mammary_Tissue:GTEx/v8/Colon_Transverse:GTEx/v8/Esophagus_Mucosa:GTEx/v8/Esophagus_Muscularis:GTEx/v8/Lung:GTEx/v8/Muscle_Skeletal:GTEx/v8/Nerve_Tibial:GTEx/v8/Pancreas:GTEx/v8/Cells_Cultured_fibroblasts:GTEx…	-	8.2e-12	rs79881201;rs1438673;rs72793573;rs465076;rs12517104	2
Chronic rhinosinusitis	ENSG00000134987	WDR36	5	110427414	110466200	1	protein_coding	134430	WDR36	0.544024	2.18148	35	7.582	43	7.86551e-12	1.76006e-21	GTEx/v8/Adipose_Subcutaneous:GTEx/v8/Adrenal_Gland:GTEx/v8/Artery_Aorta:GTEx/v8/Artery_Tibial:GTEx/v8/Brain_Cerebellar_Hemisphere:GTEx/v8/Brain_Cerebellum:GTEx/v8/Brain_Cortex:GTEx/v8/Breast_Mammary_Tissue:GTEx/v8/Colon_Transverse:GTEx/v8/Esophagus_Mucosa:GTEx/v8/Esophagus_Muscularis:GTEx/v8/Lung:GTEx/v8/Muscle_Skeletal:GTEx/v8/Pancreas:GTEx/v8/Cells_Cultured_fibroblasts:GTEx/v8/Skin_Not_Sun_Expo…	-	5.15e-13	rs17624673;rs1438673;rs79411074;rs1837253;rs12517104	2
Nasal polyps	ENSG00000134987	WDR36	5	110427414	110466200	1	protein_coding	134430	WDR36	0.544024	2.18148	57	12.97	162	7.86551e-12	1.76006e-21	GTEx/v8/Adipose_Subcutaneous:GTEx/v8/Adipose_Visceral_Omentum:GTEx/v8/Adrenal_Gland:GTEx/v8/Artery_Aorta:GTEx/v8/Artery_Tibial:GTEx/v8/Brain_Cerebellar_Hemisphere:GTEx/v8/Brain_Cerebellum:GTEx/v8/Brain_Cortex:GTEx/v8/Breast_Mammary_Tissue:GTEx/v8/Colon_Transverse:GTEx/v8/Esophagus_Mucosa:GTEx/v8/Esophagus_Muscularis:GTEx/v8/Lung:GTEx/v8/Muscle_Skeletal:GTEx/v8/Nerve_Tibial:GTEx/v8/Pancreas:GTEx/v…	-	1.07e-16	rs34962275;rs7722241;rs1438673;rs1837253;rs1457115;rs56858603;rs1457114;rs58743367;rs457734	4
Nasal polyps	ENSG00000135414	GDF11	12	56137064	56150911	1	protein_coding	10220	GDF11	0.963838	-1.57493	0	0	33	2.34954e-05	0.00641031	GTEx/v8/Muscle_Skeletal	-	3.67e-08	rs705702	9
Nasal polyps	ENSG00000135482	ZC3H10	12	56511943	56516278	1	protein_coding	84872	ZC3H10	0.79202	-0.739788	0	0	2	6.12994e-05	0.0306494	GTEx/v8/Skin_Sun_Exposed_Lower_leg	-	8.09e-05	rs705702	9
Infectious and inflammatory respiratory diseases	ENSG00000135953	MFSD9	2	103332299	103353347	-1	protein_coding	84804	MFSD9	7.7206e-06	1.80919	0	0	84	6.32647e-08	1.80284e-165	GTEx/v8/Whole_Blood	-	2.69e-08	rs950881	1
Vasomotor and Allergic rhinitis	ENSG00000135953	MFSD9	2	103332299	103353347	-1	protein_coding	84804	MFSD9	7.7206e-06	1.80919	0	0	83	6.32647e-08	1.80284e-165	GTEx/v8/Whole_Blood	-	5.02e-10	rs11690644	1
Chronic rhinosinusitis	ENSG00000135953	MFSD9	2	103332299	103353347	-1	protein_coding	84804	MFSD9	7.7206e-06	1.80919	0	0	84	6.32647e-08	1.80284e-165	GTEx/v8/Whole_Blood	-	2.1e-08	rs72823677	1
Infectious and inflammatory respiratory diseases	ENSG00000136930	PSMB7	9	127115745	127177723	-1	protein_coding	5695	PSMB7	0.941262	-0.188455	54	22.6	144	2.76915e-15	4.50256e-11	GTEx/v8/Adipose_Subcutaneous:GTEx/v8/Adipose_Visceral_Omentum:GTEx/v8/Artery_Aorta:GTEx/v8/Artery_Tibial:GTEx/v8/Brain_Cerebellum:GTEx/v8/Brain_Hippocampus:GTEx/v8/Breast_Mammary_Tissue:GTEx/v8/Colon_Sigmoid:GTEx/v8/Colon_Transverse:GTEx/v8/Esophagus_Gastroesophageal_Junction:GTEx/v8/Esophagus_Muscularis:GTEx/v8/Heart_Atrial_Appendage:GTEx/v8/Lung:GTEx/v8/Muscle_Skeletal:GTEx/v8/Nerve_Tibial:GTEx…	-	1.75e-10	rs10116520;rs17315546;rs3758213	8
Vasomotor and Allergic rhinitis	ENSG00000136930	PSMB7	9	127115745	127177723	-1	protein_coding	5695	PSMB7	0.941262	-0.188455	1	0.249	22	2.21299e-11	4.50256e-11	GTEx/v8/Adipose_Subcutaneous:GTEx/v8/Adipose_Visceral_Omentum:GTEx/v8/Artery_Aorta:GTEx/v8/Artery_Tibial:GTEx/v8/Brain_Cerebellum:GTEx/v8/Breast_Mammary_Tissue:GTEx/v8/Colon_Sigmoid:GTEx/v8/Colon_Transverse:GTEx/v8/Esophagus_Muscularis:GTEx/v8/Lung:GTEx/v8/Nerve_Tibial:GTEx/v8/Ovary:GTEx/v8/Pancreas:GTEx/v8/Cells_Cultured_fibroblasts:GTEx/v8/Thyroid	-	1.65e-08	rs3758213	4
Infectious and inflammatory respiratory diseases	ENSG00000137033	IL33	9	6215805	6257983	1	protein_coding	90865	IL33	1.05456e-08	0.958134	1	0.617	32	2.337e-06	4.40921e-08	GTEx/v8/Artery_Aorta:GTEx/v8/Brain_Caudate_basal_ganglia	+	3.34e-10	rs72699186;rs2095044	7
Vasomotor and Allergic rhinitis	ENSG00000137033	IL33	9	6215805	6257983	1	protein_coding	90865	IL33	1.05456e-08	0.958134	0	0	21	2.337e-06	4.40921e-08	GTEx/v8/Artery_Aorta:GTEx/v8/Brain_Caudate_basal_ganglia	+	2.38e-08	rs2381416	3
Chronic rhinosinusitis	ENSG00000137033	IL33	9	6215805	6257983	1	protein_coding	90865	IL33	1.05456e-08	0.958134	18	8.974	37	1.66818e-06	2.40742e-08	GTEx/v8/Artery_Aorta:GTEx/v8/Brain_Caudate_basal_ganglia:GTEx/v8/Brain_Cerebellum:GTEx/v8/Brain_Cortex:GTEx/v8/Skin_Not_Sun_Exposed_Suprapubic	+	4.61e-16	rs11506294;rs10975479;rs17498196;rs2095044	3
Nasal polyps	ENSG00000137033	IL33	9	6215805	6257983	1	protein_coding	90865	IL33	1.05456e-08	0.958134	19	8.974	103	4.70668e-07	2.40742e-08	GTEx/v8/Artery_Aorta:GTEx/v8/Brain_Caudate_basal_ganglia:GTEx/v8/Brain_Cerebellum:GTEx/v8/Brain_Cortex:GTEx/v8/Skin_Not_Sun_Exposed_Suprapubic:GTEx/v8/Skin_Sun_Exposed_Lower_leg	+	1.99e-36	rs11506294;rs10975479;rs10975504;rs2381426;rs76962799;rs111450597;rs76311067;rs2095044;rs2225537;rs10975557	6
Chronic Diseases of Tonsils and Adenoids	ENSG00000138400	MDH1B	2	207602487	207630271	-1	protein_coding	130752	MDH1B	5.81111e-12	-0.321444	2	2.845	22	2.67092e-13	1.33585e-24	GTEx/v8/Brain_Anterior_cingulate_cortex_BA24:GTEx/v8/Brain_Cerebellar_Hemisphere:GTEx/v8/Brain_Cerebellum:GTEx/v8/Brain_Cortex:GTEx/v8/Brain_Frontal_Cortex_BA9:GTEx/v8/Brain_Nucleus_accumbens_basal_ganglia:GTEx/v8/Brain_Putamen_basal_ganglia:GTEx/v8/Skin_Sun_Exposed_Lower_leg	+	9.43e-09	rs56848317	6
Infectious and inflammatory respiratory diseases	ENSG00000138777	PPA2	4	106290234	106395238	-1	protein_coding	27068	PPA2	9.23379e-06	0.321968	0	0	24	1.76517e-06	3.54404e-15	GTEx/v8/Whole_Blood:GTEx/v8/Heart_Left_Ventricle:GTEx/v8/Skin_Sun_Exposed_Lower_leg	+	3.36e-09	rs5860793	4
Chronic Diseases of Tonsils and Adenoids	ENSG00000138777	PPA2	4	106290234	106395238	-1	protein_coding	27068	PPA2	9.23379e-06	0.321968	9	4.747	68	3.11258e-10	1.12188e-26	GTEx/v8/Whole_Blood:GTEx/v8/Artery_Tibial:GTEx/v8/Brain_Caudate_basal_ganglia:GTEx/v8/Brain_Cortex:GTEx/v8/Esophagus_Gastroesophageal_Junction:GTEx/v8/Esophagus_Muscularis:GTEx/v8/Heart_Atrial_Appendage:GTEx/v8/Heart_Left_Ventricle:GTEx/v8/Muscle_Skeletal:GTEx/v8/Nerve_Tibial:GTEx/v8/Cells_Cultured_fibroblasts:GTEx/v8/Skin_Sun_Exposed_Lower_leg	-	1.67e-11	rs2647232;rs5860793	9
Chronic Diseases of Tonsils and Adenoids	ENSG00000138892	TTLL8	22	50453552	50495364	-1	protein_coding	164714	TTLL8	NA	NA	1	1.305	0	NA	NA	NA	NA	2.91e-05	rs12171069	21
Infectious and inflammatory respiratory diseases	ENSG00000139182	CLSTN3	12	7282294	7311541	1	protein_coding	9746	CLSTN3	0.997858	-0.454881	0	0	1	1.32483e-05	3.34366e-09	GTEx/v8/Adipose_Visceral_Omentum	NA	NA	rs10849449;rs12354	9
Peritonsillar Abscess	ENSG00000139182	CLSTN3	12	7282294	7311541	1	protein_coding	9746	CLSTN3	0.997858	-0.454881	0	0	1	1.32483e-05	3.34366e-09	GTEx/v8/Adipose_Visceral_Omentum	NA	NA	rs12354;rs10849449	3
Infectious and inflammatory respiratory diseases	ENSG00000246560	RP11-10L12.4	4	103749212	103765232	1	antisense	105377348	LOC105377348	NA	NA	0	0	149	5.54023e-12	9.57963e-12	GTEx/v8/Adipose_Subcutaneous:GTEx/v8/Cells_EBV-transformed_lymphocytes:GTEx/v8/Colon_Sigmoid:GTEx/v8/Lung:GTEx/v8/Nerve_Tibial:GTEx/v8/Pancreas:GTEx/v8/Pituitary:GTEx/v8/Prostate:GTEx/v8/Cells_Cultured_fibroblasts:GTEx/v8/Skin_Not_Sun_Exposed_Suprapubic:GTEx/v8/Stomach	-	2.17e-09	rs17033015;rs4648051;rs230521	3
Chronic Diseases of Tonsils and Adenoids	ENSG00000070501	POLB	8	42195972	42229326	1	protein_coding	5423	POLB	0.000157164	-0.415191	7	12.01	70	7.89705e-36	1.1658e-128	GTEx/v8/Cells_EBV-transformed_lymphocytes:GTEx/v8/Esophagus_Mucosa:GTEx/v8/Lung:GTEx/v8/Muscle_Skeletal:GTEx/v8/Skin_Not_Sun_Exposed_Suprapubic:GTEx/v8/Skin_Sun_Exposed_Lower_leg	+	1.61e-09	rs142125570;rs73631760	10
Chronic Diseases of Tonsils and Adenoids	ENSG00000070718	AP3M2	8	42010464	42029191	1	protein_coding	10947	AP3M2	4.4e-05	0.298674	0	0	48	2.37751e-06	2.59722e-64	GTEx/v8/Cells_EBV-transformed_lymphocytes:GTEx/v8/Cells_Cultured_fibroblasts	-	8.53e-09	rs142125570	10
Nasal polyps	ENSG00000139531	SUOX	12	56390964	56400425	1	protein_coding	6821	SUOX	0.00208477	0.565694	6	5.308	45	1.90606e-76	6.05537e-67	DICE/B_cell_naive:DICE/T_CD4_naive:DICE/T_CD8_naive:DICE/Monocyte_classical:DICE/Monocyte_non_classical:DICE/T_CD4_TH1:DICE/T_CD4_TH17:DICE/T_CD4_TH1_17:DICE/T_CD4_TH2:DICE/T_CD4_memory_TREG:DICE/T_CD4_naive_TREG:GTEx/v8/Adipose_Subcutaneous:GTEx/v8/Adipose_Visceral_Omentum:GTEx/v8/Adrenal_Gland:GTEx/v8/Whole_Blood:GTEx/v8/Artery_Aorta:GTEx/v8/Artery_Coronary:GTEx/v8/Artery_Tibial:GTEx/v8/Brain_A…	-	3.67e-08	rs705702	9
Chronic Diseases of Tonsils and Adenoids	ENSG00000141027	NCOR1	17	15932471	16121499	-1	protein_coding	9611	NCOR1	1	-0.470619	6	11.27	0	NA	NA	NA	NA	6.17e-09	rs142141461;rs117204737	16
Chronic Diseases of Tonsils and Adenoids	ENSG00000141084	RANBP10	16	67757005	67840555	-1	protein_coding	57610	RANBP10	0.951824	-2.1592	2	1.657	0	NA	NA	NA	NA	6.31e-08	rs117556162	14
Nasal polyps	ENSG00000142039	CCDC97	19	41816094	41830788	1	protein_coding	90324	CCDC97	2.83817e-08	-0.171306	0	0	1	4.5992e-05	2.33633e-08	GTEx/v8/Breast_Mammary_Tissue	NA	NA	rs338593	11
Chronic rhinosinusitis	ENSG00000142233	NTN5	19	49164664	49176338	-1	protein_coding	126147	NTN5	3.27017e-06	-0.402193	0	0	55	2.37283e-27	3.04764e-22	DICE/B_cell_naive:DICE/T_CD4_naive:DICE/Monocyte_classical:DICE/NK:DICE/T_CD4_TFH:DICE/T_CD4_TH17:DICE/T_CD4_TH1_17:DICE/T_CD4_TH2:DICE/T_CD4_memory_TREG:GTEx/v8/Adrenal_Gland:GTEx/v8/Whole_Blood:GTEx/v8/Artery_Tibial:GTEx/v8/Brain_Anterior_cingulate_cortex_BA24:GTEx/v8/Brain_Caudate_basal_ganglia:GTEx/v8/Brain_Cerebellar_Hemisphere:GTEx/v8/Brain_Cerebellum:GTEx/v8/Brain_Cortex:GTEx/v8/Brain_Fron…	+	2.49e-08	rs281379	5
Nasal polyps	ENSG00000143369	ECM1	1	150480538	150486265	1	protein_coding	1893	ECM1	7.32851e-08	0.615279	0	0	163	8.3094e-06	1.69843e-10	GTEx/v8/Skin_Not_Sun_Exposed_Suprapubic:GTEx/v8/Skin_Sun_Exposed_Lower_leg	-	3.41e-06	rs2089081	1
Nasal polyps	ENSG00000143374	TARS2	1	150459887	150480078	1	protein_coding	80222	TARS2	1.87456e-08	0.846507	0	0	59	4.42318e-05	3.6083e-11	GTEx/v8/Adipose_Subcutaneous:GTEx/v8/Artery_Tibial:GTEx/v8/Skin_Sun_Exposed_Lower_leg	-	2.17e-10	rs2089081	1
Nasal polyps	ENSG00000143379	SETDB1	1	150898739	150937213	1	protein_coding	9869	SETDB1	0.999997	-0.304221	29	12.23	222	1.26293e-14	1.55723e-10	DICE/T_CD8_naive:DICE/T_CD4_TH17:DICE/T_CD4_TH1_17:GTEx/v8/Adipose_Subcutaneous:GTEx/v8/Whole_Blood:GTEx/v8/Breast_Mammary_Tissue:GTEx/v8/Esophagus_Gastroesophageal_Junction:GTEx/v8/Esophagus_Muscularis:GTEx/v8/Lung:GTEx/v8/Nerve_Tibial:GTEx/v8/Skin_Not_Sun_Exposed_Suprapubic:GTEx/v8/Skin_Sun_Exposed_Lower_leg:GTEx/v8/Spleen	-	2.17e-10	rs2089081	1
Nasal polyps	ENSG00000143382	ADAMTSL4	1	150521884	150533413	1	protein_coding	54507	ADAMTSL4	7.08735e-16	-0.228888	0	0	143	2.34181e-05	5.60625e-72	GTEx/v8/Whole_Blood:GTEx/v8/Artery_Aorta:GTEx/v8/Esophagus_Mucosa	-	6.42e-08	rs2089081	1
Nasal polyps	ENSG00000143384	MCL1	1	150547032	150552066	-1	protein_coding	4170	MCL1	0.950093	-0.4059	8	13.57	6	7.9037e-05	2.4887e-10	GTEx/v8/Whole_Blood:GTEx/v8/Brain_Cerebellar_Hemisphere	+	2.05e-08	rs2089081	1
Nasal polyps	ENSG00000143387	CTSK	1	150768684	150780799	-1	protein_coding	1513	CTSK	0.000135211	-0.588567	6	6.265	248	3.93885e-52	2.08265e-43	DICE/B_cell_naive:DICE/T_CD4_naive:DICE/T_CD4_naive_activated:DICE/T_CD8_naive:DICE/T_CD8_naive_activated:DICE/Monocyte_classical:DICE/Monocyte_non_classical:DICE/NK:DICE/T_CD4_TFH:DICE/T_CD4_TH1:DICE/T_CD4_TH17:DICE/T_CD4_TH1_17:DICE/T_CD4_TH2:DICE/T_CD4_memory_TREG:DICE/T_CD4_naive_TREG:GTEx/v8/Adrenal_Gland:GTEx/v8/Whole_Blood:GTEx/v8/Artery_Aorta:GTEx/v8/Artery_Coronary:GTEx/v8/Brain_Caudate_…	+	2.17e-10	rs2089081	1
Nasal polyps	ENSG00000143398	PIP5K1A	1	151170425	151222012	1	protein_coding	8394	PIP5K1A	0.0145863	-0.371334	0	0	8	0.000147165	0.000329267	GTEx/v8/Skin_Sun_Exposed_Lower_leg	-	0.000255	rs2089081	1
Nasal polyps	ENSG00000143409	FAM63A	1	150969025	150980851	-1	protein_coding	55793	FAM63A	8.24251e-06	-0.357503	0	0	1	2.51799e-05	0.0132353	GTEx/v8/Skin_Sun_Exposed_Lower_leg	+	3.41e-06	rs2089081	1
Nasal polyps	ENSG00000143412	ANXA9	1	150954493	150968110	1	protein_coding	8416	ANXA9	3.36086e-14	0.18946	3	8.234	220	9.38512e-17	4.19438e-31	GTEx/v8/Artery_Tibial:GTEx/v8/Esophagus_Mucosa:GTEx/v8/Esophagus_Muscularis:GTEx/v8/Heart_Atrial_Appendage:GTEx/v8/Heart_Left_Ventricle:GTEx/v8/Muscle_Skeletal:GTEx/v8/Skin_Not_Sun_Exposed_Suprapubic:GTEx/v8/Skin_Sun_Exposed_Lower_leg:GTEx/v8/Thyroid	-	2.17e-10	rs2089081	1
Nasal polyps	ENSG00000143418	CERS2	1	150933059	150947479	-1	protein_coding	29956	CERS2	0.910163	NA	9	15.56	238	8.34249e-21	2.28511e-15	DICE/B_cell_naive:DICE/T_CD4_naive:DICE/T_CD8_naive:DICE/NK:DICE/T_CD4_TFH:DICE/T_CD4_TH17:DICE/T_CD4_TH1_17:DICE/T_CD4_TH2:DICE/T_CD4_memory_TREG:DICE/T_CD4_naive_TREG:GTEx/v8/Adipose_Subcutaneous:GTEx/v8/Artery_Aorta:GTEx/v8/Artery_Coronary:GTEx/v8/Artery_Tibial:GTEx/v8/Brain_Cerebellar_Hemisphere:GTEx/v8/Brain_Cerebellum:GTEx/v8/Esophagus_Mucosa:GTEx/v8/Lung:GTEx/v8/Nerve_Tibial:GTEx/v8/Ovary:…	+	2.17e-10	rs2089081	1
Nasal polyps	ENSG00000143420	ENSA	1	150573327	150602088	-1	protein_coding	2029	ENSA	0.16237	-0.472342	13	13.49	68	2.53649e-07	4.72739e-05	GTEx/v8/Esophagus_Mucosa:GTEx/v8/Muscle_Skeletal:GTEx/v8/Nerve_Tibial	+	2.17e-10	rs2089081	1
Nasal polyps	ENSG00000143434	SEMA6C	1	151104161	151119104	-1	protein_coding	10500	SEMA6C	5.65313e-05	-0.756767	0	0	4	2.65764e-06	3.70411e-27	GTEx/v8/Artery_Aorta:GTEx/v8/Ovary:GTEx/v8/Skin_Not_Sun_Exposed_Suprapubic:GTEx/v8/Skin_Sun_Exposed_Lower_leg:GTEx/v8/Thyroid	+	3.41e-06	rs2089081	1
Nasal polyps	ENSG00000143436	MRPL9	1	151732119	151736040	-1	protein_coding	65005	MRPL9	0.0513078	-0.632687	0	0	1	9.04937e-05	0.0246613	GTEx/v8/Brain_Cerebellar_Hemisphere	NA	NA	rs2089081	1
Nasal polyps	ENSG00000143437	ARNT	1	150782181	150849244	-1	protein_coding	405	ARNT	0.976348	-1.07282	49	15.55	247	7.20738e-30	5.86826e-24	DICE/T_CD4_naive:DICE/T_CD8_naive:DICE/NK:DICE/T_CD4_TFH:DICE/T_CD4_TH1:DICE/T_CD4_TH17:DICE/T_CD4_TH1_17:DICE/T_CD4_TH2:DICE/T_CD4_memory_TREG:DICE/T_CD4_naive_TREG:GTEx/v8/Adipose_Subcutaneous:GTEx/v8/Adipose_Visceral_Omentum:GTEx/v8/Whole_Blood:GTEx/v8/Artery_Aorta:GTEx/v8/Artery_Coronary:GTEx/v8/Artery_Tibial:GTEx/v8/Brain_Amygdala:GTEx/v8/Brain_Anterior_cingulate_cortex_BA24:GTEx/v8/Brain_Ca…	+	2.17e-10	rs2089081	1
Nasal polyps	ENSG00000143443	C1orf56	1	151020216	151024462	1	protein_coding	54964	C1orf56	0.00131728	0.573501	0	0	7	2.84817e-05	1.18442e-31	GTEx/v8/Skin_Not_Sun_Exposed_Suprapubic:GTEx/v8/Skin_Sun_Exposed_Lower_leg	-	5.7e-10	rs2089081	1
Nasal polyps	ENSG00000143452	HORMAD1	1	150670536	150693364	-1	protein_coding	84072	HORMAD1	0.00312691	-0.404097	6	10.64	248	3.1622e-128	3.28419e-139	DICE/Monocyte_classical:DICE/Monocyte_non_classical:DICE/NK:DICE/T_CD4_naive_TREG:GTEx/v8/Adipose_Subcutaneous:GTEx/v8/Adipose_Visceral_Omentum:GTEx/v8/Cells_EBV-transformed_lymphocytes:GTEx/v8/Whole_Blood:GTEx/v8/Artery_Coronary:GTEx/v8/Breast_Mammary_Tissue:GTEx/v8/Colon_Sigmoid:GTEx/v8/Colon_Transverse:GTEx/v8/Esophagus_Gastroesophageal_Junction:GTEx/v8/Esophagus_Mucosa:GTEx/v8/Esophagus_Muscu…	+	2.17e-10	rs2089081	1
Nasal polyps	ENSG00000143457	GOLPH3L	1	150618701	150669630	-1	protein_coding	55204	GOLPH3L	0.0221067	-0.592524	9	12.97	248	9.93193e-91	9.52301e-98	DICE/Monocyte_classical:DICE/Monocyte_non_classical:GTEx/v8/Whole_Blood:GTEx/v8/Artery_Aorta:GTEx/v8/Artery_Tibial:GTEx/v8/Brain_Cortex:GTEx/v8/Esophagus_Mucosa:GTEx/v8/Esophagus_Muscularis:GTEx/v8/Muscle_Skeletal:GTEx/v8/Nerve_Tibial:GTEx/v8/Skin_Not_Sun_Exposed_Suprapubic:GTEx/v8/Skin_Sun_Exposed_Lower_leg	+	2.17e-10	rs2089081	1
Chronic Diseases of Tonsils and Adenoids	ENSG00000144410	CPO	2	207804278	207834198	1	protein_coding	130749	CPO	1.82892e-13	-0.171277	0	0	14	8.49743e-09	2.71095e-07	GTEx/v8/Brain_Cerebellar_Hemisphere:GTEx/v8/Nerve_Tibial	-	9.46e-09	rs56848317	6
Peritonsillar Abscess	ENSG00000144815	NXPE3	3	101498046	101547073	1	protein_coding	91775	NXPE3	0.4021	-2.23804	0	0	4	1.60647e-05	1.02448e-36	GTEx/v8/Esophagus_Muscularis:GTEx/v8/Muscle_Skeletal	+	9.36e-09	rs1456200	1
Infectious and inflammatory respiratory diseases	ENSG00000248971	KRT8P46	4	103649903	103651328	-1	pseudogene	100418744	KRT8P46	NA	NA	0	0	256	1.57013e-15	2.58887e-31	DICE/T_CD4_naive:DICE/T_CD8_naive:DICE/Monocyte_classical:DICE/Monocyte_non_classical:DICE/T_CD4_TFH:DICE/T_CD4_TH1:DICE/T_CD4_TH17:DICE/T_CD4_TH1_17:DICE/T_CD4_TH2:DICE/T_CD4_memory_TREG:DICE/T_CD4_naive_TREG:GTEx/v8/Adipose_Subcutaneous:GTEx/v8/Adipose_Visceral_Omentum:GTEx/v8/Adrenal_Gland:GTEx/v8/Whole_Blood:GTEx/v8/Artery_Tibial:GTEx/v8/Brain_Cerebellum:GTEx/v8/Breast_Mammary_Tissue:GTEx/v8/…	+	4.88e-10	rs4648051;rs230521;rs17033015	3
Chronic Diseases of Tonsils and Adenoids	ENSG00000145354	CISD2	4	103790135	103810399	1	protein_coding	493856	CISD2	0.649111	-0.514322	0	0	32	2.27035e-05	2.48828e-23	GTEx/v8/Adipose_Visceral_Omentum:GTEx/v8/Skin_Not_Sun_Exposed_Suprapubic:GTEx/v8/Thyroid	+	5.22e-10	rs4648052	8
Infectious and inflammatory respiratory diseases	ENSG00000145626	UGT3A1	5	35951112	36001130	-1	protein_coding	133688	UGT3A1	5.21347e-10	1.50718	10	8.313	0	NA	NA	NA	NA	5.61e-06	rs7717955	5
Vasomotor and Allergic rhinitis	ENSG00000145777	TSLP	5	110405760	110413722	1	protein_coding	85480	TSLP	0.0447882	-0.0707486	5	4.427	160	2.47814e-76	3.23879e-64	DICE/T_CD4_naive_activated:DICE/T_CD8_naive:DICE/T_CD8_naive_activated:DICE/T_CD4_naive_TREG:GTEx/v8/Adipose_Subcutaneous:GTEx/v8/Adipose_Visceral_Omentum:GTEx/v8/Adrenal_Gland:GTEx/v8/Artery_Aorta:GTEx/v8/Artery_Coronary:GTEx/v8/Artery_Tibial:GTEx/v8/Brain_Anterior_cingulate_cortex_BA24:GTEx/v8/Brain_Caudate_basal_ganglia:GTEx/v8/Brain_Cerebellar_Hemisphere:GTEx/v8/Brain_Cerebellum:GTEx/v8/Brain…	+	8.2e-12	rs79881201;rs1438673;rs465076;rs72793573;rs12517104	2
Chronic rhinosinusitis	ENSG00000145777	TSLP	5	110405760	110413722	1	protein_coding	85480	TSLP	0.0447882	-0.0707486	5	4.427	74	2.47814e-76	3.23879e-64	DICE/T_CD4_naive_activated:DICE/T_CD8_naive:DICE/T_CD8_naive_activated:DICE/T_CD4_naive_TREG:GTEx/v8/Adipose_Subcutaneous:GTEx/v8/Adipose_Visceral_Omentum:GTEx/v8/Adrenal_Gland:GTEx/v8/Artery_Aorta:GTEx/v8/Artery_Coronary:GTEx/v8/Artery_Tibial:GTEx/v8/Brain_Anterior_cingulate_cortex_BA24:GTEx/v8/Brain_Caudate_basal_ganglia:GTEx/v8/Brain_Cerebellar_Hemisphere:GTEx/v8/Brain_Cerebellum:GTEx/v8/Brain…	+	5.15e-13	rs17624673;rs1438673;rs12517104	2
Nasal polyps	ENSG00000145777	TSLP	5	110405760	110413722	1	protein_coding	85480	TSLP	0.0447882	-0.0707486	7	12.18	217	2.47814e-76	3.23879e-64	DICE/T_CD4_naive_activated:DICE/T_CD8_naive:DICE/T_CD8_naive_activated:DICE/T_CD4_naive_TREG:GTEx/v8/Adipose_Subcutaneous:GTEx/v8/Adipose_Visceral_Omentum:GTEx/v8/Adrenal_Gland:GTEx/v8/Artery_Aorta:GTEx/v8/Artery_Coronary:GTEx/v8/Artery_Tibial:GTEx/v8/Brain_Anterior_cingulate_cortex_BA24:GTEx/v8/Brain_Caudate_basal_ganglia:GTEx/v8/Brain_Cerebellar_Hemisphere:GTEx/v8/Brain_Cerebellum:GTEx/v8/Brain…	+	7.87e-17	rs34962275;rs1438673;rs7722241;rs1457114;rs56858603;rs58743367;rs457734;rs9285875;rs1457115	4
Nasal polyps	ENSG00000147854	UHRF2	9	6413151	6507054	1	protein_coding	115426	UHRF2	0.999646	NA	2	4.453	0	NA	NA	NA	NA	4.11e-08	rs10739105	6
Chronic Diseases of Tonsils and Adenoids	ENSG00000148290	SURF1	9	136218610	136223552	-1	protein_coding	6834	SURF1	1.02064e-13	NA	0	0	13	2.29298e-13	2.67588e-56	GTEx/v8/Adipose_Subcutaneous:GTEx/v8/Adipose_Visceral_Omentum:GTEx/v8/Whole_Blood:GTEx/v8/Artery_Tibial:GTEx/v8/Brain_Anterior_cingulate_cortex_BA24:GTEx/v8/Brain_Cerebellum:GTEx/v8/Brain_Putamen_basal_ganglia:GTEx/v8/Breast_Mammary_Tissue:GTEx/v8/Colon_Sigmoid:GTEx/v8/Colon_Transverse:GTEx/v8/Esophagus_Gastroesophageal_Junction:GTEx/v8/Esophagus_Mucosa:GTEx/v8/Esophagus_Muscularis:GTEx/v8/Heart_…	-	1.84e-08	rs115478735;rs576123	11
Chronic Diseases of Tonsils and Adenoids	ENSG00000148297	MED22	9	136205160	136214986	-1	protein_coding	6837	MED22	0.00632214	-0.130266	0	0	6	4.68747e-05	2.03754e-50	GTEx/v8/Whole_Blood	+	1.84e-08	rs115478735	11
Chronic Diseases of Tonsils and Adenoids	ENSG00000148300	REXO4	9	136271186	136283164	-1	protein_coding	57109	REXO4	9.99455e-06	1.53085	0	0	4	3.64538e-05	2.33124e-24	GTEx/v8/Cells_Cultured_fibroblasts	-	3.36e-08	rs115478735	11
Infectious and inflammatory respiratory diseases	ENSG00000150361	KLHL1	13	70274726	70682591	-1	protein_coding	57626	KLHL1	0.00808344	1.16941	7	6.299	7	4.32553e-08	5.89549e-09	GTEx/v8/Brain_Cortex:GTEx/v8/Brain_Hippocampus	-	4.6e-08	rs9542155	10
Peritonsillar Abscess	ENSG00000150361	KLHL1	13	70274726	70682591	-1	protein_coding	57626	KLHL1	0.00808344	1.16941	96	15.74	57	6.71011e-08	5.89549e-09	GTEx/v8/Brain_Cerebellum:GTEx/v8/Brain_Cortex:GTEx/v8/Brain_Hippocampus	-	1.92e-14	rs2501220;rs3003202;rs9592672	4
Nasal polyps	ENSG00000151655	ITIH2	10	7745232	7791483	1	protein_coding	3698	ITIH2	7.06618e-10	0.120393	0	0	2	3.34387e-05	1.08022e-16	GTEx/v8/Nerve_Tibial	+	4.3e-07	rs2275806	7
Vasomotor and Allergic rhinitis	ENSG00000152495	CAMK4	5	110559351	110830584	1	protein_coding	814	CAMK4	0.0158297	0.0598155	44	17.53	88	4.19746e-10	1.12071e-22	DICE/B_cell_naive:GTEx/v8/Adipose_Visceral_Omentum:GTEx/v8/Cells_EBV-transformed_lymphocytes:GTEx/v8/Brain_Cerebellar_Hemisphere:GTEx/v8/Brain_Cerebellum:GTEx/v8/Breast_Mammary_Tissue:GTEx/v8/Nerve_Tibial	+	3.79e-09	rs465076;rs72793573;rs1438673	2
Chronic rhinosinusitis	ENSG00000152495	CAMK4	5	110559351	110830584	1	protein_coding	814	CAMK4	0.0158297	0.0598155	0	0	1	0.000103588	0.0026516	GTEx/v8/Breast_Mammary_Tissue	+	5.69e-08	rs1438673	2
Nasal polyps	ENSG00000152495	CAMK4	5	110559351	110830584	1	protein_coding	814	CAMK4	0.0158297	0.0598155	63	17.53	114	1.53167e-28	1.12071e-22	DICE/B_cell_naive:GTEx/v8/Adipose_Visceral_Omentum:GTEx/v8/Cells_EBV-transformed_lymphocytes:GTEx/v8/Whole_Blood:GTEx/v8/Brain_Cerebellar_Hemisphere:GTEx/v8/Brain_Cerebellum:GTEx/v8/Breast_Mammary_Tissue:GTEx/v8/Esophagus_Muscularis:GTEx/v8/Nerve_Tibial	+	2.89e-13	rs1457114;rs56858603;rs1457115;rs9285875;rs457734;rs1438673	4
Infectious and inflammatory respiratory diseases	ENSG00000152611	CAPSL	5	35904397	35938881	-1	protein_coding	133690	CAPSL	0.000440615	0.113538	7	6.975	0	NA	NA	NA	NA	3.27e-06	rs7717955	5
Chronic Diseases of Tonsils and Adenoids	ENSG00000156858	PRR14	16	30662038	30667761	1	protein_coding	78994	PRR14	0.258591	NA	0	0	1	0.000129141	0.0145664	GTEx/v8/Heart_Atrial_Appendage	-	0.00011	rs6565189	13
Peritonsillar Abscess	ENSG00000157542	KCNJ6	21	38979678	39288749	-1	protein_coding	3763	KCNJ6	0.812451	-0.293776	0	0	27	7.50457e-05	0.0482341	GTEx/v8/Cells_Cultured_fibroblasts	-	4.88e-08	rs9980837	5
Chronic Diseases of Tonsils and Adenoids	ENSG00000253389	RP11-930P14.1	8	41518509	41523084	1	antisense	NA	NA	NA	NA	0	0	5	3.22487e-05	0.049	DICE/T_CD4_TH1_17	+	2.43e-09	rs73631760	10
Nasal polyps	ENSG00000158985	CDC42SE2	5	130581186	130734140	1	protein_coding	56990	CDC42SE2	0.753729	-0.225977	4	3.085	80	3.17735e-08	4.42054e-08	GTEx/v8/Brain_Frontal_Cortex_BA9:GTEx/v8/Brain_Putamen_basal_ganglia:GTEx/v8/Skin_Not_Sun_Exposed_Suprapubic:GTEx/v8/Skin_Sun_Exposed_Lower_leg:GTEx/v8/Thyroid	-	3.87e-09	rs17132288;rs56399423	5
Nasal polyps	ENSG00000158987	RAPGEF6	5	130759614	130970929	-1	protein_coding	51735	RAPGEF6	0.998026	-0.743539	2	1.25	138	5.29962e-06	2.22107e-20	GTEx/v8/Artery_Aorta:GTEx/v8/Artery_Tibial:GTEx/v8/Muscle_Skeletal:GTEx/v8/Nerve_Tibial:GTEx/v8/Pituitary:GTEx/v8/Small_Intestine_Terminal_Ileum	+	3.14e-09	rs17132288;rs56399423	5
Chronic Diseases of Tonsils and Adenoids	ENSG00000159186	AC007383.6	2	207100960	207101595	-1	pseudogene	NA	NA	NA	NA	1	0.287	0	NA	NA	NA	NA	2.02e-08	rs75820432	5
Infectious and inflammatory respiratory diseases	ENSG00000251288	RP11-10L12.2	4	103672558	103673798	1	pseudogene	NA	NA	NA	NA	0	0	218	9.02867e-08	2.33536e-11	DICE/B_cell_naive:DICE/T_CD4_naive:DICE/T_CD8_naive:DICE/Monocyte_non_classical:DICE/T_CD4_TH1_17:GTEx/v8/Lung:GTEx/v8/Nerve_Tibial:GTEx/v8/Thyroid	+	4.88e-10	rs4648051;rs230521;rs17033015	3
Chronic Diseases of Tonsils and Adenoids	ENSG00000175164	ABO	9	136125788	136150617	-1	processed_transcript	28	ABO	NA	NA	60	15.84	66	1.70307e-86	7.08997e-76	DICE/Monocyte_classical:DICE/Monocyte_non_classical:GTEx/v8/Adipose_Subcutaneous:GTEx/v8/Adipose_Visceral_Omentum:GTEx/v8/Adrenal_Gland:GTEx/v8/Whole_Blood:GTEx/v8/Artery_Aorta:GTEx/v8/Artery_Coronary:GTEx/v8/Artery_Tibial:GTEx/v8/Brain_Anterior_cingulate_cortex_BA24:GTEx/v8/Brain_Cortex:GTEx/v8/Brain_Frontal_Cortex_BA9:GTEx/v8/Brain_Nucleus_accumbens_basal_ganglia:GTEx/v8/Breast_Mammary_Tissue:G…	+	2.51e-10	rs576123;rs115478735;rs633862	11
Chronic Diseases of Tonsils and Adenoids	ENSG00000111321	LTBR	12	6484211	6500733	1	protein_coding	4055	LTBR	0.428683	-0.265481	6	8.153	12	3.26489e-89	5.75011e-90	DICE/T_CD4_naive_activated:DICE/NK:DICE/T_CD4_naive_TREG:GTEx/v8/Adipose_Subcutaneous:GTEx/v8/Adipose_Visceral_Omentum:GTEx/v8/Adrenal_Gland:GTEx/v8/Cells_EBV-transformed_lymphocytes:GTEx/v8/Whole_Blood:GTEx/v8/Artery_Aorta:GTEx/v8/Artery_Coronary:GTEx/v8/Artery_Tibial:GTEx/v8/Brain_Amygdala:GTEx/v8/Brain_Anterior_cingulate_cortex_BA24:GTEx/v8/Brain_Caudate_basal_ganglia:GTEx/v8/Brain_Cerebellar_…	+	3e-15	rs2364481	12
Nasal polyps	ENSG00000159352	PSMD4	1	151227179	151239955	1	protein_coding	5710	PSMD4	0.984312	-0.436514	0	0	16	1.36507e-05	0.00169331	GTEx/v8/Brain_Hypothalamus:GTEx/v8/Nerve_Tibial	-	3.41e-06	rs2089081	1
Chronic Diseases of Tonsils and Adenoids	ENSG00000159753	RLTPR	16	67678822	67691472	1	protein_coding	146206	RLTPR	0.0223533	NA	1	23.7	0	NA	NA	NA	NA	2.92e-08	rs117556162	14
Chronic Diseases of Tonsils and Adenoids	ENSG00000160323	ADAMTS13	9	136279478	136324508	1	protein_coding	11093	ADAMTS13	7.88297e-11	-0.276084	0	0	7	4.21278e-06	3.81808e-24	GTEx/v8/Brain_Cerebellum:GTEx/v8/Brain_Nucleus_accumbens_basal_ganglia:GTEx/v8/Skin_Not_Sun_Exposed_Suprapubic	-	5.52e-09	rs633862	11
Chronic Diseases of Tonsils and Adenoids	ENSG00000162426	SLC45A1	1	8377886	8404227	1	protein_coding	50651	SLC45A1	0.0451893	NA	0	0	2	0.000150036	0.00436137	GTEx/v8/Cells_Cultured_fibroblasts	+	2.15e-06	rs12082271	1
Nasal polyps	ENSG00000163131	CTSS	1	150702672	150738433	-1	protein_coding	1520	CTSS	0.628283	-0.390794	26	22.1	220	3.84907e-71	3.09768e-61	GTEx/v8/Adipose_Subcutaneous:GTEx/v8/Adipose_Visceral_Omentum:GTEx/v8/Adrenal_Gland:GTEx/v8/Cells_EBV-transformed_lymphocytes:GTEx/v8/Whole_Blood:GTEx/v8/Artery_Aorta:GTEx/v8/Artery_Coronary:GTEx/v8/Artery_Tibial:GTEx/v8/Brain_Anterior_cingulate_cortex_BA24:GTEx/v8/Brain_Caudate_basal_ganglia:GTEx/v8/Brain_Cerebellar_Hemisphere:GTEx/v8/Brain_Cerebellum:GTEx/v8/Brain_Cortex:GTEx/v8/Brain_Frontal_C…	+	2.17e-10	rs2089081	1
Nasal polyps	ENSG00000163141	BNIPL	1	151009046	151020076	1	protein_coding	149428	BNIPL	1.02796e-09	0.962109	0	0	63	0.000121685	1.73774e-49	GTEx/v8/Thyroid	-	6.15e-05	rs2089081	1
Nasal polyps	ENSG00000163155	LYSMD1	1	151132224	151138424	-1	protein_coding	388695	LYSMD1	0.18195	-0.634867	0	0	71	2.62648e-05	2.38294e-12	GTEx/v8/Nerve_Tibial	-	3.2e-05	rs2089081	1
Infectious and inflammatory respiratory diseases	ENSG00000164039	BDH2	4	104000592	104021040	-1	protein_coding	56898	BDH2	4.05062e-06	-0.183389	0	0	141	1.02593e-22	1.63066e-78	GTEx/v8/Adipose_Subcutaneous:GTEx/v8/Adipose_Visceral_Omentum:GTEx/v8/Whole_Blood:GTEx/v8/Artery_Aorta:GTEx/v8/Artery_Coronary:GTEx/v8/Artery_Tibial:GTEx/v8/Brain_Hypothalamus:GTEx/v8/Breast_Mammary_Tissue:GTEx/v8/Colon_Sigmoid:GTEx/v8/Colon_Transverse:GTEx/v8/Esophagus_Gastroesophageal_Junction:GTEx/v8/Esophagus_Mucosa:GTEx/v8/Esophagus_Muscularis:GTEx/v8/Heart_Atrial_Appendage:GTEx/v8/Heart_Lef…	-	1.45e-09	rs17033015;rs230521;rs4648051	3
Chronic Diseases of Tonsils and Adenoids	ENSG00000164039	BDH2	4	104000592	104021040	-1	protein_coding	56898	BDH2	4.05062e-06	-0.183389	0	0	52	4.82592e-09	1.63066e-78	GTEx/v8/Adipose_Subcutaneous:GTEx/v8/Adipose_Visceral_Omentum:GTEx/v8/Whole_Blood:GTEx/v8/Artery_Coronary:GTEx/v8/Artery_Tibial:GTEx/v8/Breast_Mammary_Tissue:GTEx/v8/Colon_Transverse:GTEx/v8/Esophagus_Mucosa:GTEx/v8/Esophagus_Muscularis:GTEx/v8/Heart_Atrial_Appendage:GTEx/v8/Heart_Left_Ventricle:GTEx/v8/Lung:GTEx/v8/Muscle_Skeletal:GTEx/v8/Nerve_Tibial:GTEx/v8/Skin_Not_Sun_Exposed_Suprapubic:GTEx…	-	5.53e-11	rs4648052	8
Infectious and inflammatory respiratory diseases	ENSG00000164187	LMBRD2	5	36098514	36152063	-1	protein_coding	92255	LMBRD2	0.0145652	-0.933218	0	0	41	9.10988e-07	7.43112e-09	GTEx/v8/Lung	+	2.44e-08	rs7717955	5
Nasal polyps	ENSG00000164398	ACSL6	5	131142683	131347936	-1	protein_coding	23305	ACSL6	0.0885623	-1.29258	2	10.21	139	1.50819e-07	1.11816e-38	GTEx/v8/Whole_Blood:GTEx/v8/Colon_Sigmoid:GTEx/v8/Esophagus_Gastroesophageal_Junction:GTEx/v8/Esophagus_Muscularis:GTEx/v8/Pancreas	+	3.14e-09	rs17132288;rs56399423	5
Nasal polyps	ENSG00000164400	CSF2	5	131409483	131411859	1	protein_coding	1437	CSF2	0.803849	-0.384982	2	3.392	0	NA	NA	NA	NA	1.93e-08	rs56399423;rs17132288	5
Nasal polyps	ENSG00000164402	SEPT8	5	132086509	132142933	-1	protein_coding	23176	SEPT8	0.954286	NA	0	0	34	1.46629e-05	1.96595e-47	GTEx/v8/Skin_Sun_Exposed_Lower_leg	+	9.09e-09	rs56399423;rs17132288	5
Nasal polyps	ENSG00000164403	SHROOM1	5	132157833	132166590	-1	protein_coding	134549	SHROOM1	0.00959555	-0.760291	0	0	24	2.81019e-05	1.05181e-61	GTEx/v8/Whole_Blood	-	3.14e-09	rs56399423;rs17132288	5
Infectious and inflammatory respiratory diseases	ENSG00000165219	GAPVD1	9	128024073	128129486	1	protein_coding	26130	GAPVD1	1	-0.165866	0	0	2	0.000336028	1.81099e-37	GTEx/v8/Thyroid	-	1.44e-08	rs10116520;rs17315546	8
Nasal polyps	ENSG00000165632	TAF3	10	7860467	8058590	1	protein_coding	83860	TAF3	0.995125	-0.956803	0	0	1	9.50659e-05	0.0377166	GTEx/v8/Nerve_Tibial	-	4.3e-07	rs2275806	7
Chronic Diseases of Tonsils and Adenoids	ENSG00000166582	CENPV	17	16245848	16256970	-1	protein_coding	201161	CENPV	0.313328	NA	1	0.886	0	NA	NA	NA	NA	3.92e-08	rs142141461	16
Infectious and inflammatory respiratory diseases	ENSG00000166949	SMAD3	15	67356101	67487533	1	protein_coding	4088	SMAD3	0.868268	-0.0916101	21	22.6	20	5.76036e-30	6.58624e-27	GTEx/v8/Esophagus_Mucosa:GTEx/v8/Thyroid	-	2.63e-08	rs17293632	11
Chronic Diseases of Tonsils and Adenoids	ENSG00000167264	DUS2	16	68021649	68113223	1	protein_coding	54920	DUS2	0.000272032	NA	0	0	8	2.41736e-06	4.18195e-18	GTEx/v8/Artery_Tibial:GTEx/v8/Brain_Nucleus_accumbens_basal_ganglia:GTEx/v8/Cells_Cultured_fibroblasts	+	2.92e-08	rs117556162	14
Nasal polyps	ENSG00000167600	CYP2S1	19	41698954	41713444	1	protein_coding	29785	CYP2S1	0.000914984	-0.0367791	10	9.019	0	NA	NA	NA	NA	1.67e-10	rs338597;rs338593	11
Chronic Diseases of Tonsils and Adenoids	ENSG00000168575	SLC20A2	8	42273993	42397069	-1	protein_coding	6575	SLC20A2	0.86443	-0.217548	15	14.67	18	4.10524e-06	0.000351659	GTEx/v8/Pancreas	+	1.61e-09	rs73631760;rs142125570	10
Infectious and inflammatory respiratory diseases	ENSG00000168671	UGT3A2	5	36035119	36071460	-1	protein_coding	167127	UGT3A2	2.94297e-10	1.24228	0	0	15	7.00154e-05	1.0225e-07	GTEx/v8/Lung	+	3.27e-06	rs7717955	5
Infectious and inflammatory respiratory diseases	ENSG00000168685	IL7R	5	35852797	35879705	1	protein_coding	3575	IL7R	3.72072e-06	1.76705	11	12.84	4	6.83637e-05	0.00151994	GTEx/v8/Esophagus_Muscularis	+	2.44e-08	rs7717955	5
Chronic Diseases of Tonsils and Adenoids	ENSG00000168701	TMEM208	16	67261006	67263181	1	protein_coding	29100	TMEM208	0.424874	-0.539675	0	0	7	6.20019e-06	0.003259	GTEx/v8/Small_Intestine_Terminal_Ileum	-	2.92e-08	rs117556162	14
Infectious and inflammatory respiratory diseases	ENSG00000168769	TET2	4	106067032	106200973	1	protein_coding	54790	TET2	7.05368e-26	-0.493869	21	13.4	34	2.616e-11	1.14771e-07	GTEx/v8/Cells_Cultured_fibroblasts:GTEx/v8/Skin_Sun_Exposed_Lower_leg	-	1.24e-09	rs5860793	4
Chronic Diseases of Tonsils and Adenoids	ENSG00000168769	TET2	4	106067032	106200973	1	protein_coding	54790	TET2	7.05368e-26	-0.493869	21	13.4	62	2.616e-11	1.14771e-07	GTEx/v8/Cells_Cultured_fibroblasts:GTEx/v8/Skin_Sun_Exposed_Lower_leg	-	6.79e-12	rs5860793;rs2647232	9
Nasal polyps	ENSG00000169194	IL13	5	131991955	131996802	1	protein_coding	3596	IL13	0.0257147	0.123554	0	0	25	5.06742e-06	0.00866583	GTEx/v8/Brain_Nucleus_accumbens_basal_ganglia:GTEx/v8/Nerve_Tibial	-	6.12e-09	rs56399423;rs17132288	5
Chronic Diseases of Tonsils and Adenoids	ENSG00000169203	RP11-231C14.4	16	29495010	29517320	-1	protein_coding	NA	NA	NA	NA	0	0	5	3.47039e-07	8.40595e-36	GTEx/v8/Adipose_Subcutaneous:GTEx/v8/Nerve_Tibial:GTEx/v8/Thyroid	+	4.48e-08	rs6565189	13
Chronic Diseases of Tonsils and Adenoids	ENSG00000169217	CD2BP2	16	30362087	30366682	-1	protein_coding	10421	CD2BP2	0.000336174	-1.35975	0	0	1	0.00030504	7.31281e-09	GTEx/v8/Esophagus_Mucosa	+	4.51e-08	rs6565189	13
Nasal polyps	ENSG00000169567	HINT1	5	130494720	130507428	-1	protein_coding	3094	HINT1	0.0842645	-0.379107	0	0	26	5.47708e-05	4.93674e-09	GTEx/v8/Heart_Left_Ventricle:GTEx/v8/Thyroid	+	3.22e-09	rs17132288;rs56399423	5
Chronic Diseases of Tonsils and Adenoids	ENSG00000170425	ADORA2B	17	15848231	15879060	1	protein_coding	136	ADORA2B	2.0075e-05	NA	2	1.353	9	1.0841e-05	9.99176e-116	GTEx/v8/Whole_Blood:GTEx/v8/Cells_Cultured_fibroblasts:GTEx/v8/Thyroid	+	1.74e-08	rs17776585;rs117204737;rs142141461	16
Nasal polyps	ENSG00000170581	STAT2	12	56735381	56753939	-1	protein_coding	6773	STAT2	0.0410947	-0.318375	0	0	4	0.000117721	8.14524e-14	GTEx/v8/Nerve_Tibial	+	2.27e-06	rs705702	9
Chronic rhinosinusitis	ENSG00000170777	TPD52L3	9	6328349	6331900	1	protein_coding	89882	TPD52L3	0.163388	-0.250331	2	9.751	0	NA	NA	NA	NA	2.35e-09	rs17498196	3
Nasal polyps	ENSG00000170777	TPD52L3	9	6328349	6331900	1	protein_coding	89882	TPD52L3	0.163388	-0.250331	2	9.751	0	NA	NA	NA	NA	5.23e-15	rs10975504;rs2381426;rs10975557	6
Chronic Diseases of Tonsils and Adenoids	ENSG00000171102	OBP2B	9	136080664	136084630	-1	protein_coding	29989	OBP2B	0.182973	-0.121399	0	0	27	1.52118e-11	8.2113e-45	GTEx/v8/Skin_Sun_Exposed_Lower_leg	-	4.7e-09	rs576123;rs633862	11
Chronic Diseases of Tonsils and Adenoids	ENSG00000172965	MIR4435-1HG	2	111953927	112252677	-1	lincRNA	541471	MIR4435-1HG	NA	NA	4	3.553	1	2.01286e-23	7.68623e-35	GTEx/v8/Adipose_Subcutaneous:GTEx/v8/Adipose_Visceral_Omentum:GTEx/v8/Whole_Blood:GTEx/v8/Heart_Left_Ventricle:GTEx/v8/Cells_Cultured_fibroblasts:GTEx/v8/Skin_Sun_Exposed_Lower_leg	+	1.8e-11	rs11690849;rs62160676	4
Chronic Diseases of Tonsils and Adenoids	ENSG00000139197	PEX5	12	7341281	7371170	1	protein_coding	5830	PEX5	0.401175	0.0561354	0	0	5	4.0157e-05	0.049	DICE/Monocyte_non_classical	+	1.05e-14	rs2364481	12
Chronic Diseases of Tonsils and Adenoids	ENSG00000175106	TVP23C	17	15341205	15466909	-1	protein_coding	201158	TVP23C	0.000136737	NA	0	0	2	3.04149e-05	3.65084e-32	GTEx/v8/Muscle_Skeletal:GTEx/v8/Skin_Sun_Exposed_Lower_leg	-	2.99e-08	rs17776585	16
Chronic Diseases of Tonsils and Adenoids	ENSG00000159335	PTMS	12	6874682	6880116	1	protein_coding	5763	PTMS	0.778968	NA	0	0	6	7.00734e-06	0.049	DICE/T_CD8_naive	+	1.05e-14	rs2364481	12
Nasal polyps	ENSG00000175643	RMI2	16	11343476	11445619	1	protein_coding	116028	RMI2	0.0246042	0.381612	0	0	101	4.52802e-11	1.00836e-99	GTEx/v8/Esophagus_Muscularis:GTEx/v8/Heart_Atrial_Appendage:GTEx/v8/Nerve_Tibial:GTEx/v8/Skin_Not_Sun_Exposed_Suprapubic:GTEx/v8/Skin_Sun_Exposed_Lower_leg:GTEx/v8/Thyroid	-	3.37e-09	rs12935413;rs34540843;rs11649554	10
Chronic Diseases of Tonsils and Adenoids	ENSG00000175772	LINC01106	2	111132715	111142019	-1	lincRNA	151009	LINC01106	NA	NA	0	0	2	0.000151985	0.0474419	GTEx/v8/Cells_Cultured_fibroblasts	+	4.8e-08	rs11690849	4
Nasal polyps	ENSG00000176422	SPRYD4	12	56862301	56864763	1	protein_coding	283377	SPRYD4	0.000589212	-0.887332	0	0	22	3.94548e-05	0.000748333	GTEx/v8/Thyroid	+	3.67e-08	rs705702	9
Chronic Diseases of Tonsils and Adenoids	ENSG00000176635	HORMAD2	22	30476163	30573064	1	protein_coding	150280	HORMAD2	3.4485e-05	-0.524289	59	15.86	4	5.62096e-06	0.0031373	GTEx/v8/Adipose_Subcutaneous	+	2.45e-18	rs10707434;rs131291;rs73162731;rs713875;rs41174;rs9608832	20
Diseases of Pulp and Periapical Tissues	ENSG00000176635	HORMAD2	22	30476163	30573064	1	protein_coding	150280	HORMAD2	3.4485e-05	-0.524289	15	12.74	0	NA	NA	NA	NA	8.37e-10	rs9614155	1
Chronic rhinosinusitis	ENSG00000176909	MAMSTR	19	49215999	49222978	-1	protein_coding	284358	MAMSTR	0.00123326	-0.0520318	8	17.88	52	7.86033e-26	2.98816e-20	GTEx/v8/Adrenal_Gland:GTEx/v8/Artery_Tibial:GTEx/v8/Brain_Anterior_cingulate_cortex_BA24:GTEx/v8/Brain_Caudate_basal_ganglia:GTEx/v8/Brain_Cerebellum:GTEx/v8/Brain_Cortex:GTEx/v8/Brain_Frontal_Cortex_BA9:GTEx/v8/Brain_Hippocampus:GTEx/v8/Brain_Hypothalamus:GTEx/v8/Brain_Nucleus_accumbens_basal_ganglia:GTEx/v8/Brain_Putamen_basal_ganglia:GTEx/v8/Colon_Sigmoid:GTEx/v8/Esophagus_Gastroesophageal_Jun…	+	2.49e-08	rs281379	5
Chronic rhinosinusitis	ENSG00000176920	FUT2	19	49199228	49209207	1	protein_coding	2524	FUT2	5.46581e-12	4.20043	32	52	52	1.778e-159	1.50287e-145	GTEx/v8/Brain_Anterior_cingulate_cortex_BA24:GTEx/v8/Brain_Caudate_basal_ganglia:GTEx/v8/Brain_Hippocampus:GTEx/v8/Brain_Nucleus_accumbens_basal_ganglia:GTEx/v8/Brain_Putamen_basal_ganglia:GTEx/v8/Breast_Mammary_Tissue:GTEx/v8/Colon_Transverse:GTEx/v8/Esophagus_Mucosa:GTEx/v8/Heart_Atrial_Appendage:GTEx/v8/Heart_Left_Ventricle:GTEx/v8/Lung:GTEx/v8/Pancreas:GTEx/v8/Pituitary:GTEx/v8/Minor_Salivary…	-	2.49e-08	rs281379	5
Chronic Diseases of Tonsils and Adenoids	ENSG00000178226	PRSS36	16	31150246	31161415	-1	protein_coding	146547	PRSS36	4.42359e-13	-0.151363	0	0	2	8.75958e-05	5.26473e-07	GTEx/v8/Artery_Tibial	-	0.00011	rs6565189	13
Infectious and inflammatory respiratory diseases	ENSG00000178445	GLDC	9	6532464	6645650	-1	protein_coding	2731	GLDC	4.87945e-14	0.293403	0	0	2	2.93758e-05	4.29881e-95	GTEx/v8/Lung:GTEx/v8/Thyroid	-	5.49e-10	rs72699186;rs2095044	7
Vasomotor and Allergic rhinitis	ENSG00000178445	GLDC	9	6532464	6645650	-1	protein_coding	2731	GLDC	4.87945e-14	0.293403	0	0	1	7.00473e-05	4.29881e-95	GTEx/v8/Thyroid	-	3.44e-08	rs2381416	3
Chronic rhinosinusitis	ENSG00000178445	GLDC	9	6532464	6645650	-1	protein_coding	2731	GLDC	4.87945e-14	0.293403	1	0.247	2	2.93758e-05	4.29881e-95	GTEx/v8/Lung:GTEx/v8/Thyroid	-	2.65e-15	rs17498196;rs10975479;rs11506294;rs2095044	3
Nasal polyps	ENSG00000178445	GLDC	9	6532464	6645650	-1	protein_coding	2731	GLDC	4.87945e-14	0.293403	2	0.247	3	1.79522e-12	4.29881e-95	GTEx/v8/Lung:GTEx/v8/Thyroid	-	3.7e-35	rs10975504;rs10975660;rs10975479;rs11506294;rs2095044	6
Infectious and inflammatory respiratory diseases	ENSG00000178951	ZBTB7A	19	4044362	4066943	-1	protein_coding	51341	ZBTB7A	NA	NA	6	21.7	9	6.53982e-12	4.0952e-08	GTEx/v8/Whole_Blood:GTEx/v8/Esophagus_Mucosa:GTEx/v8/Thyroid	-	2.29e-08	rs74178437	13
Chronic Diseases of Tonsils and Adenoids	ENSG00000178951	ZBTB7A	19	4044362	4066943	-1	protein_coding	51341	ZBTB7A	NA	NA	6	21.7	9	6.53982e-12	4.0952e-08	GTEx/v8/Whole_Blood:GTEx/v8/Esophagus_Mucosa:GTEx/v8/Thyroid	-	1.1e-08	rs74178437	18
Vasomotor and Allergic rhinitis	ENSG00000179240	RP11-111M22.2	11	76092357	76125663	1	protein_coding	100506127	GVQW3	NA	NA	0	0	2	0.000139485	1.13841e-92	GTEx/v8/Thyroid	+	2.58e-08	rs7936434	5
Chronic Diseases of Tonsils and Adenoids	ENSG00000179277	MEIS3P1	17	15689932	15690889	1	pseudogene	4213	MEIS3P1	NA	NA	0	0	2	1.30493e-05	8.07386e-28	GTEx/v8/Breast_Mammary_Tissue:GTEx/v8/Nerve_Tibial:GTEx/v8/Skin_Sun_Exposed_Lower_leg	-	4.32e-07	rs17776585	16
Chronic Diseases of Tonsils and Adenoids	ENSG00000180035	ZNF48	16	30389427	30411429	1	protein_coding	197407	ZNF48	0.0324251	NA	0	0	3	2.99753e-05	0.024742	GTEx/v8/Pituitary	-	4.48e-08	rs6565189	13
Chronic Diseases of Tonsils and Adenoids	ENSG00000180096	SEPT1	16	30389454	30407312	-1	protein_coding	1731	SEPT1	0.00293747	NA	0	0	5	1.27742e-09	9.51604e-31	GTEx/v8/Adipose_Subcutaneous:GTEx/v8/Artery_Aorta:GTEx/v8/Artery_Tibial:GTEx/v8/Brain_Nucleus_accumbens_basal_ganglia:GTEx/v8/Brain_Putamen_basal_ganglia:GTEx/v8/Esophagus_Gastroesophageal_Junction:GTEx/v8/Esophagus_Muscularis:GTEx/v8/Nerve_Tibial:GTEx/v8/Cells_Cultured_fibroblasts:GTEx/v8/Skin_Not_Sun_Exposed_Suprapubic:GTEx/v8/Skin_Sun_Exposed_Lower_leg	-	4.48e-08	rs6565189	13
Infectious and inflammatory respiratory diseases	ENSG00000180251	SLC9A4	2	103089762	103150431	1	protein_coding	389015	SLC9A4	1.58073e-06	1.34927	5	2.296	0	NA	NA	NA	NA	1.79e-06	rs950881	1
Vasomotor and Allergic rhinitis	ENSG00000180251	SLC9A4	2	103089762	103150431	1	protein_coding	389015	SLC9A4	1.58073e-06	1.34927	3	2.296	0	NA	NA	NA	NA	7.29e-08	rs11690644	1
Chronic rhinosinusitis	ENSG00000180251	SLC9A4	2	103089762	103150431	1	protein_coding	389015	SLC9A4	1.58073e-06	1.34927	5	2.296	0	NA	NA	NA	NA	5.4e-07	rs72823677	1
Nasal polyps	ENSG00000180251	SLC9A4	2	103089762	103150431	1	protein_coding	389015	SLC9A4	1.58073e-06	1.34927	5	14.69	2	3.57511e-05	2.62577e-06	GTEx/v8/Esophagus_Mucosa	+	7.5e-13	rs56117144;rs11688802	2
Infectious and inflammatory respiratory diseases	ENSG00000180264	GPR144	9	127213423	127239379	1	protein_coding	347088	GPR144	0.315055	0.0636392	0	0	50	9.707e-07	2.6186e-11	GTEx/v8/Brain_Cerebellum	-	4.69e-09	rs10116520;rs17315546;rs3758213	8
Vasomotor and Allergic rhinitis	ENSG00000180264	GPR144	9	127213423	127239379	1	protein_coding	347088	GPR144	0.315055	0.0636392	0	0	1	0.000124527	2.6186e-11	GTEx/v8/Brain_Cerebellum	-	6.81e-07	rs3758213	4
Chronic rhinosinusitis	ENSG00000182264	IZUMO1	19	49244109	49250166	-1	protein_coding	284359	IZUMO1	0.00241626	0.753533	1	3.43	52	4.52089e-21	1.59306e-44	GTEx/v8/Adipose_Subcutaneous:GTEx/v8/Adipose_Visceral_Omentum:GTEx/v8/Adrenal_Gland:GTEx/v8/Breast_Mammary_Tissue:GTEx/v8/Colon_Sigmoid:GTEx/v8/Esophagus_Gastroesophageal_Junction:GTEx/v8/Esophagus_Mucosa:GTEx/v8/Heart_Atrial_Appendage:GTEx/v8/Heart_Left_Ventricle:GTEx/v8/Lung:GTEx/v8/Muscle_Skeletal:GTEx/v8/Nerve_Tibial:GTEx/v8/Pancreas:GTEx/v8/Prostate:GTEx/v8/Skin_Not_Sun_Exposed_Suprapubic:GT…	+	2.49e-08	rs281379	5
Nasal polyps	ENSG00000183354	KIAA2026	9	5881596	6007901	-1	protein_coding	158358	KIAA2026	NA	NA	5	8.876	0	NA	NA	NA	NA	1.61e-13	rs142620647	6
Chronic Diseases of Tonsils and Adenoids	ENSG00000183597	TANGO2	22	20004537	20053449	1	protein_coding	128989	TANGO2	4.22238e-06	0.890582	0	0	13	7.48085e-08	4.86955e-13	GTEx/v8/Thyroid	-	2.39e-09	rs78426131	19
Chronic Diseases of Tonsils and Adenoids	ENSG00000183604	RP11-347C12.2	16	30234230	30346695	-1	pseudogene	595101	SMG1P5	NA	NA	0	0	3	7.46523e-06	4.9021e-49	GTEx/v8/Adipose_Subcutaneous:GTEx/v8/Skin_Sun_Exposed_Lower_leg	-	4.48e-08	rs6565189	13
Chronic Diseases of Tonsils and Adenoids	ENSG00000184076	UQCR10	22	30163358	30166402	1	protein_coding	29796	UQCR10	0.149717	0.0389739	1	9.825	178	4.67082e-07	4.44993e-11	GTEx/v8/Adipose_Subcutaneous:GTEx/v8/Whole_Blood:GTEx/v8/Heart_Left_Ventricle:GTEx/v8/Skin_Not_Sun_Exposed_Suprapubic:GTEx/v8/Skin_Sun_Exposed_Lower_leg:GTEx/v8/Thyroid	+	1.77e-18	rs10707434;rs2857633;rs131291;rs5763378;rs41174;rs73162731;rs9608832;rs713875;rs2074204	20
Diseases of Pulp and Periapical Tissues	ENSG00000184076	UQCR10	22	30163358	30166402	1	protein_coding	29796	UQCR10	0.149717	0.0389739	0	0	5	3.36357e-06	4.44993e-11	GTEx/v8/Skin_Not_Sun_Exposed_Suprapubic:GTEx/v8/Skin_Sun_Exposed_Lower_leg	+	1.02e-07	rs9614155	1
Chronic Diseases of Tonsils and Adenoids	ENSG00000100285	NEFH	22	29876219	29887379	1	protein_coding	4744	NEFH	0.00126104	-0.289745	0	0	49	4.94423e-07	1.10064e-12	DICE/Monocyte_non_classical:GTEx/v8/Adipose_Subcutaneous:GTEx/v8/Whole_Blood:GTEx/v8/Muscle_Skeletal:GTEx/v8/Nerve_Tibial:GTEx/v8/Skin_Not_Sun_Exposed_Suprapubic:GTEx/v8/Spleen	+	7.73e-10	rs6006220;rs5763378;rs2857633	20
Nasal polyps	ENSG00000185338	SOCS1	16	11348262	11350036	-1	protein_coding	8651	SOCS1	0.541776	NA	0	0	55	1.82624e-06	0.0161114	GTEx/v8/Cells_EBV-transformed_lymphocytes:GTEx/v8/Artery_Aorta	+	3.37e-09	rs34540843;rs12935413	10
Chronic Diseases of Tonsils and Adenoids	ENSG00000185340	GAS2L1	22	29702572	29708774	1	protein_coding	10634	GAS2L1	0.70043	NA	0	0	17	3.20271e-06	1.18808e-59	GTEx/v8/Brain_Caudate_basal_ganglia:GTEx/v8/Nerve_Tibial:GTEx/v8/Cells_Cultured_fibroblasts	+	4.62e-08	rs6006220;rs5763378	20
Nasal polyps	ENSG00000185664	PMEL	12	56347889	56367101	-1	protein_coding	6490	PMEL	1.12363e-07	0.0288627	0	0	4	1.28908e-05	1.60238e-38	GTEx/v8/Adipose_Subcutaneous	+	3.99e-06	rs705702	9
Chronic Diseases of Tonsils and Adenoids	ENSG00000186575	NF2	22	29999545	30094587	1	protein_coding	4771	NF2	0.999923	0.150793	29	12.26	174	4.85206e-16	6.82261e-12	GTEx/v8/Adipose_Subcutaneous:GTEx/v8/Artery_Aorta:GTEx/v8/Artery_Tibial:GTEx/v8/Esophagus_Mucosa:GTEx/v8/Esophagus_Muscularis:GTEx/v8/Nerve_Tibial:GTEx/v8/Cells_Cultured_fibroblasts	-	1.73e-13	rs5763378;rs2857633;rs6006220;rs9608832;rs10707434;rs131291;rs2074204	20
Vasomotor and Allergic rhinitis	ENSG00000186952	TMEM232	5	109624934	110074657	-1	protein_coding	642987	TMEM232	NA	0.361148	0	0	2	0.000150694	6.12396e-29	GTEx/v8/Thyroid	+	9.67e-09	rs62375554	2
Chronic rhinosinusitis	ENSG00000186952	TMEM232	5	109624934	110074657	-1	protein_coding	642987	TMEM232	NA	0.361148	0	0	2	0.000150694	6.12396e-29	GTEx/v8/Thyroid	+	3.07e-10	rs62375554	2
Chronic Diseases of Tonsils and Adenoids	ENSG00000187860	CCDC157	22	30752624	30774647	1	protein_coding	550631	CCDC157	2.42416e-15	-0.484095	0	0	4	0.000119113	5.01715e-11	GTEx/v8/Heart_Left_Ventricle	-	6.72e-08	rs9608832	20
Chronic Diseases of Tonsils and Adenoids	ENSG00000188263	IL17REL	22	50432942	50451088	-1	protein_coding	400935	IL17REL	0.327459	-1.30545	3	7.084	0	NA	NA	NA	NA	1.33e-08	rs12171069	21
Nasal polyps	ENSG00000196465	MYL6B	12	56546040	56553431	1	protein_coding	140465	MYL6B	0.00373381	-0.586633	0	0	3	2.71914e-05	6.64007e-10	GTEx/v8/Skin_Sun_Exposed_Lower_leg	-	2.27e-06	rs705702	9
Nasal polyps	ENSG00000197208	SLC22A4	5	131630136	131679899	1	protein_coding	6583	SLC22A4	4.64079e-06	-0.515619	4	9.392	136	2.73168e-10	1.31287e-10	GTEx/v8/Whole_Blood:GTEx/v8/Artery_Aorta:GTEx/v8/Brain_Cerebellum:GTEx/v8/Colon_Transverse:GTEx/v8/Muscle_Skeletal:GTEx/v8/Cells_Cultured_fibroblasts:GTEx/v8/Skin_Sun_Exposed_Lower_leg:GTEx/v8/Thyroid	+	3.14e-09	rs56399423;rs17132288	5
Nasal polyps	ENSG00000197308	GATA3-AS1	10	8092413	8095447	-1	lincRNA	399717	GATA3-AS1	NA	NA	1	13.12	34	4.50281e-46	2.06218e-36	GTEx/v8/Cells_Cultured_fibroblasts	-	1.05e-13	rs2275806;rs1775551;rs962993	07:08:00
Nasal polyps	ENSG00000197375	SLC22A5	5	131705444	131731306	1	protein_coding	6584	SLC22A5	4.9e-09	0.858089	8	10.46	138	4.81773e-65	8.62292e-57	DICE/B_cell_naive:DICE/T_CD4_naive:DICE/T_CD4_naive_activated:DICE/T_CD8_naive:DICE/T_CD8_naive_activated:DICE/Monocyte_classical:DICE/Monocyte_non_classical:DICE/NK:DICE/T_CD4_TFH:DICE/T_CD4_TH1:DICE/T_CD4_TH17:DICE/T_CD4_TH1_17:DICE/T_CD4_TH2:DICE/T_CD4_memory_TREG:DICE/T_CD4_naive_TREG:GTEx/v8/Adipose_Subcutaneous:GTEx/v8/Adipose_Visceral_Omentum:GTEx/v8/Cells_EBV-transformed_lymphocytes:GTEx/…	+	3.14e-09	rs56399423;rs17132288	5
Nasal polyps	ENSG00000197536	C5orf56	5	131746328	131811736	1	protein_coding	441108	C5orf56	0.107649	NA	18	9.904	131	9.72465e-13	3.3657e-48	GTEx/v8/Adipose_Subcutaneous:GTEx/v8/Whole_Blood:GTEx/v8/Artery_Aorta:GTEx/v8/Artery_Tibial:GTEx/v8/Brain_Caudate_basal_ganglia:GTEx/v8/Brain_Cerebellar_Hemisphere:GTEx/v8/Brain_Cerebellum:GTEx/v8/Brain_Cortex:GTEx/v8/Brain_Frontal_Cortex_BA9:GTEx/v8/Brain_Hippocampus:GTEx/v8/Brain_Hypothalamus:GTEx/v8/Brain_Nucleus_accumbens_basal_ganglia:GTEx/v8/Esophagus_Gastroesophageal_Junction:GTEx/v8/Esoph…	-	3.14e-09	rs56399423;rs17132288	5
Nasal polyps	ENSG00000197622	CDC42SE1	1	151023447	151042801	-1	protein_coding	56882	CDC42SE1	0.0135195	-0.166256	0	0	1	0.000293509	8.60996e-15	GTEx/v8/Skin_Not_Sun_Exposed_Suprapubic	+	2.05e-08	rs2089081	1
Nasal polyps	ENSG00000197646	PDCD1LG2	9	5510545	5571282	1	protein_coding	80380	PDCD1LG2	0.000429826	0.0544808	0	0	6	8.1102e-08	7.23683e-27	GTEx/v8/Nerve_Tibial:GTEx/v8/Thyroid	+	1.61e-13	rs142620647	6
Nasal polyps	ENSG00000197728	RPS26	12	56435637	56438116	1	protein_coding	6231	RPS26	0.753343	-0.144336	1	7.88	42	1.15913e-298	2.20772e-265	DICE/T_CD4_naive_activated:DICE/T_CD8_naive_activated:GTEx/v8/Adipose_Subcutaneous:GTEx/v8/Adipose_Visceral_Omentum:GTEx/v8/Adrenal_Gland:GTEx/v8/Cells_EBV-transformed_lymphocytes:GTEx/v8/Whole_Blood:GTEx/v8/Artery_Aorta:GTEx/v8/Artery_Coronary:GTEx/v8/Artery_Tibial:GTEx/v8/Brain_Amygdala:GTEx/v8/Brain_Anterior_cingulate_cortex_BA24:GTEx/v8/Brain_Caudate_basal_ganglia:GTEx/v8/Brain_Cerebellar_Hem…	+	3.67e-08	rs705702	9
Chronic Diseases of Tonsils and Adenoids	ENSG00000198355	PIM3	22	50354161	50357728	1	protein_coding	415116	PIM3	0.937121	NA	0	0	3	1.26572e-10	9.83661e-20	GTEx/v8/Adipose_Subcutaneous:GTEx/v8/Whole_Blood:GTEx/v8/Cells_Cultured_fibroblasts	+	1.33e-08	rs12171069	21
Chronic Diseases of Tonsils and Adenoids	ENSG00000198832	SELM	22	31500758	31516055	-1	protein_coding	140606	SELENOM	6.37196e-07	NA	0	0	1	0.000321393	3.12074e-06	GTEx/v8/Cells_Cultured_fibroblasts	+	4.93e-10	rs16988423	20
Chronic Diseases of Tonsils and Adenoids	ENSG00000200975	RNU1-7P	1	8266494	8266657	-1	snRNA	106481952	RNU1-7P	NA	NA	2	3.848	0	NA	NA	NA	NA	2.29e-06	rs12082271	1
Chronic Diseases of Tonsils and Adenoids	ENSG00000100296	THOC5	22	29901868	29951205	-1	protein_coding	8563	THOC5	0.000462815	1.61267	8	5.533	126	2.82323e-09	9.19951e-146	DICE/Monocyte_classical:GTEx/v8/Adipose_Subcutaneous:GTEx/v8/Adipose_Visceral_Omentum:GTEx/v8/Artery_Aorta:GTEx/v8/Artery_Tibial:GTEx/v8/Breast_Mammary_Tissue:GTEx/v8/Colon_Sigmoid:GTEx/v8/Colon_Transverse:GTEx/v8/Esophagus_Gastroesophageal_Junction:GTEx/v8/Esophagus_Mucosa:GTEx/v8/Esophagus_Muscularis:GTEx/v8/Heart_Left_Ventricle:GTEx/v8/Lung:GTEx/v8/Muscle_Skeletal:GTEx/v8/Nerve_Tibial:GTEx/v8/…	+	3.27e-15	rs5763378;rs6006220;rs2857633;rs73162731;rs2074204;rs41174;rs713875;rs10707434	20
Chronic Diseases of Tonsils and Adenoids	ENSG00000100325	ASCC2	22	30184597	30234271	-1	protein_coding	84164	ASCC2	0.178385	-0.345582	18	8.066	197	6.65547e-08	1.66232e-09	GTEx/v8/Cells_EBV-transformed_lymphocytes:GTEx/v8/Whole_Blood:GTEx/v8/Brain_Cerebellar_Hemisphere:GTEx/v8/Brain_Cerebellum:GTEx/v8/Muscle_Skeletal:GTEx/v8/Nerve_Tibial:GTEx/v8/Cells_Cultured_fibroblasts:GTEx/v8/Thyroid	-	1.24e-19	rs10707434;rs131291;rs9608832;rs73162731;rs41174;rs713875;rs2074204;rs2857633	20
Nasal polyps	ENSG00000203804	ADAMTSL4-AS1	1	150533480	150533969	-1	protein_coding	574406	ADAMTSL4-AS1	NA	NA	0	0	184	1.303e-06	0.00108107	GTEx/v8/Brain_Cerebellum:GTEx/v8/Esophagus_Mucosa:GTEx/v8/Heart_Atrial_Appendage:GTEx/v8/Heart_Left_Ventricle:GTEx/v8/Liver:GTEx/v8/Lung:GTEx/v8/Prostate:GTEx/v8/Skin_Sun_Exposed_Lower_leg	+	2.17e-10	rs2089081	1
Nasal polyps	ENSG00000203814	HIST2H2BF	1	149754245	149783928	-1	protein_coding	440689	HIST2H2BF	0.026	-0.101156	0	0	9	2.46995e-05	0.0379747	GTEx/v8/Small_Intestine_Terminal_Ileum	-	0.000214	rs2089081	1
Chronic Diseases of Tonsils and Adenoids	ENSG00000204186	ZDBF2	2	207139387	207179148	1	protein_coding	57683	ZDBF2	1.37874e-07	-0.145117	0	0	1	4.34173e-05	0.0187491	GTEx/v8/Skin_Sun_Exposed_Lower_leg	+	2.26e-08	rs56848317	6
Infectious and inflammatory respiratory diseases	ENSG00000205716	AC007248.6	2	102866317	102866715	-1	pseudogene	NA	NA	NA	NA	2	7.299	0	NA	NA	NA	NA	1.46e-06	rs950881	1
Vasomotor and Allergic rhinitis	ENSG00000205716	AC007248.6	2	102866317	102866715	-1	pseudogene	NA	NA	NA	NA	2	7.299	0	NA	NA	NA	NA	2.26e-08	rs11690644	1
Chronic rhinosinusitis	ENSG00000205716	AC007248.6	2	102866317	102866715	-1	pseudogene	NA	NA	NA	NA	1	5.06	0	NA	NA	NA	NA	2.17e-06	rs72823677	1
Nasal polyps	ENSG00000205716	AC007248.6	2	102866317	102866715	-1	pseudogene	NA	NA	NA	NA	0	0	28	3.45825e-06	0.00396834	GTEx/v8/Whole_Blood	-	2.93e-12	rs56117144;rs13020553;rs141508079	2
Infectious and inflammatory respiratory diseases	ENSG00000212283	SNORD89	2	101889398	101889511	-1	snoRNA	692205	SNORD89	NA	NA	0	0	5	2.03765e-05	2.57849e-10	GTEx/v8/Brain_Anterior_cingulate_cortex_BA24	+	3.33e-05	rs950881	1
Vasomotor and Allergic rhinitis	ENSG00000212283	SNORD89	2	101889398	101889511	-1	snoRNA	692205	SNORD89	NA	NA	0	0	5	2.03765e-05	2.57849e-10	GTEx/v8/Brain_Anterior_cingulate_cortex_BA24	+	2.98e-06	rs11690644	1
Peritonsillar Abscess	ENSG00000214407	RP11-221J22.1	3	101659703	101716770	1	lincRNA	152225	LINC02085	NA	NA	2	9.161	0	NA	NA	NA	NA	9.36e-09	rs1456200	1
Chronic Diseases of Tonsils and Adenoids	ENSG00000214491	SEC14L6	22	30918786	30942669	-1	protein_coding	730005	SEC14L6	0.0459162	0.383964	0	0	12	2.57309e-05	0.00714709	GTEx/v8/Brain_Spinal_cord_cervical_c-1	-	1.77e-18	rs713875	20
Vasomotor and Allergic rhinitis	ENSG00000214784	AC010468.1	5	110527924	110528740	-1	pseudogene	NA	NA	NA	NA	2	3.45	0	NA	NA	NA	NA	2.07e-08	rs72793573	2
Chronic rhinosinusitis	ENSG00000214784	AC010468.1	5	110527924	110528740	-1	pseudogene	NA	NA	NA	NA	1	0.889	0	NA	NA	NA	NA	2.89e-10	rs76591266	2
Nasal polyps	ENSG00000214784	AC010468.1	5	110527924	110528740	-1	pseudogene	NA	NA	NA	NA	3	3.45	8	2.64437e-05	0.041387	GTEx/v8/Heart_Left_Ventricle	-	1.6e-10	rs457734;rs56858603	4
Chronic Diseases of Tonsils and Adenoids	ENSG00000214946	TBC1D26	17	15635561	15649476	1	protein_coding	353149	TBC1D26	0.861487	0.479043	0	0	1	2.79861e-05	0.00565921	GTEx/v8/Lung	+	2.99e-08	rs17776585	16
Nasal polyps	ENSG00000217128	FNIP1	5	130977407	131132710	-1	protein_coding	96459	FNIP1	0.999819	-0.514581	3	10.64	0	NA	NA	NA	NA	1.2e-08	rs17132288	5
Chronic rhinosinusitis	ENSG00000221916	C19orf73	19	49621655	49622397	-1	protein_coding	55150	C19orf73	0.484013	NA	0	0	1	2.87644e-05	0.049	DICE/T_CD4_TH17	+	0.00024	rs281379	5
Infectious and inflammatory respiratory diseases	ENSG00000221955	SLC12A8	3	124801480	124998021	-1	protein_coding	84561	SLC12A8	7.93459e-13	1.16845	6	8.401	3	1.33842e-09	2.67417e-38	GTEx/v8/Liver	+	1.52e-08	rs1980080	2
Chronic Diseases of Tonsils and Adenoids	ENSG00000221955	SLC12A8	3	124801480	124998021	-1	protein_coding	84561	SLC12A8	7.93459e-13	1.16845	6	8.401	3	1.33842e-09	2.67417e-38	GTEx/v8/Liver	+	9.37e-09	rs1980080	7
Peritonsillar Abscess	ENSG00000221955	SLC12A8	3	124801480	124998021	-1	protein_coding	84561	SLC12A8	7.93459e-13	1.16845	7	5.565	4	1.33842e-09	2.67417e-38	GTEx/v8/Liver	+	9.15e-11	rs816340	2
Nasal polyps	ENSG00000223548	AC034228.3	5	131339285	131342715	1	antisense	NA	NA	NA	NA	2	3.659	0	NA	NA	NA	NA	5.27e-09	rs17132288	5
Chronic Diseases of Tonsils and Adenoids	ENSG00000223878	AC005517.3	17	15410180	15410668	1	pseudogene	NA	NA	NA	NA	0	0	1	0.000111296	7.88725e-32	GTEx/v8/Skin_Not_Sun_Exposed_Suprapubic	-	4.32e-07	rs17776585	16
Nasal polyps	ENSG00000224015	AC063976.3	5	131514927	131516821	-1	lincRNA	NA	NA	NA	NA	1	8.97	0	NA	NA	NA	NA	0.000217	rs17132288	5
Infectious and inflammatory respiratory diseases	ENSG00000224020	MIR181A2HG	9	127420746	127460910	1	antisense	100379345	MIR181A2HG	NA	NA	0	0	1	4.29419e-05	0.0490579	GTEx/v8/Esophagus_Gastroesophageal_Junction	-	3.14e-08	rs3758213	8
Vasomotor and Allergic rhinitis	ENSG00000224020	MIR181A2HG	9	127420746	127460910	1	antisense	100379345	MIR181A2HG	NA	NA	0	0	1	4.29419e-05	0.0490579	GTEx/v8/Esophagus_Gastroesophageal_Junction	-	2.49e-06	rs3758213	4
Infectious and inflammatory respiratory diseases	ENSG00000120211	INSL4	9	5231419	5235304	1	protein_coding	3641	INSL4	2.05846e-05	0.67711	0	0	1	2.6117e-05	0.049	DICE/T_CD4_memory_TREG	-	3.34e-10	rs2095044	7
Chronic Diseases of Tonsils and Adenoids	ENSG00000128342	LIF	22	30636436	30642840	-1	protein_coding	3976	LIF	0.774442	-0.0229727	0	0	148	1.75145e-07	2.3367e-11	DICE/NK:GTEx/v8/Whole_Blood:GTEx/v8/Artery_Tibial:GTEx/v8/Colon_Sigmoid:GTEx/v8/Muscle_Skeletal:GTEx/v8/Nerve_Tibial:GTEx/v8/Skin_Sun_Exposed_Lower_leg	-	1.24e-19	rs10707434;rs713875;rs131291;rs41174;rs2857633;rs5763378;rs2074204	20
Nasal polyps	ENSG00000224431	AC063976.7	5	131535149	131539180	1	pseudogene	NA	NA	NA	NA	2	13.16	137	3.42816e-15	3.19327e-11	GTEx/v8/Adipose_Subcutaneous:GTEx/v8/Adipose_Visceral_Omentum:GTEx/v8/Brain_Cerebellum:GTEx/v8/Nerve_Tibial:GTEx/v8/Ovary:GTEx/v8/Skin_Not_Sun_Exposed_Suprapubic:GTEx/v8/Thyroid	-	3.14e-09	rs17132288;rs56399423	5
Nasal polyps	ENSG00000224800	RP11-235D19.2	1	150853712	150854159	-1	pseudogene	NA	NA	NA	NA	0	0	131	3.02793e-06	0.00252646	GTEx/v8/Adipose_Subcutaneous:GTEx/v8/Nerve_Tibial	-	8.21e-10	rs2089081	1
Chronic Diseases of Tonsils and Adenoids	ENSG00000224959	AC017002.2	2	112249520	112252388	-1	lincRNA	NA	NA	NA	NA	0	0	1	1.32506e-06	9.31348e-05	GTEx/v8/Cells_Cultured_fibroblasts	+	1.8e-11	rs62160676	4
Chronic Diseases of Tonsils and Adenoids	ENSG00000225465	RFPL1S	22	29832818	29874164	-1	antisense	10740	RFPL1S	NA	NA	0	0	82	6.39909e-07	0.000401601	GTEx/v8/Cells_Cultured_fibroblasts:GTEx/v8/Spleen	+	3.27e-15	rs10707434;rs2857633;rs131291;rs6006220	20
Nasal polyps	ENSG00000225556	C2CD4D	1	151810295	151813033	-1	protein_coding	100191040	C2CD4D	NA	0.0955645	0	0	5	6.64238e-05	1.97117e-05	GTEx/v8/Artery_Tibial:GTEx/v8/Skin_Sun_Exposed_Lower_leg	-	2.05e-08	rs2089081	1
Chronic Diseases of Tonsils and Adenoids	ENSG00000225676	RP3-438O4.4	22	30580633	30603098	-1	antisense	NA	NA	NA	NA	8	12.5	0	NA	NA	NA	NA	1.24e-19	rs10707434;rs131291;rs73162731;rs713875	20
Diseases of Pulp and Periapical Tissues	ENSG00000225676	RP3-438O4.4	22	30580633	30603098	-1	antisense	NA	NA	NA	NA	1	1.384	0	NA	NA	NA	NA	6.51e-10	rs9614155	1
Chronic Diseases of Tonsils and Adenoids	ENSG00000225971	CTA-85E5.6	22	30532662	30533670	-1	pseudogene	NA	NA	NA	NA	1	12.91	0	NA	NA	NA	NA	1.4e-11	rs73162731	20
Diseases of Pulp and Periapical Tissues	ENSG00000225971	CTA-85E5.6	22	30532662	30533670	-1	pseudogene	NA	NA	NA	NA	1	12.91	0	NA	NA	NA	NA	8.98e-10	rs9614155	1
Chronic Diseases of Tonsils and Adenoids	ENSG00000226471	CTA-292E10.6	22	29196671	29244547	1	antisense	NA	NA	NA	NA	0	0	8	0.000168922	3.95557e-05	GTEx/v8/Cells_Cultured_fibroblasts	-	1.34e-12	rs10707434;rs2857633;rs131291	20
Chronic Diseases of Tonsils and Adenoids	ENSG00000227117	CTA-85E5.10	22	30404731	30476469	-1	antisense	NA	NA	NA	NA	43	17.92	24	4.74703e-06	5.06501e-11	GTEx/v8/Adipose_Subcutaneous:GTEx/v8/Brain_Caudate_basal_ganglia:GTEx/v8/Breast_Mammary_Tissue	-	1.24e-19	rs10707434;rs131291;rs73162731;rs9608832;rs41174;rs713875;rs2074204	20
Diseases of Pulp and Periapical Tissues	ENSG00000227117	CTA-85E5.10	22	30404731	30476469	-1	antisense	NA	NA	NA	NA	11	17.92	0	NA	NA	NA	NA	8.17e-10	rs9614155	1
Infectious and inflammatory respiratory diseases	ENSG00000227200	RP11-121A14.3	9	127025155	127028088	1	sense_intronic	NA	NA	NA	NA	4	7.001	0	NA	NA	NA	NA	1.04e-06	rs10116520	8
Chronic Diseases of Tonsils and Adenoids	ENSG00000184117	NIPSNAP1	22	29950797	29977326	-1	protein_coding	8508	NIPSNAP1	0.979279	0.250689	8	10.32	208	8.60434e-18	5.37023e-40	DICE/T_CD4_TH1_17:GTEx/v8/Adipose_Subcutaneous:GTEx/v8/Adipose_Visceral_Omentum:GTEx/v8/Adrenal_Gland:GTEx/v8/Cells_EBV-transformed_lymphocytes:GTEx/v8/Artery_Aorta:GTEx/v8/Artery_Coronary:GTEx/v8/Artery_Tibial:GTEx/v8/Brain_Caudate_basal_ganglia:GTEx/v8/Brain_Cerebellar_Hemisphere:GTEx/v8/Brain_Cortex:GTEx/v8/Brain_Nucleus_accumbens_basal_ganglia:GTEx/v8/Brain_Putamen_basal_ganglia:GTEx/v8/Breas…	+	1.24e-19	rs6006220;rs2857633;rs5763378;rs713875;rs41174;rs10707434;rs131291;rs9608832	20
Nasal polyps	ENSG00000227616	AC063976.1	5	131483184	131485252	-1	pseudogene	NA	NA	NA	NA	1	4.998	0	NA	NA	NA	NA	0.00021	rs17132288	5
Chronic Diseases of Tonsils and Adenoids	ENSG00000227634	RP11-431K24.3	1	8268732	8275270	1	lincRNA	102724539	LINC01714	NA	NA	5	7.415	23	4.46129e-08	0.000530858	GTEx/v8/Liver	+	2.16e-08	rs12082271	1
Chronic Diseases of Tonsils and Adenoids	ENSG00000200976	Y_RNA	22	30154747	30154848	1	misc_RNA	NA	NA	NA	NA	0	0	66	3.37661e-05	0.049	DICE/T_CD4_TH1_17	+	2.17e-13	rs10707434;rs2857633;rs131291	20
Nasal polyps	ENSG00000228126	LINC00568	1	150488233	150490508	1	lincRNA	100874054	LINC00568	NA	NA	0	0	161	1.29717e-05	0.000512201	GTEx/v8/Heart_Left_Ventricle:GTEx/v8/Skin_Sun_Exposed_Lower_leg	-	2.17e-10	rs2089081	1
Chronic Diseases of Tonsils and Adenoids	ENSG00000228437	RP11-400N13.2	1	222139683	222158306	1	lincRNA	NA	NA	NA	NA	2	2.237	0	NA	NA	NA	NA	1.69e-09	rs55728445;rs12128267	2
Chronic Diseases of Tonsils and Adenoids	ENSG00000229305	RP11-431K24.2	1	8249884	8252830	1	pseudogene	NA	NA	NA	NA	2	0.15	0	NA	NA	NA	NA	2.16e-08	rs12082271	1
Nasal polyps	ENSG00000229357	CYCSP51	1	150876372	150876689	1	pseudogene	343045	CYCSP51	NA	NA	1	0.197	0	NA	NA	NA	NA	NA	rs2089081	1
Nasal polyps	ENSG00000229917	RPL7P46	16	11120881	11121620	1	pseudogene	642451	RPL7P46	NA	NA	1	7.284	0	NA	NA	NA	NA	0.000343	rs12935413	10
Infectious and inflammatory respiratory diseases	ENSG00000119408	NEK6	9	127019885	127115586	1	protein_coding	10783	NEK6	0.644138	-0.314011	79	15.55	144	4.24127e-39	3.14087e-38	DICE/Monocyte_classical:DICE/NK:GTEx/v8/Whole_Blood:GTEx/v8/Brain_Cerebellar_Hemisphere:GTEx/v8/Breast_Mammary_Tissue:GTEx/v8/Lung:GTEx/v8/Nerve_Tibial:GTEx/v8/Pancreas:GTEx/v8/Prostate:GTEx/v8/Minor_Salivary_Gland:GTEx/v8/Skin_Not_Sun_Exposed_Suprapubic:GTEx/v8/Skin_Sun_Exposed_Lower_leg:GTEx/v8/Thyroid	-	1.75e-10	rs10116520;rs17315546;rs3758213	8
Chronic Diseases of Tonsils and Adenoids	ENSG00000227201	CNN2P1	22	30442265	30443182	-1	pseudogene	646467	CNN2P1	NA	NA	0	0	3	5.70031e-05	0.049	DICE/T_CD4_TH17	-	2.58e-13	rs131291;rs10707434	20
Infectious and inflammatory respiratory diseases	ENSG00000230223	ATXN8OS	13	70681345	70713561	1	antisense	6315	ATXN8OS	NA	NA	0	0	5	7.43059e-07	1.15513e-23	GTEx/v8/Brain_Anterior_cingulate_cortex_BA24:GTEx/v8/Brain_Cerebellum:GTEx/v8/Brain_Cortex:GTEx/v8/Brain_Hippocampus	-	4.6e-08	rs9542155	10
Peritonsillar Abscess	ENSG00000230223	ATXN8OS	13	70681345	70713561	1	antisense	6315	ATXN8OS	NA	NA	0	0	8	2.6639e-06	1.15513e-23	GTEx/v8/Brain_Anterior_cingulate_cortex_BA24:GTEx/v8/Brain_Cerebellum:GTEx/v8/Brain_Cortex	-	1.56e-13	rs3003202;rs9592672	4
Chronic Diseases of Tonsils and Adenoids	ENSG00000235786	ZNRF3-IT1	22	29388709	29414608	1	sense_intronic	100874339	ZNRF3-IT1	NA	NA	0	0	2	6.13932e-05	0.049	DICE/T_CD4_naive_TREG	+	5.81e-06	rs6006220	20
Nasal polyps	ENSG00000230581	RP11-390F4.8	9	6834456	6835577	1	pseudogene	NA	NA	NA	NA	0	0	1	0.00011792	0.00155699	GTEx/v8/Skin_Not_Sun_Exposed_Suprapubic	+	8.7e-12	rs2381426	6
Nasal polyps	ENSG00000231073	RP11-316M1.3	1	150945599	150948010	1	antisense	NA	NA	NA	NA	3	11.15	0	NA	NA	NA	NA	3.2e-05	rs2089081	1
Peritonsillar Abscess	ENSG00000231123	SPATA20P1	21	39610149	39610586	-1	pseudogene	100874060	SPATA20P1	NA	NA	0	0	47	3.52961e-07	0.000864738	GTEx/v8/Whole_Blood	+	4.88e-08	rs9980837	5
Infectious and inflammatory respiratory diseases	ENSG00000231381	RNF2P1	9	6668999	6670008	-1	pseudogene	100132467	RNF2P1	NA	NA	0	0	1	2.00534e-05	4.78711e-42	GTEx/v8/Thyroid	-	5.49e-10	rs2095044	7
Vasomotor and Allergic rhinitis	ENSG00000231381	RNF2P1	9	6668999	6670008	-1	pseudogene	100132467	RNF2P1	NA	NA	0	0	1	2.00534e-05	4.78711e-42	GTEx/v8/Thyroid	-	3.44e-08	rs2381416	3
Chronic rhinosinusitis	ENSG00000231381	RNF2P1	9	6668999	6670008	-1	pseudogene	100132467	RNF2P1	NA	NA	0	0	1	2.00534e-05	4.78711e-42	GTEx/v8/Thyroid	-	2.65e-15	rs2095044	3
Nasal polyps	ENSG00000231381	RNF2P1	9	6668999	6670008	-1	pseudogene	100132467	RNF2P1	NA	NA	0	0	1	2.00534e-05	4.78711e-42	GTEx/v8/Thyroid	-	3.7e-35	rs2095044	6
Nasal polyps	ENSG00000231585	AC034228.2	5	131347141	131348892	1	antisense	NA	NA	NA	NA	1	7.743	0	NA	NA	NA	NA	3.87e-09	rs17132288	5
Chronic Diseases of Tonsils and Adenoids	ENSG00000232125	DYTN	2	207516345	207583120	-1	protein_coding	391475	DYTN	2.80413e-15	0.156503	6	6.846	0	NA	NA	NA	NA	1.97e-08	rs56848317	6
Chronic Diseases of Tonsils and Adenoids	ENSG00000232396	RP1-76B20.11	22	30101245	30115848	-1	antisense	NA	NA	NA	NA	5	10.02	0	NA	NA	NA	NA	5.52e-13	rs2857633;rs5763378;rs9608832	20
Chronic rhinosinusitis	ENSG00000232871	SEC1P	19	49141328	49184461	1	pseudogene	653677	SEC1P	NA	NA	0	0	53	3.98619e-18	8.88938e-62	DICE/Monocyte_classical:GTEx/v8/Adipose_Subcutaneous:GTEx/v8/Adipose_Visceral_Omentum:GTEx/v8/Adrenal_Gland:GTEx/v8/Whole_Blood:GTEx/v8/Artery_Aorta:GTEx/v8/Artery_Tibial:GTEx/v8/Brain_Cerebellar_Hemisphere:GTEx/v8/Brain_Cerebellum:GTEx/v8/Brain_Nucleus_accumbens_basal_ganglia:GTEx/v8/Breast_Mammary_Tissue:GTEx/v8/Colon_Sigmoid:GTEx/v8/Esophagus_Gastroesophageal_Junction:GTEx/v8/Esophagus_Mucosa:…	+	2.49e-08	rs281379	5
Nasal polyps	ENSG00000233006	AC034220.3	5	131646978	131705608	-1	processed_transcript	553103	MIR3936HG	NA	NA	8	13.13	134	7.77646e-41	1.67659e-73	GTEx/v8/Adipose_Subcutaneous:GTEx/v8/Adipose_Visceral_Omentum:GTEx/v8/Adrenal_Gland:GTEx/v8/Artery_Aorta:GTEx/v8/Brain_Amygdala:GTEx/v8/Brain_Anterior_cingulate_cortex_BA24:GTEx/v8/Brain_Caudate_basal_ganglia:GTEx/v8/Brain_Cerebellar_Hemisphere:GTEx/v8/Brain_Cerebellum:GTEx/v8/Brain_Cortex:GTEx/v8/Brain_Frontal_Cortex_BA9:GTEx/v8/Brain_Hippocampus:GTEx/v8/Brain_Hypothalamus:GTEx/v8/Brain_Nucleus_…	-	3.14e-09	rs56399423;rs17132288	5
Nasal polyps	ENSG00000233367	RP11-307L3.4	9	6415145	6449558	-1	antisense	NA	NA	NA	NA	1	5.819	0	NA	NA	NA	NA	4.44e-14	rs111450597	6
Chronic Diseases of Tonsils and Adenoids	ENSG00000234208	CTA-256D12.11	22	29909878	29931379	-1	sense_intronic	NA	NA	NA	NA	8	9.54	0	NA	NA	NA	NA	3.88e-09	rs5763378;rs6006220	20
Nasal polyps	ENSG00000234290	AC116366.6	5	131804582	131808735	-1	antisense	NA	NA	NA	NA	0	0	133	2.54373e-23	5.80123e-22	GTEx/v8/Whole_Blood:GTEx/v8/Skin_Not_Sun_Exposed_Suprapubic	-	3.14e-09	rs17132288;rs56399423	5
Infectious and inflammatory respiratory diseases	ENSG00000234389	AC007278.3	2	103055173	103056935	1	sense_intronic	NA	NA	NA	NA	0	0	89	1.17127e-22	3.59097e-93	GTEx/v8/Adipose_Subcutaneous:GTEx/v8/Adipose_Visceral_Omentum:GTEx/v8/Whole_Blood:GTEx/v8/Esophagus_Mucosa:GTEx/v8/Esophagus_Muscularis:GTEx/v8/Heart_Atrial_Appendage:GTEx/v8/Lung:GTEx/v8/Spleen:GTEx/v8/Thyroid	-	2.69e-08	rs950881	1
Vasomotor and Allergic rhinitis	ENSG00000234389	AC007278.3	2	103055173	103056935	1	sense_intronic	NA	NA	NA	NA	0	0	140	5.89934e-47	3.59097e-93	GTEx/v8/Adipose_Subcutaneous:GTEx/v8/Adipose_Visceral_Omentum:GTEx/v8/Adrenal_Gland:GTEx/v8/Whole_Blood:GTEx/v8/Breast_Mammary_Tissue:GTEx/v8/Colon_Transverse:GTEx/v8/Esophagus_Gastroesophageal_Junction:GTEx/v8/Esophagus_Mucosa:GTEx/v8/Esophagus_Muscularis:GTEx/v8/Heart_Atrial_Appendage:GTEx/v8/Heart_Left_Ventricle:GTEx/v8/Lung:GTEx/v8/Muscle_Skeletal:GTEx/v8/Nerve_Tibial:GTEx/v8/Prostate:GTEx/v8…	-	5.02e-10	rs11690644;rs10208293	1
Chronic rhinosinusitis	ENSG00000234389	AC007278.3	2	103055173	103056935	1	sense_intronic	NA	NA	NA	NA	0	0	84	1.17127e-22	3.59097e-93	GTEx/v8/Adipose_Subcutaneous:GTEx/v8/Adipose_Visceral_Omentum:GTEx/v8/Whole_Blood:GTEx/v8/Esophagus_Mucosa:GTEx/v8/Heart_Atrial_Appendage:GTEx/v8/Lung:GTEx/v8/Spleen:GTEx/v8/Thyroid	-	2.1e-08	rs72823677	1
Nasal polyps	ENSG00000234389	AC007278.3	2	103055173	103056935	1	sense_intronic	NA	NA	NA	NA	5	4.721	238	9.51521e-107	3.59097e-93	DICE/T_CD4_naive_activated:DICE/T_CD8_naive_activated:DICE/NK:DICE/T_CD4_TH1_17:GTEx/v8/Adipose_Subcutaneous:GTEx/v8/Adipose_Visceral_Omentum:GTEx/v8/Adrenal_Gland:GTEx/v8/Whole_Blood:GTEx/v8/Artery_Aorta:GTEx/v8/Brain_Caudate_basal_ganglia:GTEx/v8/Brain_Cortex:GTEx/v8/Brain_Putamen_basal_ganglia:GTEx/v8/Brain_Spinal_cord_cervical_c-1:GTEx/v8/Breast_Mammary_Tissue:GTEx/v8/Colon_Sigmoid:GTEx/v8/Co…	-	6.04e-13	rs56117144;rs13020553;rs6755905;rs141508079;rs10208293	2
Chronic Diseases of Tonsils and Adenoids	ENSG00000234409	AC006547.14	22	20135950	20138399	-1	protein_coding	388849	CCDC188	NA	NA	4	9.1	6	3.78461e-06	7.94654e-34	GTEx/v8/Nerve_Tibial	-	2.39e-09	rs78426131	19
Infectious and inflammatory respiratory diseases	ENSG00000235204	RP11-121A14.2	9	127021529	127023435	-1	antisense	613206	LOC613206	NA	NA	4	8.645	110	1.34861e-07	0.000198279	GTEx/v8/Thyroid	-	1.75e-10	rs10116520;rs17315546;rs3758213	8
Vasomotor and Allergic rhinitis	ENSG00000235204	RP11-121A14.2	9	127021529	127023435	-1	antisense	613206	LOC613206	NA	NA	0	0	15	9.82844e-07	0.000198279	GTEx/v8/Thyroid	-	1.65e-08	rs3758213	4
Peritonsillar Abscess	ENSG00000173706	HEG1	3	124684554	124774802	-1	protein_coding	57493	HEG1	6.9896e-06	0.180704	0	0	1	2.06189e-05	0.0414353	DICE/Monocyte_non_classical:GTEx/v8/Brain_Cortex	-	1.46e-05	rs816340	2
Vasomotor and Allergic rhinitis	ENSG00000236304	AP001189.4	11	76368100	76374910	1	antisense	NA	NA	NA	NA	0	0	1	0.000158055	8.53592e-78	GTEx/v8/Whole_Blood	+	1.57e-09	rs11236795	5
Infectious and inflammatory respiratory diseases	ENSG00000236525	AC007278.2	2	103050417	103051800	1	sense_intronic	NA	NA	NA	NA	1	2.49	81	2.60995e-07	1.43181e-21	GTEx/v8/Whole_Blood	-	2.69e-08	rs950881	1
Vasomotor and Allergic rhinitis	ENSG00000236525	AC007278.2	2	103050417	103051800	1	sense_intronic	NA	NA	NA	NA	1	2.49	131	2.60995e-07	1.43181e-21	GTEx/v8/Whole_Blood	-	5.02e-10	rs11690644;rs10208293	1
Chronic rhinosinusitis	ENSG00000236525	AC007278.2	2	103050417	103051800	1	sense_intronic	NA	NA	NA	NA	1	2.49	76	2.60995e-07	1.43181e-21	GTEx/v8/Whole_Blood	-	2.1e-08	rs72823677	1
Nasal polyps	ENSG00000236525	AC007278.2	2	103050417	103051800	1	sense_intronic	NA	NA	NA	NA	3	6.322	158	2.20135e-14	1.43181e-21	DICE/T_CD4_memory_TREG:GTEx/v8/Whole_Blood:GTEx/v8/Lung	-	6.5e-13	rs56117144;rs13020553;rs141508079;rs10208293;rs6755905	2
Nasal polyps	ENSG00000236713	RP11-363I22.3	1	150752748	150753120	1	pseudogene	NA	NA	NA	NA	2	3.234	0	NA	NA	NA	NA	5.73e-10	rs2089081	1
Infectious and inflammatory respiratory diseases	ENSG00000236785	AC007248.7	2	103027703	103028568	1	pseudogene	NA	NA	NA	NA	2	2.704	85	5.411e-08	7.4809e-07	GTEx/v8/Lung	+	2.69e-08	rs950881	1
Vasomotor and Allergic rhinitis	ENSG00000236785	AC007248.7	2	103027703	103028568	1	pseudogene	NA	NA	NA	NA	2	2.704	138	5.411e-08	7.4809e-07	DICE/NK:GTEx/v8/Whole_Blood:GTEx/v8/Lung	+	5.02e-10	rs11690644;rs10208293	1
Chronic rhinosinusitis	ENSG00000236785	AC007248.7	2	103027703	103028568	1	pseudogene	NA	NA	NA	NA	2	2.704	84	5.411e-08	7.4809e-07	GTEx/v8/Lung	+	2.1e-08	rs72823677	1
Nasal polyps	ENSG00000236785	AC007248.7	2	103027703	103028568	1	pseudogene	NA	NA	NA	NA	9	10.76	136	1.71475e-10	7.4809e-07	DICE/NK:DICE/T_CD4_TH17:DICE/T_CD4_TH1_17:GTEx/v8/Whole_Blood:GTEx/v8/Lung	+	2.57e-12	rs6755905;rs56117144;rs10208293;rs141508079	2
Infectious and inflammatory respiratory diseases	ENSG00000236924	RP11-390F4.6	9	6645956	6670635	1	lincRNA	NA	NA	NA	NA	0	0	1	0.000107728	2.54785e-40	GTEx/v8/Thyroid	-	5.49e-10	rs2095044	7
Vasomotor and Allergic rhinitis	ENSG00000236924	RP11-390F4.6	9	6645956	6670635	1	lincRNA	NA	NA	NA	NA	0	0	1	0.000107728	2.54785e-40	GTEx/v8/Thyroid	-	3.44e-08	rs2381416	3
Chronic rhinosinusitis	ENSG00000236924	RP11-390F4.6	9	6645956	6670635	1	lincRNA	NA	NA	NA	NA	0	0	1	0.000107728	2.54785e-40	GTEx/v8/Thyroid	-	2.65e-15	rs2095044	3
Nasal polyps	ENSG00000236924	RP11-390F4.6	9	6645956	6670635	1	lincRNA	NA	NA	NA	NA	0	0	1	0.000107728	2.54785e-40	GTEx/v8/Thyroid	-	3.7e-35	rs2095044	6
Chronic Diseases of Tonsils and Adenoids	ENSG00000237172	B3GNT9	16	67182008	67185117	-1	protein_coding	84752	B3GNT9	0.0228247	-1.13701	0	0	7	3.12529e-06	1.54885e-11	GTEx/v8/Cells_Cultured_fibroblasts	+	2.92e-08	rs117556162	14
Infectious and inflammatory respiratory diseases	ENSG00000237274	RP11-575C20.1	9	6195934	6197248	1	pseudogene	NA	NA	NA	NA	4	7.559	0	NA	NA	NA	NA	7.29e-10	rs2095044;rs72699186	7
Vasomotor and Allergic rhinitis	ENSG00000237274	RP11-575C20.1	9	6195934	6197248	1	pseudogene	NA	NA	NA	NA	3	7.559	0	NA	NA	NA	NA	7.12e-08	rs2381416	3
Chronic rhinosinusitis	ENSG00000237274	RP11-575C20.1	9	6195934	6197248	1	pseudogene	NA	NA	NA	NA	4	7.559	0	NA	NA	NA	NA	1.26e-15	rs2095044;rs11506294;rs10975479	3
Nasal polyps	ENSG00000237274	RP11-575C20.1	9	6195934	6197248	1	pseudogene	NA	NA	NA	NA	4	7.559	0	NA	NA	NA	NA	8.48e-36	rs2095044;rs2225537;rs11506294;rs10975479	6
Nasal polyps	ENSG00000237493	RP11-603J24.7	12	56374216	56374819	-1	pseudogene	NA	NA	NA	NA	1	1.039	0	NA	NA	NA	NA	4.12e-08	rs705702	9
Nasal polyps	ENSG00000237714	P4HA2-AS1	5	131520569	131528501	1	antisense	100861518	P4HA2-AS1	NA	NA	2	11.63	0	NA	NA	NA	NA	0.000111	rs17132288	5
Nasal polyps	ENSG00000237781	RP11-54A4.2	1	150521040	150530200	-1	antisense	NA	NA	NA	NA	0	0	218	1.15493e-12	1.16204e-37	GTEx/v8/Adipose_Subcutaneous:GTEx/v8/Adipose_Visceral_Omentum:GTEx/v8/Adrenal_Gland:GTEx/v8/Artery_Aorta:GTEx/v8/Breast_Mammary_Tissue:GTEx/v8/Esophagus_Gastroesophageal_Junction:GTEx/v8/Esophagus_Muscularis:GTEx/v8/Heart_Atrial_Appendage:GTEx/v8/Lung:GTEx/v8/Nerve_Tibial:GTEx/v8/Pancreas:GTEx/v8/Prostate:GTEx/v8/Minor_Salivary_Gland:GTEx/v8/Skin_Not_Sun_Exposed_Suprapubic:GTEx/v8/Spleen:GTEx/v8/…	-	2.17e-10	rs2089081	1
Chronic Diseases of Tonsils and Adenoids	ENSG00000237892	KLF7-IT1	2	207985608	207986768	-1	sense_intronic	100874272	KLF7-IT1	NA	NA	0	0	12	1.54065e-05	0.0143979	GTEx/v8/Nerve_Tibial	-	9.43e-09	rs56848317	6
Chronic Diseases of Tonsils and Adenoids	ENSG00000238042	RP11-815M8.1	1	222054323	222151865	-1	lincRNA	105372950	LINC02257	NA	NA	3	2.237	0	NA	NA	NA	NA	7.38e-11	rs12128267;rs55728445	2
Chronic Diseases of Tonsils and Adenoids	ENSG00000239446	RP1-76B20.12	22	30107809	30115703	-1	antisense	NA	NA	NA	NA	3	10.02	0	NA	NA	NA	NA	5.52e-13	rs9608832;rs2857633;rs5763378	20
Nasal polyps	ENSG00000239642	AC034228.7	5	131142816	131281391	-1	pseudogene	728637	MEIKIN	NA	NA	2	0.369	81	8.71038e-08	5.92654e-37	GTEx/v8/Whole_Blood:GTEx/v8/Brain_Caudate_basal_ganglia:GTEx/v8/Heart_Atrial_Appendage:GTEx/v8/Spleen	+	3.14e-09	rs17132288;rs56399423	5
Chronic Diseases of Tonsils and Adenoids	ENSG00000239704	CDRT4	17	15339332	15406922	-1	protein_coding	284040	CDRT4	0.244291	NA	0	0	3	9.87287e-09	2.69557e-90	GTEx/v8/Artery_Tibial:GTEx/v8/Skin_Sun_Exposed_Lower_leg	-	2.99e-08	rs17776585	16
Chronic Diseases of Tonsils and Adenoids	ENSG00000240395	RPL5P23	8	42199285	42200152	-1	pseudogene	100270840	RPL5P23	NA	NA	0	0	65	6.30202e-10	4.6719e-11	GTEx/v8/Skin_Sun_Exposed_Lower_leg	+	1.61e-09	rs142125570;rs73631760	10
Chronic Diseases of Tonsils and Adenoids	ENSG00000241322	CDRT1	17	15468798	15522826	-1	protein_coding	374286	CDRT1	NA	0.0548487	0	0	13	1.81616e-06	1.76136e-11	GTEx/v8/Esophagus_Mucosa:GTEx/v8/Muscle_Skeletal:GTEx/v8/Skin_Sun_Exposed_Lower_leg	-	6.17e-09	rs17776585;rs117204737;rs142141461	16
Nasal polyps	ENSG00000243350	RP11-379F12.3	10	8094205	8095412	-1	lincRNA	NA	NA	NA	NA	1	13.12	0	NA	NA	NA	NA	4.98e-08	rs2275806	7
Infectious and inflammatory respiratory diseases	ENSG00000243383	RN7SL89P	4	106214815	106215100	1	misc_RNA	106479256	RN7SL89P	NA	NA	6	4.396	0	NA	NA	NA	NA	2.12e-05	rs5860793	4
Chronic Diseases of Tonsils and Adenoids	ENSG00000243383	RN7SL89P	4	106214815	106215100	1	misc_RNA	106479256	RN7SL89P	NA	NA	6	4.396	0	NA	NA	NA	NA	6.72e-06	rs5860793;rs2647232	9
Peritonsillar Abscess	ENSG00000244119	PDCL3P4	3	101431316	101432035	1	pseudogene	285359	PDCL3P4	NA	NA	0	0	4	2.40289e-06	1.19892e-31	GTEx/v8/Brain_Anterior_cingulate_cortex_BA24:GTEx/v8/Brain_Cerebellum:GTEx/v8/Muscle_Skeletal	-	9.36e-09	rs1456200	1
Infectious and inflammatory respiratory diseases	ENSG00000111321	LTBR	12	6484211	6500733	1	protein_coding	4055	LTBR	0.428683	-0.265481	7	11.29	13	3.26489e-89	5.75011e-90	DICE/T_CD4_naive_activated:DICE/NK:DICE/T_CD4_naive_TREG:GTEx/v8/Adipose_Subcutaneous:GTEx/v8/Adipose_Visceral_Omentum:GTEx/v8/Adrenal_Gland:GTEx/v8/Cells_EBV-transformed_lymphocytes:GTEx/v8/Whole_Blood:GTEx/v8/Artery_Aorta:GTEx/v8/Artery_Coronary:GTEx/v8/Artery_Tibial:GTEx/v8/Brain_Amygdala:GTEx/v8/Brain_Anterior_cingulate_cortex_BA24:GTEx/v8/Brain_Caudate_basal_ganglia:GTEx/v8/Brain_Cerebellar_…	+	6.22e-12	rs10849449;rs12354	9
Chronic Diseases of Tonsils and Adenoids	ENSG00000246560	RP11-10L12.4	4	103749212	103765232	1	antisense	105377348	LOC105377348	NA	NA	0	0	7	1.47528e-05	9.57963e-12	GTEx/v8/Pituitary:GTEx/v8/Cells_Cultured_fibroblasts	-	2.16e-07	rs4648052	8
Infectious and inflammatory respiratory diseases	ENSG00000248161	RP11-499E18.1	4	103339759	103371167	-1	lincRNA	NA	NA	NA	NA	0	0	13	2.96203e-05	0.015542	GTEx/v8/Muscle_Skeletal	-	3.05e-08	rs17033015	3
Infectious and inflammatory respiratory diseases	ENSG00000248969	CTD-2113L7.1	5	35678586	35827120	-1	antisense	NA	NA	NA	NA	1	2.908	0	NA	NA	NA	NA	3.25e-08	rs7717955	5
Infectious and inflammatory respiratory diseases	ENSG00000139197	PEX5	12	7341281	7371170	1	protein_coding	5830	PEX5	0.401175	0.0561354	0	0	5	4.0157e-05	0.049	DICE/Monocyte_non_classical	+	3.46e-11	rs10849449;rs12354	9
Peritonsillar Abscess	ENSG00000111321	LTBR	12	6484211	6500733	1	protein_coding	4055	LTBR	0.428683	-0.265481	7	11.29	13	3.26489e-89	5.75011e-90	DICE/T_CD4_naive_activated:DICE/NK:DICE/T_CD4_naive_TREG:GTEx/v8/Adipose_Subcutaneous:GTEx/v8/Adipose_Visceral_Omentum:GTEx/v8/Adrenal_Gland:GTEx/v8/Cells_EBV-transformed_lymphocytes:GTEx/v8/Whole_Blood:GTEx/v8/Artery_Aorta:GTEx/v8/Artery_Coronary:GTEx/v8/Artery_Tibial:GTEx/v8/Brain_Amygdala:GTEx/v8/Brain_Anterior_cingulate_cortex_BA24:GTEx/v8/Brain_Caudate_basal_ganglia:GTEx/v8/Brain_Cerebellar_…	+	7.7e-10	rs12354;rs10849449	3
Vasomotor and Allergic rhinitis	ENSG00000249318	AC010468.2	5	110601507	110605787	-1	antisense	NA	NA	NA	NA	1	4.306	0	NA	NA	NA	NA	3.98e-07	rs72793573	2
Nasal polyps	ENSG00000249318	AC010468.2	5	110601507	110605787	-1	antisense	NA	NA	NA	NA	5	9.835	0	NA	NA	NA	NA	1.07e-06	rs1457115;rs56858603;rs9285875	4
Chronic Diseases of Tonsils and Adenoids	ENSG00000249923	XXbac-B444P24.8	22	20186252	20192441	-1	antisense	284865	LOC284865	NA	NA	0	0	5	8.07442e-07	5.54838e-23	GTEx/v8/Nerve_Tibial:GTEx/v8/Stomach	+	2.39e-09	rs78426131	19
Vasomotor and Allergic rhinitis	ENSG00000250728	AC010468.3	5	110490942	110491850	-1	pseudogene	NA	NA	NA	NA	5	12.95	0	NA	NA	NA	NA	1.96e-06	rs72793573	2
Infectious and inflammatory respiratory diseases	ENSG00000251259	AC004069.2	4	106058437	106061776	-1	lincRNA	NA	NA	NA	NA	0	0	5	2.40967e-05	0.0108142	GTEx/v8/Skin_Not_Sun_Exposed_Suprapubic	-	9.47e-07	rs5860793	4
Chronic Diseases of Tonsils and Adenoids	ENSG00000251259	AC004069.2	4	106058437	106061776	-1	lincRNA	NA	NA	NA	NA	0	0	11	1.29976e-05	0.0108142	GTEx/v8/Skin_Not_Sun_Exposed_Suprapubic	-	6.32e-09	rs5860793;rs2647232	9
Infectious and inflammatory respiratory diseases	ENSG00000159335	PTMS	12	6874682	6880116	1	protein_coding	5763	PTMS	0.778968	NA	0	0	6	7.00734e-06	0.049	DICE/T_CD8_naive	+	1.89e-11	rs10849449;rs12354	9
Peritonsillar Abscess	ENSG00000139197	PEX5	12	7341281	7371170	1	protein_coding	5830	PEX5	0.401175	0.0561354	0	0	5	4.0157e-05	0.049	DICE/Monocyte_non_classical	+	1.64e-09	rs12354;rs10849449	3
Infectious and inflammatory respiratory diseases	ENSG00000251586	TET2-AS1	4	106092511	106099220	-1	antisense	104384744	TET2-AS1	NA	NA	1	0.69	0	NA	NA	NA	NA	1.42e-07	rs5860793	4
Chronic Diseases of Tonsils and Adenoids	ENSG00000251586	TET2-AS1	4	106092511	106099220	-1	antisense	104384744	TET2-AS1	NA	NA	1	0.69	3	6.63446e-05	1.52173e-06	GTEx/v8/Esophagus_Muscularis	+	1.46e-09	rs5860793;rs2647232	9
Nasal polyps	ENSG00000253047	SNORA40	1	150573015	150573135	-1	snoRNA	677822	SNORA40	NA	NA	1	0.35	0	NA	NA	NA	NA	3.89e-05	rs2089081	1
Nasal polyps	ENSG00000253067	snoZ6	5	131415759	131415826	1	snoRNA	NA	NA	NA	NA	1	1.164	0	NA	NA	NA	NA	2.4e-08	rs56399423;rs17132288	5
Peritonsillar Abscess	ENSG00000159335	PTMS	12	6874682	6880116	1	protein_coding	5763	PTMS	0.778968	NA	0	0	6	7.00734e-06	0.049	DICE/T_CD8_naive	+	1.64e-09	rs12354;rs10849449	3
Chronic Diseases of Tonsils and Adenoids	ENSG00000253408	RP11-231D20.2	8	42091193	42128715	-1	antisense	101929897	LOC101929897	NA	NA	4	6.19	0	NA	NA	NA	NA	6.86e-07	rs142125570	10
Vasomotor and Allergic rhinitis	ENSG00000253613	CTC-551A13.2	5	110412619	110427813	-1	antisense	NA	NA	NA	NA	11	9.124	0	NA	NA	NA	NA	5.07e-11	rs1438673;rs79881201	2
Chronic rhinosinusitis	ENSG00000253613	CTC-551A13.2	5	110412619	110427813	-1	antisense	NA	NA	NA	NA	11	9.124	0	NA	NA	NA	NA	2.46e-12	rs1438673;rs17624673	2
Nasal polyps	ENSG00000253613	CTC-551A13.2	5	110412619	110427813	-1	antisense	NA	NA	NA	NA	19	9.124	0	NA	NA	NA	NA	1.89e-16	rs1438673;rs7722241;rs34962275	4
Vasomotor and Allergic rhinitis	ENSG00000254755	RP11-672A2.7	11	76302067	76302255	1	pseudogene	NA	NA	NA	NA	5	5.239	0	NA	NA	NA	NA	3.42e-08	rs7936434	5
Nasal polyps	ENSG00000255990	AC034102.1	12	56385991	56388469	1	pseudogene	NA	NA	NA	NA	1	6.489	0	NA	NA	NA	NA	4.78e-06	rs705702	9
Infectious and inflammatory respiratory diseases	ENSG00000256433	RP1-102E24.8	12	6503071	6504235	1	lincRNA	NA	NA	NA	NA	5	6.596	13	5.50762e-13	2.02004e-32	GTEx/v8/Adipose_Subcutaneous:GTEx/v8/Adipose_Visceral_Omentum:GTEx/v8/Artery_Tibial:GTEx/v8/Colon_Sigmoid:GTEx/v8/Esophagus_Mucosa:GTEx/v8/Heart_Atrial_Appendage:GTEx/v8/Heart_Left_Ventricle:GTEx/v8/Lung:GTEx/v8/Muscle_Skeletal:GTEx/v8/Nerve_Tibial:GTEx/v8/Cells_Cultured_fibroblasts:GTEx/v8/Skin_Not_Sun_Exposed_Suprapubic:GTEx/v8/Thyroid	+	6.22e-12	rs10849449;rs12354	9
Chronic Diseases of Tonsils and Adenoids	ENSG00000256433	RP1-102E24.8	12	6503071	6504235	1	lincRNA	NA	NA	NA	NA	5	6.596	12	5.50762e-13	2.02004e-32	GTEx/v8/Adipose_Subcutaneous:GTEx/v8/Adipose_Visceral_Omentum:GTEx/v8/Artery_Tibial:GTEx/v8/Colon_Sigmoid:GTEx/v8/Esophagus_Mucosa:GTEx/v8/Heart_Atrial_Appendage:GTEx/v8/Heart_Left_Ventricle:GTEx/v8/Lung:GTEx/v8/Muscle_Skeletal:GTEx/v8/Nerve_Tibial:GTEx/v8/Cells_Cultured_fibroblasts:GTEx/v8/Skin_Not_Sun_Exposed_Suprapubic:GTEx/v8/Thyroid	+	3e-15	rs2364481	12
Peritonsillar Abscess	ENSG00000256433	RP1-102E24.8	12	6503071	6504235	1	lincRNA	NA	NA	NA	NA	5	6.596	13	5.50762e-13	2.02004e-32	GTEx/v8/Adipose_Subcutaneous:GTEx/v8/Adipose_Visceral_Omentum:GTEx/v8/Artery_Tibial:GTEx/v8/Colon_Sigmoid:GTEx/v8/Esophagus_Mucosa:GTEx/v8/Heart_Atrial_Appendage:GTEx/v8/Heart_Left_Ventricle:GTEx/v8/Lung:GTEx/v8/Muscle_Skeletal:GTEx/v8/Nerve_Tibial:GTEx/v8/Cells_Cultured_fibroblasts:GTEx/v8/Skin_Not_Sun_Exposed_Suprapubic:GTEx/v8/Thyroid	+	7.7e-10	rs12354;rs10849449	3
Nasal polyps	ENSG00000257303	RP11-977G19.11	12	56693926	56708592	1	antisense	112268098	LOC112268098	NA	NA	0	0	2	0.000180578	6.32926e-34	GTEx/v8/Nerve_Tibial:GTEx/v8/Thyroid	+	1.13e-07	rs705702	9
Nasal polyps	ENSG00000257449	RP11-603J24.4	12	56423433	56435590	-1	antisense	NA	NA	NA	NA	3	9.023	0	NA	NA	NA	NA	4.37e-07	rs705702	9
Nasal polyps	ENSG00000259357	RP11-316M1.12	1	150937736	150938734	1	antisense	NA	NA	NA	NA	2	16.25	0	NA	NA	NA	NA	0.000115	rs2089081	1
Chronic Diseases of Tonsils and Adenoids	ENSG00000260304	RP11-388M20.6	16	31193832	31194606	-1	antisense	NA	NA	NA	NA	0	0	5	4.15172e-05	1.46887e-11	GTEx/v8/Adipose_Subcutaneous:GTEx/v8/Muscle_Skeletal	-	4.48e-08	rs6565189	13
Chronic Diseases of Tonsils and Adenoids	ENSG00000260487	RP11-297C4.3	16	30491909	30492667	-1	antisense	NA	NA	NA	NA	0	0	5	2.28667e-09	2.5344e-22	GTEx/v8/Adipose_Visceral_Omentum:GTEx/v8/Artery_Coronary:GTEx/v8/Brain_Cerebellum:GTEx/v8/Breast_Mammary_Tissue:GTEx/v8/Heart_Left_Ventricle	-	4.48e-08	rs6565189	13
Infectious and inflammatory respiratory diseases	ENSG00000260651	AF213884.2	4	103421998	103422476	-1	antisense	NA	NA	NA	NA	1	6.56	146	6.95316e-08	0.000116832	GTEx/v8/Muscle_Skeletal:GTEx/v8/Nerve_Tibial	-	4.88e-10	rs230521;rs4648051;rs17033015	3
Chronic Diseases of Tonsils and Adenoids	ENSG00000260651	AF213884.2	4	103421998	103422476	-1	antisense	NA	NA	NA	NA	1	6.56	83	6.95316e-08	0.000116832	GTEx/v8/Muscle_Skeletal:GTEx/v8/Nerve_Tibial	-	5.53e-11	rs4648052	8
Chronic Diseases of Tonsils and Adenoids	ENSG00000260911	RP11-196G11.2	16	31054471	31061201	1	lincRNA	NA	NA	NA	NA	0	0	5	2.0029e-05	6.31137e-45	GTEx/v8/Adipose_Subcutaneous:GTEx/v8/Adipose_Visceral_Omentum:GTEx/v8/Breast_Mammary_Tissue:GTEx/v8/Colon_Transverse:GTEx/v8/Nerve_Tibial:GTEx/v8/Skin_Not_Sun_Exposed_Suprapubic:GTEx/v8/Thyroid	+	4.48e-08	rs6565189	13
Chronic Diseases of Tonsils and Adenoids	ENSG00000261332	RP11-297C4.1	16	30510087	30510875	-1	antisense	NA	NA	NA	NA	0	0	3	2.88736e-06	3.20459e-09	GTEx/v8/Artery_Coronary	-	4.48e-08	rs6565189	13
Chronic Diseases of Tonsils and Adenoids	ENSG00000261864	RP11-67A1.2	16	68111243	68156174	1	processed_transcript	NA	NA	NA	NA	1	6.692	0	NA	NA	NA	NA	4.52e-08	rs117556162	14
Nasal polyps	ENSG00000262020	RP11-66H6.3	16	11160353	11164959	-1	antisense	NA	NA	NA	NA	3	12.06	0	NA	NA	NA	NA	1.63e-07	rs34540843;rs12935413	10
Nasal polyps	ENSG00000262222	RP11-876N24.4	16	11034576	11036878	1	antisense	NA	NA	NA	NA	0	0	100	1.62306e-06	2.48897e-23	GTEx/v8/Adipose_Subcutaneous:GTEx/v8/Whole_Blood:GTEx/v8/Breast_Mammary_Tissue:GTEx/v8/Esophagus_Mucosa:GTEx/v8/Nerve_Tibial:GTEx/v8/Skin_Sun_Exposed_Lower_leg	+	7.8e-09	rs34540843;rs12935413	10
Nasal polyps	ENSG00000262703	RP11-485G7.6	16	11442000	11443178	-1	antisense	NA	NA	NA	NA	0	0	4	5.94987e-05	6.27154e-20	GTEx/v8/Cells_Cultured_fibroblasts:GTEx/v8/Skin_Sun_Exposed_Lower_leg	-	1.22e-08	rs11649554	10
Nasal polyps	ENSG00000263013	RP11-876N24.5	16	11032743	11033901	-1	sense_intronic	NA	NA	NA	NA	0	0	153	4.16947e-15	2.25774e-12	GTEx/v8/Adipose_Subcutaneous:GTEx/v8/Adipose_Visceral_Omentum:GTEx/v8/Breast_Mammary_Tissue:GTEx/v8/Nerve_Tibial:GTEx/v8/Thyroid	-	3.37e-09	rs34540843;rs12935413	10
Nasal polyps	ENSG00000263033	RP11-396B14.2	16	11290034	11318373	1	lincRNA	NA	NA	NA	NA	3	10.46	79	5.38791e-11	1.56482e-08	GTEx/v8/Lung:GTEx/v8/Thyroid	+	3.37e-09	rs11649554;rs34540843;rs12935413	10
Nasal polyps	ENSG00000263179	HNRNPCP4	16	11336510	11337409	1	pseudogene	100421828	HNRNPCP4	NA	NA	0	0	163	3.66589e-16	9.43605e-20	GTEx/v8/Artery_Aorta:GTEx/v8/Artery_Tibial:GTEx/v8/Brain_Cerebellar_Hemisphere:GTEx/v8/Brain_Cerebellum:GTEx/v8/Esophagus_Gastroesophageal_Junction:GTEx/v8/Nerve_Tibial:GTEx/v8/Thyroid	+	3.37e-09	rs12935413;rs34540843;rs11649554	10
Peritonsillar Abscess	ENSG00000157551	KCNJ15	21	39529128	39679279	1	protein_coding	3772	KCNJ15	0.150462	-0.0344617	70	12.61	71	1.97626e-10	4.28302e-10	DICE/T_CD4_naive_activated:DICE/T_CD8_naive_activated:GTEx/v8/Cells_Cultured_fibroblasts:GTEx/v8/Skin_Not_Sun_Exposed_Suprapubic:GTEx/v8/Skin_Sun_Exposed_Lower_leg	+	4.88e-08	rs9980837	5
Nasal polyps	ENSG00000263597	MIR3936	5	131701182	131701291	-1	miRNA	100500865	MIR3936	NA	NA	0	0	97	7.96428e-06	3.27798e-05	GTEx/v8/Muscle_Skeletal	-	3.14e-09	rs17132288;rs56399423	5
Nasal polyps	ENSG00000264508	RN7SL473P	1	150539040	150539336	-1	misc_RNA	106479396	RN7SL473P	NA	NA	1	5.61	0	NA	NA	NA	NA	0.000214	rs2089081	1
Nasal polyps	ENSG00000264584	RN7SL600P	1	150541449	150541745	-1	misc_RNA	106481086	RN7SL600P	NA	NA	1	0.481	0	NA	NA	NA	NA	NA	rs2089081	1
Chronic Diseases of Tonsils and Adenoids	ENSG00000265519	CTD-3157E16.1	17	15691101	15691519	-1	lincRNA	NA	NA	NA	NA	0	0	2	4.99873e-05	1.91667e-24	GTEx/v8/Adipose_Subcutaneous	-	4.32e-07	rs17776585	16
Nasal polyps	ENSG00000267107	AC011526.1	19	41960074	42006559	-1	lincRNA	100505495	PCAT19	NA	NA	0	0	1	0.000145019	3.62198e-81	GTEx/v8/Adipose_Subcutaneous	+	0.000147	rs338597	11
Chronic rhinosinusitis	ENSG00000268093	AC022154.7	19	49122529	49127389	-1	antisense	NA	NA	NA	NA	0	0	1	1.2487e-05	0.0273901	GTEx/v8/Adipose_Visceral_Omentum	+	0.0106	rs281379	5
Chronic rhinosinusitis	ENSG00000269656	CTD-2571L23.6	19	48260293	48272097	-1	antisense	106144593	NOP53-AS1	NA	NA	0	0	1	1.35721e-06	0.00980596	GTEx/v8/Ovary	-	0.00024	rs281379	5
Chronic Diseases of Tonsils and Adenoids	ENSG00000271590	RP11-181E10.3	2	111968572	111970053	-1	lincRNA	NA	NA	NA	NA	0	0	1	7.45599e-22	1.34202e-33	GTEx/v8/Adipose_Subcutaneous:GTEx/v8/Adipose_Visceral_Omentum:GTEx/v8/Artery_Tibial:GTEx/v8/Breast_Mammary_Tissue:GTEx/v8/Esophagus_Mucosa:GTEx/v8/Esophagus_Muscularis:GTEx/v8/Heart_Atrial_Appendage:GTEx/v8/Lung:GTEx/v8/Muscle_Skeletal:GTEx/v8/Nerve_Tibial:GTEx/v8/Prostate:GTEx/v8/Cells_Cultured_fibroblasts:GTEx/v8/Skin_Sun_Exposed_Lower_leg:GTEx/v8/Thyroid	-	1.8e-11	rs62160676	4
Chronic Diseases of Tonsils and Adenoids	ENSG00000272829	XXbac-B135H6.18	22	21335650	21336044	-1	lincRNA	NA	NA	NA	NA	0	0	3	2.36052e-06	0.0110638	GTEx/v8/Small_Intestine_Terminal_Ileum	-	3.19e-09	rs78426131	19
Nasal polyps	ENSG00000273217	CTC-432M15.3	5	130761584	131132676	-1	protein_coding	NA	NA	0.996763	NA	5	10.64	0	NA	NA	NA	NA	1.2e-08	rs17132288	5
Chronic Diseases of Tonsils and Adenoids	ENSG00000273428	RP4-539M6.22	22	30831531	30832234	1	lincRNA	NA	NA	NA	NA	0	0	1	0.000142872	0.0426715	GTEx/v8/Adipose_Visceral_Omentum	+	1.24e-19	rs713875	20

## Sheet: TableS10-MAGMA_all_sig_genes
PHENOTYPE	GENE	CHR	START	STOP	NSNPS	NPARAM	N	ZSTAT	P	SYMBOL	NEARBY LOCUS
Nasal Polyps	ENSG00000143387	1	150768684	150780799	14	5	203127	4.943	3.8462e-07	CTSK	YES
Nasal Polyps	ENSG00000143437	1	150782181	150849244	116	17	203127	4.8472	6.2612e-07	ARNT	YES
Nasal Polyps	ENSG00000143412	1	150954493	150968110	39	11	203127	4.6195	1.9234e-06	ANXA9	YES
Vasomotor and Allergic Rhinitis	ENSG00000115594	2	102681004	102796334	443	53	208183	4.8077	7.6329e-07	IL1R1	YES
Nasal Polyps	ENSG00000115602	2	102927962	102968497	211	20	203127	5.3597	4.169e-08	IL1RL1	YES
Upper Respiratory Diseases	ENSG00000115604	2	102927989	103015218	417	31	260405	4.683	1.4139e-06	IL18R1	YES
Chronic sinusitis	ENSG00000115604	2	102927989	103015218	417	31	209643	4.9024	4.733e-07	IL18R1	YES
Nasal Polyps	ENSG00000115604	2	102927989	103015218	417	31	203127	6.706	1.0004e-11	IL18R1	YES
Nasal Polyps	ENSG00000115607	2	103035149	103069025	162	18	203127	6.8665	3.2908e-12	IL18RAP	YES
Upper Respiratory Diseases	ENSG00000109320	4	103422486	103538459	304	26	260405	6.07	6.3938e-10	NFKB1	YES
Chronic Diseases of Tonsils and Adenoids	ENSG00000109320	4	103422486	103538459	304	26	228343	5.6644	7.379e-09	NFKB1	YES
Upper Respiratory Diseases	ENSG00000109323	4	103552660	103682151	375	32	260405	4.9681	3.3804e-07	MANBA	YES
Chronic Diseases of Tonsils and Adenoids	ENSG00000168769	4	106067032	106200973	424	57	228343	5.1457	1.3326e-07	TET2	YES
Upper Respiratory Diseases	ENSG00000138777	4	106290234	106395238	488	36	260405	4.6229	1.8924e-06	PPA2	YES
Chronic Diseases of Tonsils and Adenoids	ENSG00000138777	4	106290234	106395238	488	36	228343	4.6268	1.857e-06	PPA2	YES
Chronic Diseases of Tonsils and Adenoids	ENSG00000174749	4	113066553	113116412	146	21	228343	4.7725	9.0996e-07	C4orf32	YES
Chronic Diseases of Tonsils and Adenoids	ENSG00000145365	4	113195698	113207059	51	4	228343	4.5757	2.3728e-06	TIFA	YES
Upper Respiratory Diseases	ENSG00000145777	5	110405760	110413722	18	7	260405	4.6525	1.6397e-06	TSLP	YES
Vasomotor and Allergic Rhinitis	ENSG00000145777	5	110405760	110413722	18	7	208183	6.0557	6.9894e-10	TSLP	YES
Chronic sinusitis	ENSG00000145777	5	110405760	110413722	18	7	209643	5.8806	2.0434e-09	TSLP	YES
Nasal Polyps	ENSG00000145777	5	110405760	110413722	18	7	203127	7.6048	1.4266e-14	TSLP	YES
Upper Respiratory Diseases	ENSG00000134987	5	110427414	110466200	130	17	260405	4.8426	6.409e-07	WDR36	YES
Vasomotor and Allergic Rhinitis	ENSG00000134987	5	110427414	110466200	130	17	208183	6.2607	1.9164e-10	WDR36	YES
Chronic sinusitis	ENSG00000134987	5	110427414	110466200	130	17	209643	5.8793	2.0602e-09	WDR36	YES
Nasal Polyps	ENSG00000134987	5	110427414	110466200	130	17	203127	7.7006	6.7724e-15	WDR36	YES
Nasal Polyps	ENSG00000152495	5	110559351	110830584	836	56	203127	5.4711	2.2369e-08	CAMK4	YES
Nasal Polyps	ENSG00000164400	5	131409483	131411859	7	4	203127	5.2318	8.3921e-08	CSF2	YES
Diseases of pulp and periapical tissues	ENSG00000164400	5	131409483	131411859	7	4	260405	4.7621	9.58e-07	CSF2	NO
Nasal Polyps	ENSG00000072682	5	131527531	131631008	343	36	203127	4.754	9.9722e-07	P4HA2	YES
Chronic Diseases of Tonsils and Adenoids	ENSG00000198366	6	26020718	26021186	5	3	228343	4.856	5.9888e-07	HIST1H3A	#N/A
Nasal Polyps	ENSG00000197935	6	28962562	28973093	35	9	203127	5.0294	2.4602e-07	ZNF311	#N/A
Chronic Diseases of Tonsils and Adenoids	ENSG00000206503	6	29909037	29913661	52	9	228343	5.3489	4.4242e-08	HLA-A	#N/A
Chronic Diseases of Tonsils and Adenoids	ENSG00000204580	6	30844198	30867933	109	22	228343	5.6602	7.5591e-09	DDR1	#N/A
Chronic Diseases of Tonsils and Adenoids	ENSG00000213780	6	30875961	30881883	29	8	228343	5.1725	1.1548e-07	GTF2H4	#N/A
Chronic Diseases of Tonsils and Adenoids	ENSG00000137411	6	30876019	30894236	102	14	228343	5.0167	2.629e-07	VARS2	#N/A
Chronic Diseases of Tonsils and Adenoids	ENSG00000168631	6	30908749	30921998	42	16	228343	5.6691	7.1783e-09	DPCR1	#N/A
Nasal Polyps	ENSG00000204531	6	31132119	31148508	190	30	203127	5.2631	7.0822e-08	POU5F1	#N/A
Chronic Diseases of Tonsils and Adenoids	ENSG00000234745	6	31321649	31324965	19	9	228343	5.7183	5.3784e-09	HLA-B	#N/A
Chronic Diseases of Tonsils and Adenoids	ENSG00000232810	6	31543344	31546113	7	3	228343	4.5991	2.1211e-06	TNF	#N/A
Nasal Polyps	ENSG00000204356	6	31919864	31926887	21	9	203127	5.0847	1.8409e-07	NELFE	#N/A
Chronic sinusitis	ENSG00000213676	6	32065953	32096030	81	29	209643	4.6533	1.6332e-06	ATF6B	#N/A
Nasal Polyps	ENSG00000204296	6	32256303	32339684	849	37	203127	5.3394	4.6618e-08	C6orf10	#N/A
Chronic sinusitis	ENSG00000204287	6	32407619	32412823	70	12	209643	5.9846	1.0848e-09	HLA-DRA	#N/A
Nasal Polyps	ENSG00000204287	6	32407619	32412823	70	12	203127	7.6053	1.4211e-14	HLA-DRA	#N/A
Upper Respiratory Diseases	ENSG00000196735	6	32595956	32614839	460	27	260405	4.5771	2.3579e-06	HLA-DQA1	#N/A
Chronic sinusitis	ENSG00000196735	6	32595956	32614839	459	27	209643	5.3003	5.7798e-08	HLA-DQA1	#N/A
Nasal Polyps	ENSG00000196735	6	32595956	32614839	459	27	203127	7.2304	2.4086e-13	HLA-DQA1	#N/A
Upper Respiratory Diseases	ENSG00000179344	6	32627244	32636160	213	18	260405	4.796	8.0914e-07	HLA-DQB1	#N/A
Chronic sinusitis	ENSG00000179344	6	32627244	32636160	213	18	209643	5.7033	5.8758e-09	HLA-DQB1	#N/A
Nasal Polyps	ENSG00000179344	6	32627244	32636160	213	18	203127	7.5445	2.2704e-14	HLA-DQB1	#N/A
Nasal Polyps	ENSG00000204252	6	32971955	32977389	49	15	203127	5.5078	1.8166e-08	HLA-DOA	#N/A
Chronic Diseases of Tonsils and Adenoids	ENSG00000091831	6	151977826	152450754	1745	141	228343	4.6905	1.3626e-06	ESR1	NO
Peritonsillar abscess	ENSG00000174945	7	2719156	2815134	514	49	204071	5.3372	4.7201e-08	AMZ1	NO
Upper Respiratory Diseases	ENSG00000164535	7	6448757	6523821	358	50	260405	4.6594	1.5858e-06	DAGLB	NO
Peritonsillar abscess	ENSG00000205884	8	11831446	11832108	4	2	204071	4.9872	3.0638e-07	DEFB136	NO
Chronic Diseases of Tonsils and Adenoids	ENSG00000104365	8	42128820	42189973	132	19	228343	4.6461	1.6912e-06	IKBKB	YES
Chronic Diseases of Tonsils and Adenoids	ENSG00000078668	8	42249142	42263415	27	6	228343	6.0488	7.2965e-10	VDAC3	YES
Chronic sinusitis	ENSG00000137033	9	6215805	6257983	146	21	209643	5.4123	3.1112e-08	IL33	YES
Nasal Polyps	ENSG00000137033	9	6215805	6257983	146	21	203127	6.3828	8.6928e-11	IL33	YES
Nasal Polyps	ENSG00000170777	9	6328349	6331900	16	8	203127	5.874	2.1265e-09	TPD52L3	YES
Nasal Polyps	ENSG00000178445	9	6532464	6645650	510	67	203127	5.0398	2.3302e-07	GLDC	YES
Upper Respiratory Diseases	ENSG00000119408	9	127019885	127115586	279	34	260405	5.4871	2.0424e-08	NEK6	YES
Upper Respiratory Diseases	ENSG00000136930	9	127115745	127177723	117	18	260405	5.4232	2.9265e-08	PSMB7	YES
Nasal Polyps	ENSG00000107485	10	8095567	8117161	78	13	203127	5.6567	7.7149e-09	GATA3	YES
Chronic Diseases of Tonsils and Adenoids	ENSG00000166444	11	8714898	8932498	693	45	228343	4.906	4.6469e-07	ST5	NO
Upper Respiratory Diseases	ENSG00000111321	12	6484211	6500733	47	13	260405	5.7947	3.4213e-09	LTBR	YES
Chronic Diseases of Tonsils and Adenoids	ENSG00000111321	12	6484211	6500733	47	13	228343	5.9645	1.227e-09	LTBR	YES
Peritonsillar abscess	ENSG00000111321	12	6484211	6500733	47	13	204071	5.473	2.2124e-08	LTBR	YES
Nasal Polyps	ENSG00000111540	12	56367697	56388490	45	8	203127	4.6684	1.5178e-06	RAB5B	YES
Peritonsillar abscess	ENSG00000150361	13	70274726	70682591	1998	96	204071	5.823	2.8903e-09	KLHL1	YES
Nasal Polyps	ENSG00000038532	16	11038345	11276046	788	47	203127	4.9455	3.797e-07	CLEC16A	YES
Upper Respiratory Diseases	ENSG00000005844	16	30483979	30534506	84	19	260405	4.8321	6.7562e-07	ITGAL	YES
Chronic Diseases of Tonsils and Adenoids	ENSG00000005844	16	30483979	30534506	84	19	228343	5.2685	6.8761e-08	ITGAL	YES
Chronic Diseases of Tonsils and Adenoids	ENSG00000196118	16	30768744	30774031	7	5	228343	4.6072	2.0407e-06	C16orf93	YES
Chronic sinusitis	ENSG00000073605	17	38060848	38076107	64	7	209643	4.5717	2.4189e-06	GSDMB	NO
Nasal Polyps	ENSG00000172057	17	38077294	38083854	13	6	203127	4.6711	1.4982e-06	ORMDL3	NO
Vasomotor and Allergic Rhinitis	ENSG00000126368	17	38249040	38256978	17	7	208183	4.8661	5.6919e-07	NR1D1	NO
Upper Respiratory Diseases	ENSG00000178951	19	4044362	4066943	38	8	260405	4.787	8.4641e-07	ZBTB7A	YES
Chronic Diseases of Tonsils and Adenoids	ENSG00000178951	19	4044362	4066943	38	8	228343	4.7072	1.256e-06	ZBTB7A	YES
Nasal Polyps	ENSG00000167600	19	41698954	41713444	38	11	203127	5.5384	1.5263e-08	CYP2S1	YES
Chronic sinusitis	ENSG00000176920	19	49199228	49209207	41	5	209643	4.8868	5.1246e-07	FUT2	YES
Vasomotor and Allergic Rhinitis	ENSG00000101246	20	62329996	62339377	18	4	208183	4.7098	1.2399e-06	ARFRP1	NO
Vasomotor and Allergic Rhinitis	ENSG00000197114	20	62338817	62367494	80	8	208183	4.7303	1.1207e-06	ZGPAT	NO
Vasomotor and Allergic Rhinitis	ENSG00000273154	20	62340216	62370456	87	8	208183	4.7088	1.2461e-06	RP4-583P15.15	NO
Vasomotor and Allergic Rhinitis	ENSG00000125520	20	62371214	62374858	11	3	208183	4.661	1.5736e-06	SLC2A4RG	NO
Chronic Diseases of Tonsils and Adenoids	ENSG00000234409	22	20135950	20138399	17	5	228343	4.98	3.18e-07	AC006547.14	YES
Chronic Diseases of Tonsils and Adenoids	ENSG00000186575	22	29999545	30094587	211	27	228343	4.9401	3.904e-07	NF2	YES
Chronic Diseases of Tonsils and Adenoids	ENSG00000100314	22	30116073	30127828	39	10	228343	5.6323	8.8894e-09	CABP7	YES
Chronic Diseases of Tonsils and Adenoids	ENSG00000100319	22	30126945	30163000	126	14	228343	4.811	7.5088e-07	ZMAT5	YES
Chronic Diseases of Tonsils and Adenoids	ENSG00000184076	22	30163358	30166402	8	4	228343	4.8824	5.2399e-07	UQCR10	YES
Chronic Diseases of Tonsils and Adenoids	ENSG00000100325	22	30184597	30234271	154	21	228343	5.0502	2.2069e-07	ASCC2	YES
Upper Respiratory Diseases	ENSG00000100330	22	30279144	30426855	417	43	260405	4.9893	3.0296e-07	MTMR3	YES
Chronic Diseases of Tonsils and Adenoids	ENSG00000100330	22	30279144	30426855	417	43	228343	6.1094	5e-10	MTMR3	YES
Diseases of pulp and periapical tissues	ENSG00000100330	22	30279144	30426855	417	43	260405	4.6415	1.7292e-06	MTMR3	YES
Chronic Diseases of Tonsils and Adenoids	ENSG00000176635	22	30476163	30573064	216	27	228343	6.1094	5e-10	HORMAD2	YES
Chronic sinusitis	ENSG00000100385	22	37521878	37571094	140	33	209643	4.7692	9.246e-07	IL2RB	NO
Nasal Polyps	ENSG00000100385	22	37521878	37571094	140	33	203127	4.6103	2.01e-06	IL2RB	NO
Chronic Diseases of Tonsils and Adenoids	ENSG00000188263	22	50432942	50451088	68	12	228343	4.9815	3.1553e-07	IL17REL	YES

[truncated: 1 more sheets: TableS11-FinnGen_permits]
