# Supplementary material for: Inflammatory and infectious upper respiratory diseases associate with 59 genomic loci that link to type 2 inflammation genes
Source: Research Square preprint supplement (doi:10.21203/rs.3.rs-654053/v1), 2021-07-12
Supplement: Supplementary file 5 [file 4bd91de4d6dd6e4d72e64b11.xlsx]

## Sheet: Sheet1
					J30-J39: Inflammatory and infectious upper respiratory diseases (n = 61,197)
								Sinonasal dis.		J31: CRNP		Pharyngeal dis.		J37: CL
BAND	Alleles	Nearest gene	rsid	EAF	OR (95 % CI)		p	OR (95 % CI)		OR (95 % CI)		OR (95 % CI)		OR (95 % CI)
2q12.1	G/T	IL18R1,IL1RL1	rs950881	0.162	0.95	(0.92–0.97)	2.69e-08	0.9	(0.87–0.93)	0.96	(0.91–1.02)	0.97	(0.94–1.00)	1.02	(0.94–1.10)
2q13	A/G	MIR4435-2HG	rs1045267	0.66	0.95	(0.93–0.97)	6.26e-11	0.99	(0.96–1.01)	0.99	(0.95–1.04)	0.91	(0.88–0.93)	0.96	(0.90–1.03)
2q33.3	A/G	ADAM23	rs189411872	0.013	1.2	(1.12–1.28)	1.87e-08	1.13	(1.03–1.24)	1.02	(0.86–1.21)	1.4	(1.28–1.53)	1	(0.77–1.30)
3q13.12	G/T	CCDC54	rs187688516	0.017	0.85	(0.80–0.91)	3.72e-08	0.89	(0.82–0.97)	0.89	(0.77–1.03)	0.83	(0.76–0.90)	0.82	(0.66–1.01)
3q21.2	C/T	SLC12A8	rs1980080	0.653	0.96	(0.94–0.98)	1.52e-08	0.98	(0.95–1.00)	0.96	(0.92–1.00)	0.93	(0.91–0.96)	1.01	(0.95–1.08)
4q24	A/G	NFKB1	rs4648051	0.32	0.95	(0.93–0.97)	4.88e-10	0.96	(0.93–0.98)	0.98	(0.94–1.03)	0.94	(0.91–0.96)	1	(0.93–1.06)
4q24	G/GC	TET2	rs5860793	0.716	1.05	(1.03–1.07)	1.24e-09	1.03	(1.01–1.06)	1.06	(1.02–1.11)	1.08	(1.05–1.11)	1.06	(0.99–1.13)
5p13.2	T/TT	IL7R	rs11406102	0.33	0.96	(0.94–0.98)	2.12e-08	0.95	(0.92–0.97)	0.97	(0.93–1.01)	0.95	(0.93–0.98)	0.95	(0.89–1.01)
5q22.1	T/C	TSLP	rs1837253	0.754	1.05	(1.03–1.07)	6.66e-09	1.1	(1.07–1.13)	1.04	(0.99–1.09)	1.03	(1.01–1.06)	1.03	(0.96–1.10)
6p22-21	-/-	HLA	-	-	1.07	(1.04–1.09)	3.87e-12	1.11	(1.08–1.14)	0.57	(0.41–0.78)	1.16	(1.10–1.21)	1.13	(1.06–1.21)
9p24.1	T/C	IL33	rs2095044	0.76	0.95	(0.93–0.97)	3.34e-10	0.88	(0.85–0.91)	0.96	(0.91–1.00)	0.99	(0.97–1.02)	0.97	(0.90–1.04)
9q33.3	C/T	NEK6	rs3758213	0.381	0.95	(0.93–0.97)	1.75e-10	0.94	(0.92–0.97)	0.94	(0.90–0.98)	0.95	(0.93–0.98)	0.99	(0.93–1.05)
12p13.31	A/G	LTBR	rs10849448	0.755	0.94	(0.92–0.96)	7.68e-15	0.97	(0.94–1.00)	1	(0.96–1.05)	0.9	(0.88–0.92)	1.03	(0.96–1.10)
12p13.31	A/G	PZP	rs967884772	0.011	1.23	(1.14–1.32)	1.15e-08	1.24	(1.12–1.37)	1	(0.83–1.20)	1.22	(1.11–1.35)	1.27	(0.95–1.70)
13q21.33	T/C	KLHL1	rs9542155	0.643	0.96	(0.94–0.98)	4.6e-08	0.98	(0.95–1.01)	1	(0.96–1.04)	0.94	(0.92–0.96)	0.96	(0.90–1.02)
14q21.1	A/G	FBXO33	rs112672184	0.002	1.57	(1.34–1.83)	8.73e-09	1.66	(1.32–2.07)	1.22	(0.81–1.83)	1.72	(1.40–2.12)	1.16	(0.62–2.17)
15q22.33	C/T	SMAD3	rs17293632	0.262	1.05	(1.02–1.07)	2.63e-08	1.07	(1.04–1.10)	1.04	(0.99–1.08)	1.04	(1.01–1.06)	1.07	(1.00–1.14)
17p11.2	C/G	TNFRSB13B	rs573841223	0.025	1.21	(1.15–1.27)	1.41e-15	1.04	(0.97–1.12)	1.12	(0.99–1.26)	1.42	(1.33–1.52)	0.98	(0.81–1.19)
17q21.2	A/G	KRT19	rs551772399	0.021	1.15	(1.09–1.22)	2.08e-08	1.16	(1.08–1.25)	1.11	(0.98–1.27)	1.17	(1.10–1.26)	0.91	(0.73–1.12)
19p13.3	G/A	ZBTB7A	rs74178437	0.738	1.05	(1.03–1.07)	2.29e-08	1.03	(1.01–1.06)	1.04	(1.00–1.09)	1.07	(1.04–1.10)	1.06	(0.99–1.13)
Table 2: Lead SNPs of Genome-wide associated loci in GWAS of IURD (n = 61,197). Phenotypes (sinonasal diseases, CRNP, pharyngeal diseases and CL) have effect sizes annotated with 95 % CI. ‘Alleles’ denotes the reference / effect alleles. EAF: Effect allele frequency. The HLA locus is annotated for the lead SNP according to each phenotype, not the corresponding SNP of the parent GWAS (IURD).
